# Supplementary material for: Electronic spectroscopy of homo- and heterometallic binuclear coinage metal phosphine complexes in isolation
Source: Royal Society of Chemistry journal article supplement (doi:10.1039/d3cp03058j), 2023-01-01
Supplement: d3cp03058j1.pdf [file d3cp03058j1.pdf]

## Supporting Information

# Electronic spectroscopy of homo- and heterometallic binuclear coinage metal phosphine complexes in isolation

Marcel J. P. Schmitt<sup>[a]</sup>, Sebastian V. Kruppa<sup>[a]</sup>, Simon P. Walg<sup>[a]</sup>, Werner R. Thiel<sup>[a]</sup>, Wim Klopper<sup>[b]\*</sup>, Christoph Riehn<sup>[a,c]\*</sup>

- 
- [a] M. J. P. Schmitt, Dr. S. V. Kruppa, Dr. S. P. Walg, Prof. Dr. W. R. Thiel, Dr. C. Riehn  
Department of Chemistry  
Rheinland-Pfälzische Technische Universität (RPTU)  
Erwin-Schrödinger Str. 52, 67663 Kaiserslautern (Germany)  
E-mail: [riehn@chemie.uni-kl.de](mailto:riehn@chemie.uni-kl.de)
- [b] Prof. Dr. W. Klopper  
Institute of Physical Chemistry  
Karlsruhe Institute of Technology (KIT)  
Fritz-Haber-Weg 2, 76131 Karlsruhe (Germany)  
E-Mail: [klopper@kit.edu](mailto:klopper@kit.edu)
- [c] Dr. C. Riehn  
Research Center OPTIMAS  
Erwin-Schrödinger Str. 46, 67663 Kaiserslautern (Germany)

\* Corresponding authors.

# Table of contents

1. Mass spectrometric results
  - 1.1. ESI-MS overview spectrum (Fig. S1)
  - 1.2. Collision induced dissociation (CID) and photodissociation (PD)
    - 1.2.1. Isolated, CID and PD mass spectra (Figs. S2-6)
    - 1.2.2. Fragment assignment (Tabs. S1-5)
    - 1.2.3. Mass spectrometric isotope patterns of CID fragment channels (Tabs. S6-10)
    - 1.2.4. CID breakdown and appearance curves of heterobimetallic species (Fig. S7)
    - 1.2.5. Mass spectrometric isotope patterns of femtosecond PD fragment channels (Tabs. S11-15)
    - 1.2.6. Mass spectrometric isotope patterns of nanosecond PD fragment channels (Tabs. S16-21)
2. Fragment channel specific UV PD spectra
  - 2.1. Femtosecond Laser System (Figs. S8-12)
  - 2.2. Nanosecond Laser System (Figs. S13-18)
3. Dependence of total fragment yield on laser pulse energy (Figs. S19-24)
4. Comparison of femto- and nanosecond UV PD spectra (Figs. S25-30)
5. Trends of electronic transitions (Figs. S31-32)
6. Calculated natural population analysis and natural transition orbitals (NTOs) (Tabs. S22-23, Fig. S33)
7. Calculated *GW* quasiparticle energies (Fig. S34)
8. Hybridization and distance variation (Figs. S35-36)
9. Calculated transition energy properties and charge distribution (Tab. S24, Fig. S25)
10. Cooperativity (Tab. S26)
11. Calculated Coordinates (Tab. S27-32)

# 1. Mass spectrometric results

## 1.1 ESI-MS overview spectrum

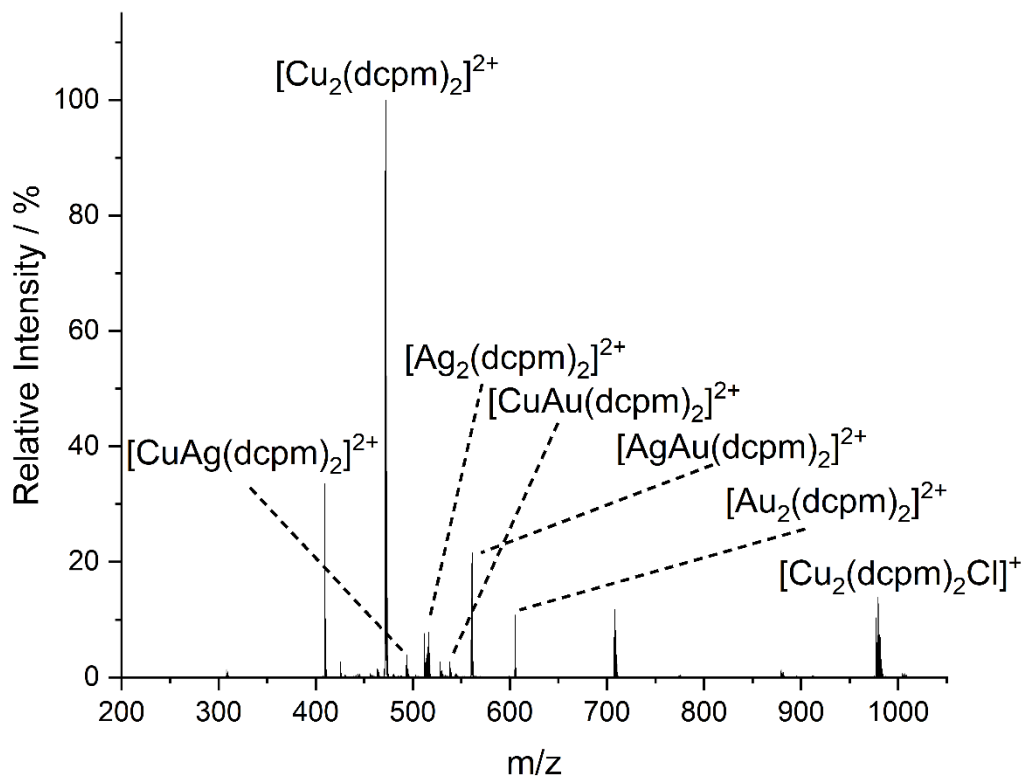

**Fig. S1** Overview ESI-MS of  $[\text{Cu}_2(\text{dcpm})_2][\text{PF}_6]_2$ ,  $[\text{Ag}_2(\text{dcpm})_2][\text{PF}_6]_2$ , and  $[\text{Au}_2(\text{dcpm})_2][\text{PF}_6]_2$  mixture (MeCN,  $c = 10^{-6}$  M, respectively).

## 1.2 Collision induced dissociation (CID) and photodissociation (PD)

### 1.2.1 Isolated, CID and PD mass spectra

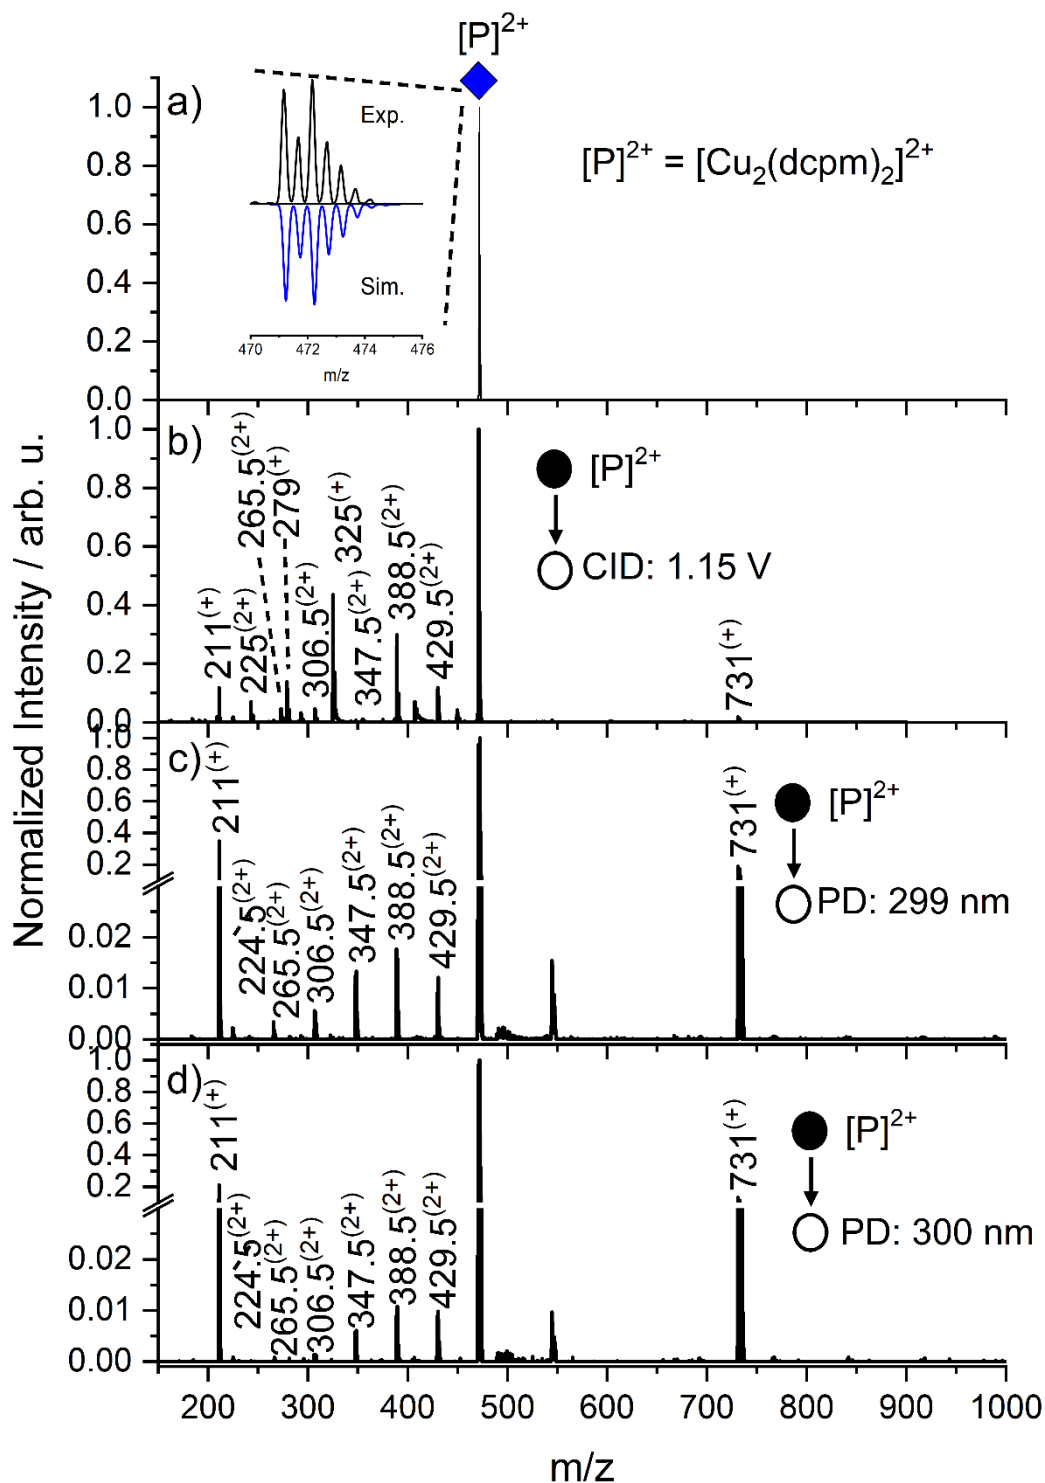

**Fig. S2** a) Isolation, b) CID (excitation amplitude = 1.15 V), and UV PD mass spectra of  $[\text{Cu}_2(\text{dcpm})_2]^{2+}$  precursor ions ( $m/z$  471) with corresponding fragmentation products recorded by c) femto- (299 nm, 2  $\mu\text{J}$ , ca. 118 pulses), or d) nanosecond laser system (300 nm, 2  $\mu\text{J}$ , ca. 118 pulses), respectively. Integer nominal masses are indicated. Isolated experimental (black) and simulated (blue) isotope patterns are displayed in inset.

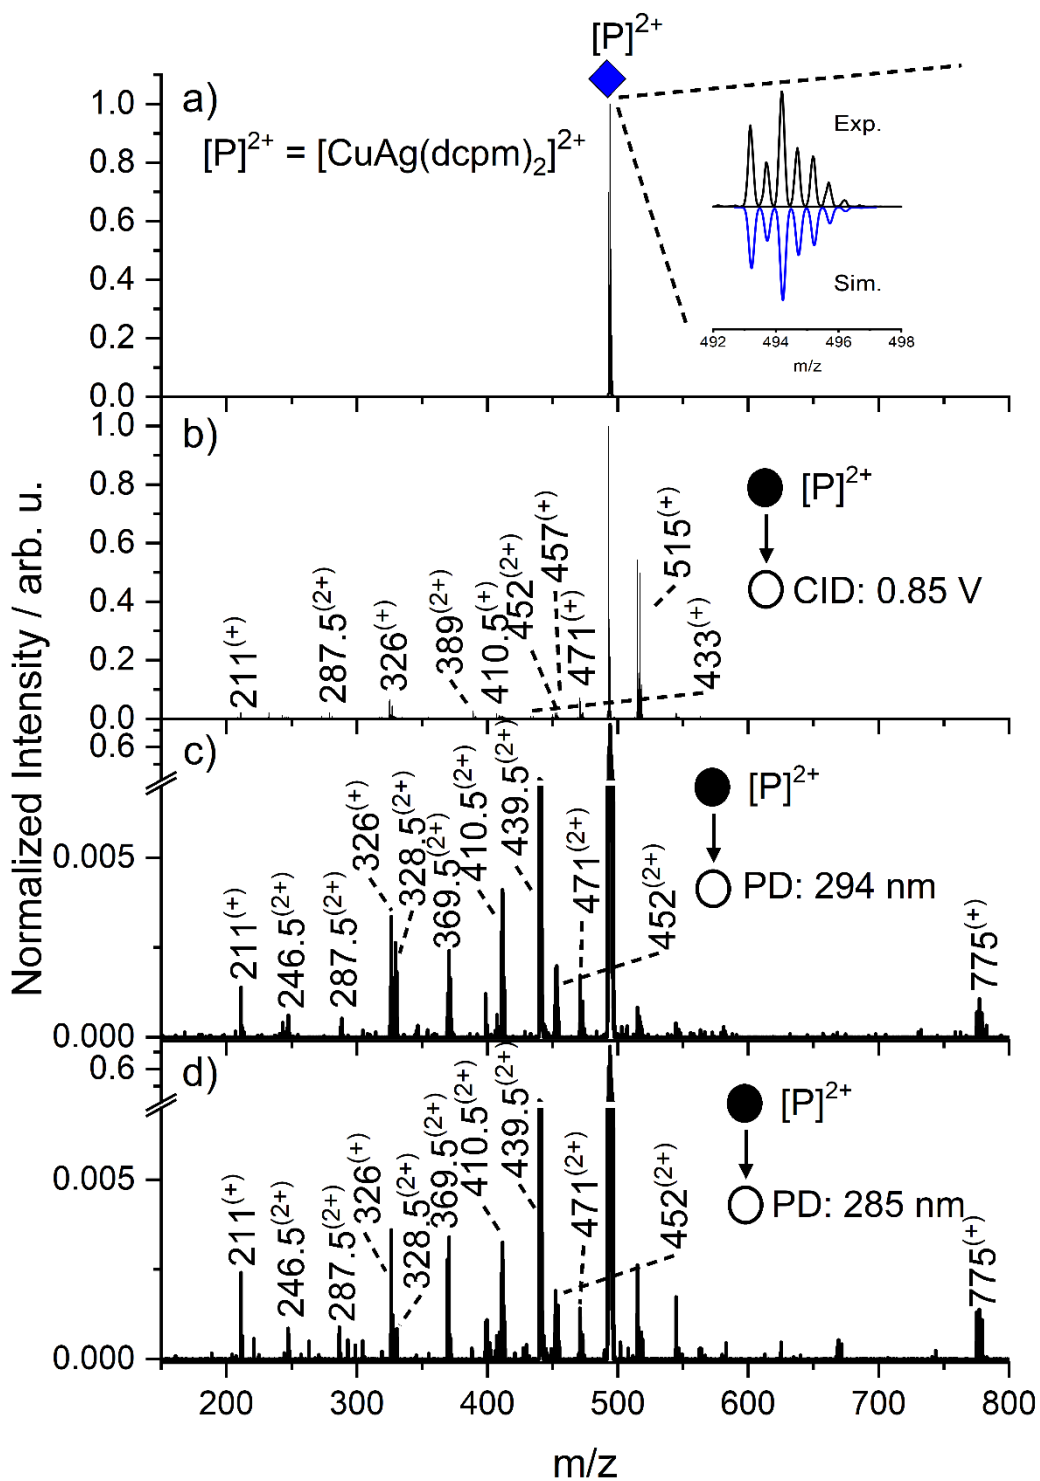

**Fig. S3** a) Isolation, b) CID (excitation amplitude = 0.85 V), and UV PD mass spectra of  $[CuAg(dcpm)_2]^{2+}$  precursor ions ( $m/z$  494) with corresponding fragmentation products recorded by c) femto- (294 nm, 2  $\mu$ J, ca. 118 pulses), or d) nanosecond laser system (285 nm, 2  $\mu$ J, ca. 118 pulses), respectively. Integer nominal masses are indicated. Isolated experimental (black) and simulated (blue) isotope patterns are displayed in inset.

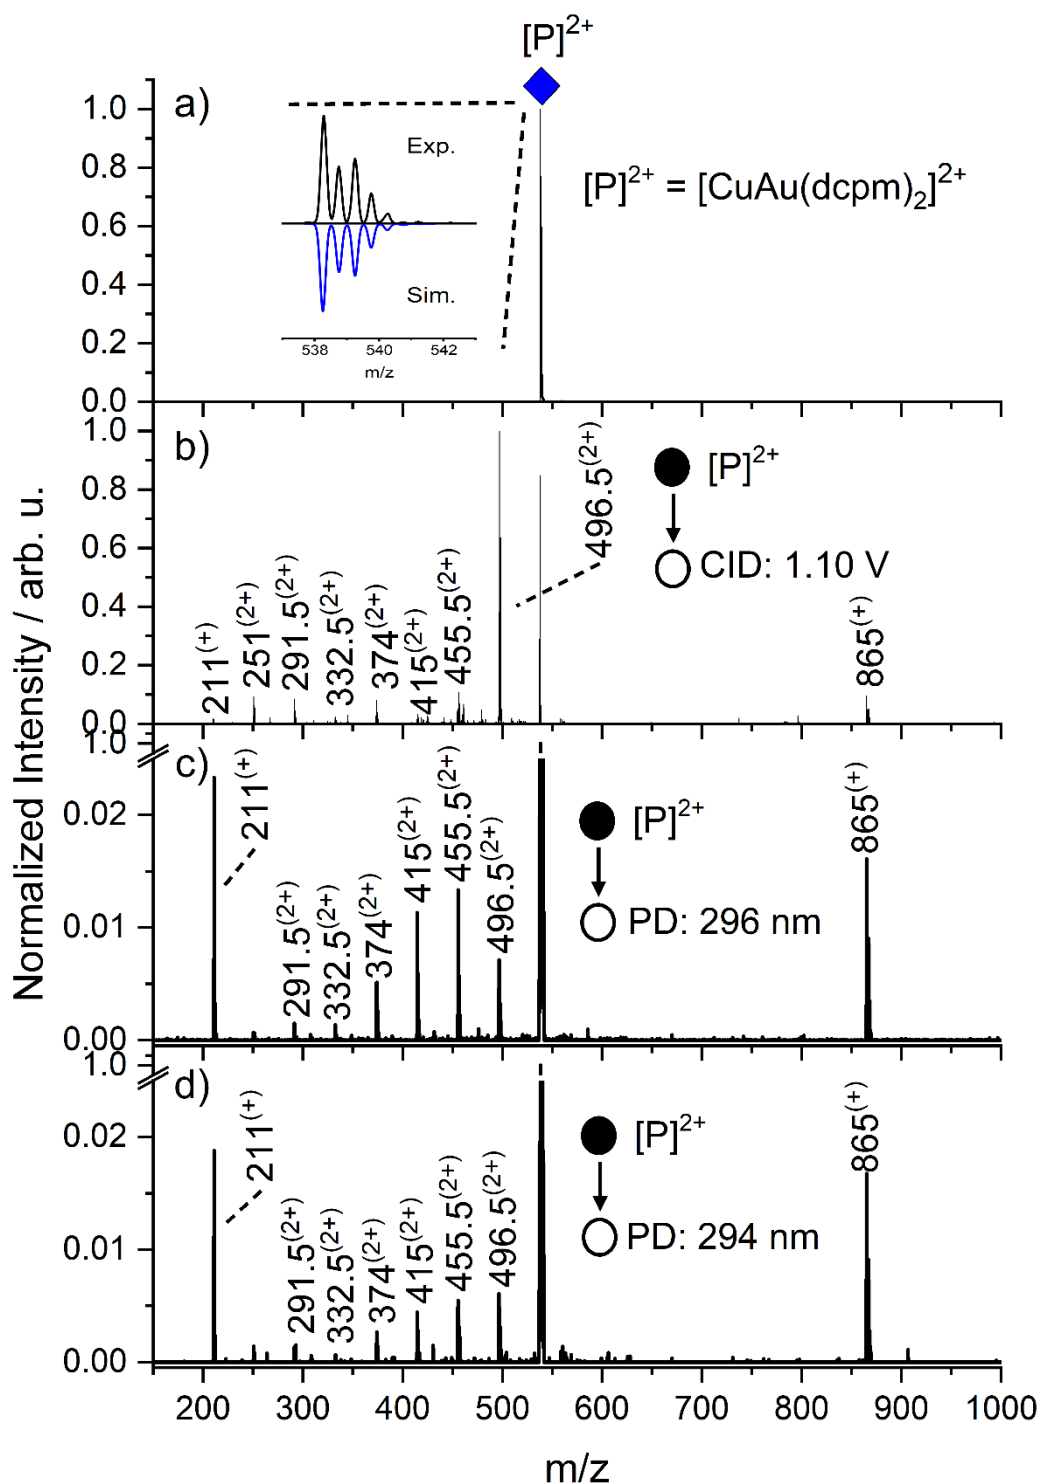

**Fig. S4** a) Isolation, b) CID (excitation amplitude = 1.1 V), and UV PD mass spectra of  $[CuAu(dcpm)_2]^{2+}$  precursor ions ( $m/z$  538) with corresponding fragmentation products recorded by c) femto- (296 nm, 2  $\mu$ J, ca. 118 pulses), or d) nanosecond laser system (294 nm, 2  $\mu$ J, ca. 118 pulses), respectively. Integer nominal masses are indicated. Isolated experimental (black) and simulated (blue) isotope patterns are displayed in inset.

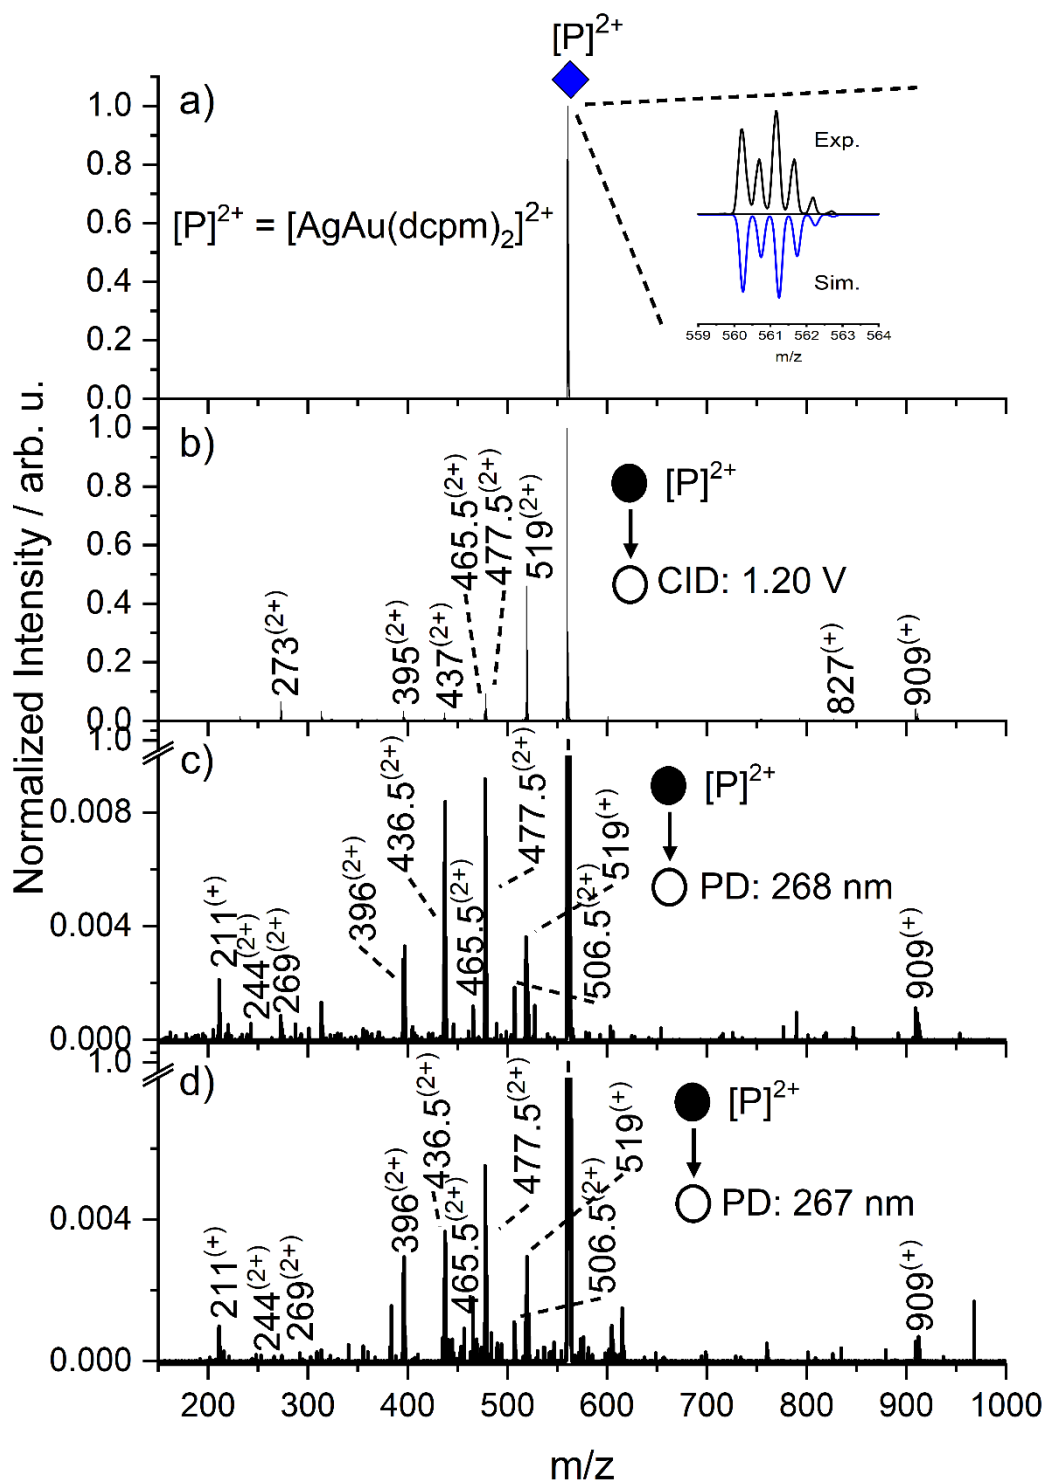

**Fig. S5** a) Isolation, b) CID (excitation amplitude = 1.2 V), and UV PD mass spectra of  $[AgAu(dcpm)_2]^{2+}$  precursor ions ( $m/z$  560) with corresponding fragmentation products recorded by c) femto- (268 nm, 2  $\mu$ J, ca. 118 pulses), or d) nanosecond laser system (267 nm, 2  $\mu$ J, ca. 118 pulses), respectively. Integer nominal masses are indicated. Isolated experimental (black) and simulated (blue) isotope patterns are displayed in inset.

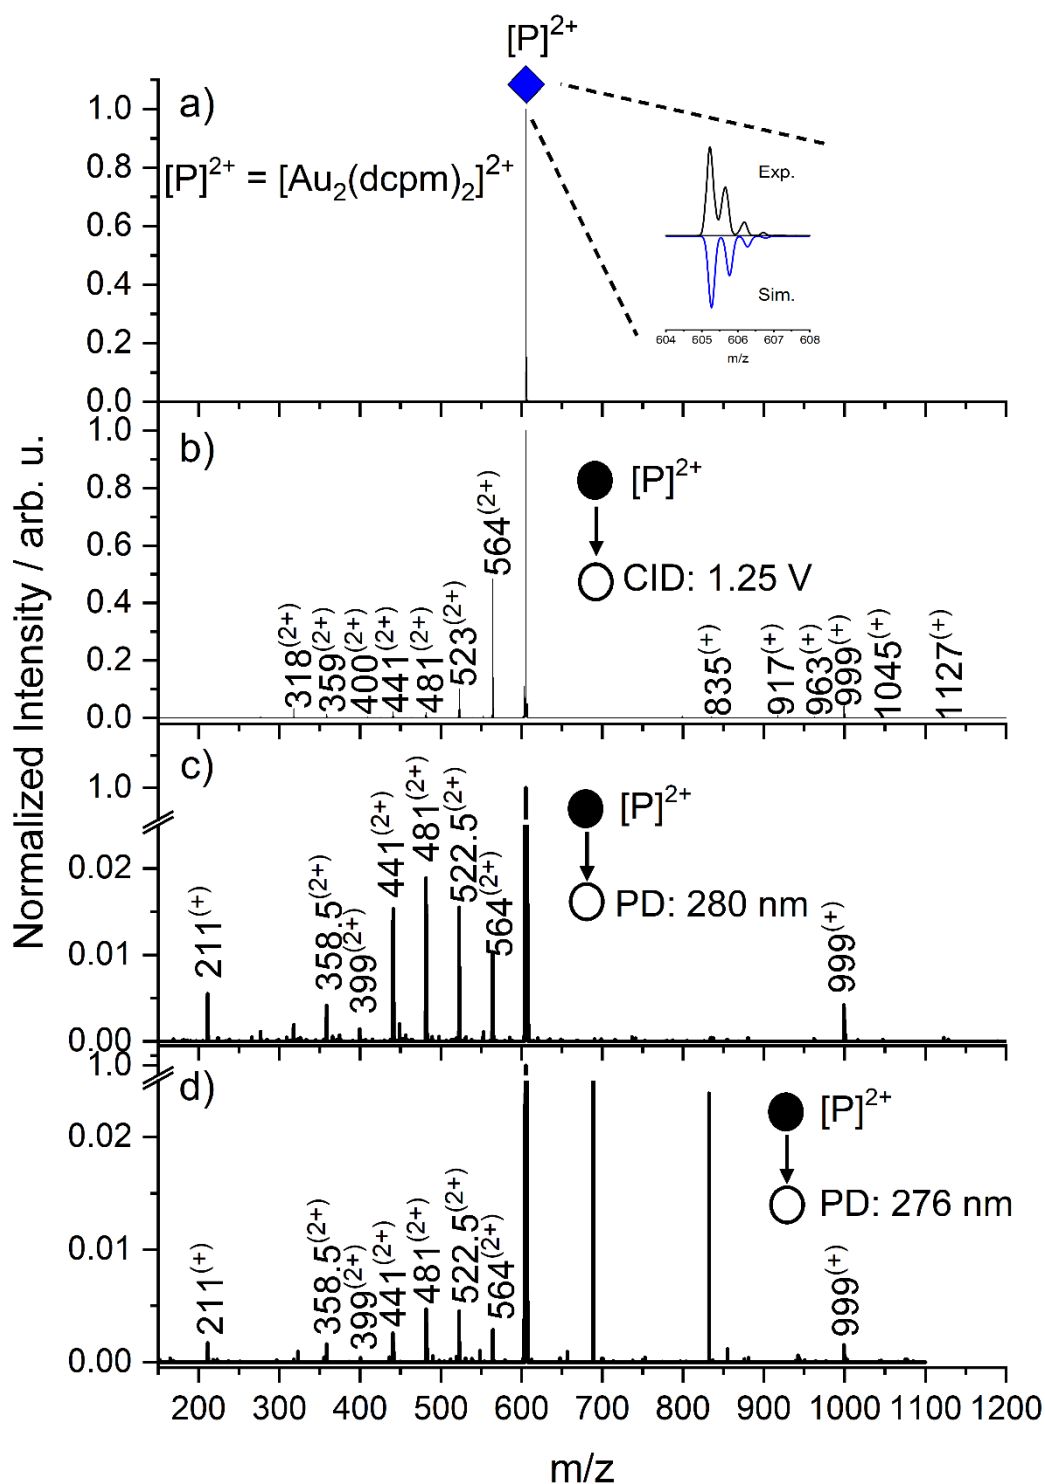

**Fig. S6** a) Isolation, b) CID (excitation amplitude = 1.25 V), and UV PD mass spectra of  $[Au_2(dcpm)_2]^{2+}$  precursor ions ( $m/z$  605) with corresponding fragmentation products recorded by c) femto- (280 nm, 2  $\mu$ J, ca. 118 pulses), or d) nanosecond laser system (276 nm, 2  $\mu$ J, ca. 118 pulses), respectively. Integer nominal masses are indicated. Isolated experimental (black) and simulated (blue) isotope patterns are displayed in inset.



## 1.2.2 Fragment assignment

**Tab. S1** Mass spectrometric PD and CID fragment assignments of  $[\text{Cu}_2(\text{dcpm})_2]^{2+}$  dication. Nominal masses of isolated precursor P and fragment ions  $F_i$  are indicated. Charge states, fragment formula and losses are shown. Fragments are categorized into ionic and neutral losses. Percentages of total fragment yields were displayed for CID (excitation amplitude = 1.1 V) and UV PD ( $\lambda_{\text{ex}} = 297.5 \text{ nm}$ ,  $2 \mu\text{J}$ ), respectively.

| Label           | Isolation                                                                         | $m/z$   | $z$ | Loss                                                           | Category | CID / PD [%] |
|-----------------|-----------------------------------------------------------------------------------|---------|-----|----------------------------------------------------------------|----------|--------------|
| P               | $[\text{Cu}_2(\text{dcpm})_2]^{2+}$                                               | 471     | 2   |                                                                |          |              |
| F <sub>1</sub>  | $[\text{Cu}_2(\text{dcpm})(\text{PCy}_2)]^+$                                      | 731     | 1   | $(\text{PCH}_2\text{Cy}_2)^+$                                  | IF       | ✓/✓ [2/50]   |
| F <sub>2</sub>  | $[\text{Cu}_2(\text{dcpm})(\text{P}_2\text{CH}_2\text{Cy}_3\text{H})]^{2+}$       | 430     | 2   | (Cy-H)                                                         | NL       | ✓/✓ [11/3]   |
|                 | $[\text{Cu}_2(\text{dcpm})(\text{P}_2\text{CH}_2\text{Cy}_3)]^{2+}$               | (429.5) | 2   | (Cy)                                                           | NL       |              |
| F <sub>3</sub>  | $[\text{Cu}_2(\text{dcpm})(\text{P}_2\text{CH}_2\text{Cy}_2\text{H})]^{2+}$       | 388.5   | 2   | (Cy), (Cy-H)                                                   | NL       | ✓/✓ [20/4]   |
| F <sub>4</sub>  | $[\text{Cu}_2(\text{dcpm})(\text{P}_2\text{CH}_2\text{Cy})\text{H}_2]^{2+}$       | 347.5   | 2   | (Cy), 2(Cy-H)                                                  | NL       | ✓/✓ [1/3]    |
|                 | $[\text{Cu}_2(\text{dcpm})(\text{P}_2\text{CH}_2\text{Cy})\text{H}]^{2+}$         | (347)   | 2   | 2(Cy), (Cy-H)                                                  | NL       |              |
| F <sub>5</sub>  | $[\text{Cu}(\text{CH}_2)_2\text{P}_2\text{Cy}_2\text{H}_2(\text{H}_2\text{O})]^+$ | 325     | 1   | $[\text{Cu}(\text{dcpm})]^+$ , 2(Cy-H), $+\text{H}_2\text{O}$  | IF       | ✓/- [37/-]   |
| F <sub>6</sub>  | $[\text{Cu}_2(\text{CH}_2)_2\text{P}_2(\text{Cy})_4\text{H}_3]^{2+}$              | 306.5   | 2   | (Cy), 3(Cy-H)                                                  | NL       | ✓/✓ [3/1]    |
| F <sub>7</sub>  | $[\text{Cu}(\text{CH}_2)\text{P}_2\text{CyH}_3(\text{H}_2\text{O})_3]^+$          | 279     | 1   | $[\text{Cu}(\text{dcpm})]^+$ , 3(Cy-H), $+3\text{H}_2\text{O}$ | IF       | ✓/- [9/-]    |
| F <sub>8</sub>  | $[\text{Cu}_2(\text{CH}_2)_2\text{P}_4(\text{Cy})_3\text{H}_4]^{2+}$              | 265.5   | 2   | (Cy), 4(Cy-H)                                                  | NL       | ✓/✓ [1/0]    |
| F <sub>9</sub>  | $[\text{Cu}(\text{CH}_2)\text{P}_4\text{CyH}_3(\text{H}_2\text{O})]^+$            | 243     | 1   | $[\text{Cu}(\text{dcpm})]^+$ , 3(Cy-H), $+\text{H}_2\text{O}$  | IF       | ✓/- [4/-]    |
| F <sub>10</sub> | $[\text{Cu}_2(\text{CH}_2)_2\text{P}_4(\text{Cy})_2\text{H}_6]^{2+}$              | 225     | 2   | 6(Cy-H)                                                        | NL       | ✓/✓ [2/0]    |
|                 | $[\text{Cu}_2(\text{CH}_2)_2\text{P}_4(\text{Cy})_2\text{H}_5]^{2+}$              | (224.5) | 2   | (Cy), 5(Cy-H)                                                  | NL       |              |
|                 | $[\text{Cu}_2(\text{CH}_2)_2\text{P}_4(\text{Cy})_2\text{H}_4]^{2+}$              | (224)   | 2   | 2(Cy), 4(Cy-H)                                                 | NL       |              |
| F <sub>12</sub> | $(\text{PCH}_2\text{Cy}_2)^+$                                                     | 211     | 1   | $[\text{Cu}_2(\text{dcpm})(\text{PCy}_2)]^+$                   | IF       | ✓/✓ [6/32]   |

**Tab. S2** Mass spectrometric PD and CID fragment assignments of  $[\text{CuAg}(\text{dcpm})_2]^{2+}$  dication. Nominal masses of isolated precursor P and fragment ions  $F_i$  are indicated. Charge states, fragment formula and losses are shown. Fragments are categorized into ionic and neutral losses. Percentages of total fragment yields were displayed for CID (excitation amplitude = 0.85 V) and UV PD ( $\lambda_{\text{ex}} = 290 \text{ nm}$ ,  $2 \mu\text{J}$ ), respectively.

| Label           | Isolation                                                            | m/z     | z | Loss                                                            | Category | CID / PD [%] |
|-----------------|----------------------------------------------------------------------|---------|---|-----------------------------------------------------------------|----------|--------------|
| P               | $[\text{CuAg}(\text{dcpm})_2]^{2+}$                                  | 493     | 2 |                                                                 |          |              |
| F <sub>1</sub>  | $[\text{CuAg}(\text{CH}_2)\text{P}_3(\text{Cy})_6]^+$                | 775     | 1 | $(\text{PCH}_2\text{Cy}_2)^+$                                   | IF       | -/✓ [0/2]    |
| F <sub>2</sub>  | $[\text{Ag}(\text{CH}_2)\text{P}_2(\text{Cy})_4]^+$                  | 515     | 1 | $[\text{Cu}(\text{CH}_2)\text{P}_2(\text{Cy})_4]^+$             | IF       | ✓/- [64/-]   |
| F <sub>3</sub>  | $[\text{Cu}(\text{CH}_2)\text{P}_2(\text{Cy})_4]^+$                  | 471     | 1 | $[\text{Ag}(\text{CH}_2)\text{P}_2(\text{Cy})_4]^+$             | IF       | ✓/✓ [6/3]    |
| F <sub>4</sub>  | $[\text{CuP}_2(\text{Cy})_4]^+$                                      | 457     | 1 | $[\text{Ag}(\text{dcpm})(\text{CH}_2)]^+$                       | IF       | ✓/- [4/-]    |
| F <sub>5</sub>  | $[\text{CuAg}(\text{CH}_2)_2\text{P}_4(\text{Cy})_7\text{H}]^{2+}$   | 452     | 2 | (Cy-H)                                                          | NL       | ✓/✓ [1/6]    |
|                 | $[\text{CuAg}(\text{CH}_2)_2\text{P}_4(\text{Cy})_7\text{H}]^{2+}$   | (451.5) | 2 | (Cy)                                                            | NL       |              |
| F <sub>6</sub>  | $[\text{Cu}(\text{CH}_2)_2\text{P}_4(\text{Cy})_8]^{2+}$             | 439.5   | 2 | $\text{Ag}^0$                                                   | NL       | -/✓ [0/67]   |
| F <sub>7</sub>  | $[\text{Ag}(\text{CH}_2)\text{P}_2(\text{Cy})_3\text{H}]^+$          | 433     | 1 | $[\text{Cu}(\text{CH}_2)\text{P}_2(\text{Cy})_4]^+$ ,<br>(Cy-H) | IF       | ✓/- [1/-]    |
| F <sub>8</sub>  | $[\text{CuAg}(\text{CH}_2)_2\text{P}_4(\text{Cy})_6\text{H}]^{2+}$   | 410.5   | 2 | (Cy), (Cy-H)                                                    | NL       | ✓/✓ [6/9]    |
| F <sub>9</sub>  | $[\text{CuAg}(\text{CH}_2)_2\text{P}_4(\text{Cy})_5\text{H}_2]^{2+}$ | 369.5   | 2 | (Cy), 2(Cy-H)                                                   | NL       | -/✓ [0/5]    |
| F <sub>10</sub> | $[\text{CuAg}(\text{CH}_2)_2\text{P}_4(\text{Cy})_4\text{H}_3]^{2+}$ | 328.5   | 2 | (Cy), 3(Cy-H)                                                   | NL       | ✓/✓ [10/7]   |
| F <sub>11</sub> | $(\text{CH}_2\text{P}_2(\text{Cy})_3\text{H})^+$                     | (326)   | 1 | $[\text{CuAg}(\text{dcpm})(\text{Cy-H})]^+$                     | IF       |              |
| F <sub>12</sub> | $(\text{PCH}_2\text{Cy}_2)^+$                                        | 211     | 1 | $[\text{CuAg}(\text{dcpm})(\text{PCy}_2)]^+$                    | IF       | ✓/✓ [1/1]    |

**Tab. S3** Mass spectrometric PD and CID fragment assignments of  $[\text{CuAu}(\text{dcpm})_2]^{2+}$  dication. Nominal masses of isolated precursor P and fragment ions  $F_i$  are indicated. Charge states, fragment formula and losses are shown. Fragments are categorized into ionic and neutral losses. Percentages of total fragment yields were displayed for CID (excitation amplitude = 1.1 V) and UV PD ( $\lambda_{\text{ex}} = 296 \text{ nm}$ ,  $2 \mu\text{J}$ ), respectively.

| Label          | Isolation                                                             | m/z     | z | Loss                                         | Category | CID /PD [%] |
|----------------|-----------------------------------------------------------------------|---------|---|----------------------------------------------|----------|-------------|
| P              | $[\text{CuAu}(\text{dcpm})_2]^{2+}$                                   | 538     | 2 |                                              |          |             |
| F <sub>1</sub> | $[\text{CuAu}(\text{CH}_2)\text{P}_3(\text{Cy})_6]^+$                 | 865     | 1 | $(\text{PCH}_2\text{Cy}_2)^+$                | IF       | ✓/✓ [6/27]  |
| F <sub>2</sub> | $[\text{CuAu}(\text{CH}_2)\text{P}_4(\text{Cy})_6(\text{Cy-H})]^{2+}$ | 497     | 2 | (Cy), H                                      | NL       | ✓/✓ [59/10] |
|                | $[\text{CuAu}(\text{CH}_2)_2\text{P}_4(\text{Cy})_7]^{2+}$            | (496.5) | 2 | (Cy)                                         | NL       |             |
| F <sub>3</sub> | $[\text{CuAu}(\text{CH}_2)\text{P}_4(\text{Cy})_6\text{H}_2]^{2+}$    | 456     | 2 | 2(Cy-H)                                      | NL       | ✓/✓ [11/15] |
|                | $[\text{CuAu}(\text{CH}_2)\text{P}_4(\text{Cy})_6\text{H}]^{2+}$      | (455.5) | 2 | (Cy), (Cy-H)                                 | NL       |             |
|                | $[\text{CuAu}(\text{CH}_2)\text{P}_4(\text{Cy})_6]^{2+}$              | (455)   | 2 | 2(Cy)                                        |          |             |
| F <sub>4</sub> | $[\text{CuAu}(\text{CH}_2)\text{P}_4(\text{Cy})_5\text{H}_3]^{2+}$    | 415     | 2 | 3(Cy-H)                                      | NL       | ✓/✓ [3/14]  |
|                | $[\text{CuAu}(\text{CH}_2)\text{P}_4(\text{Cy})_5\text{H}_2]^{2+}$    | (414.5) | 2 | (Cy), 2(Cy-H)                                | NL       |             |
|                | $[\text{CuAu}(\text{CH}_2)\text{P}_4(\text{Cy})_5\text{H}]^{2+}$      | (414)   | 2 | 2(Cy), (Cy-H)                                | NL       |             |
| F <sub>5</sub> | $[\text{CuAu}(\text{CH}_2)\text{P}_4(\text{Cy})_4\text{H}_4]^{2+}$    | 374     | 2 | 4(Cy-H)                                      | NL       | ✓/✓ [5/10]  |
|                | $[\text{CuAu}(\text{CH}_2)\text{P}_4(\text{Cy})_4\text{H}_3]^{2+}$    | (373.5) | 2 | (Cy), 3(Cy-H)                                | NL       |             |
|                | $[\text{CuAu}(\text{CH}_2)\text{P}_4(\text{Cy})_4\text{H}_2]^{2+}$    | (373)   | 2 | 2(Cy), 2(Cy-H)                               | NL       |             |
| F <sub>6</sub> | $[\text{CuAu}(\text{CH}_2)\text{P}_4(\text{Cy})_3\text{H}_4]^{2+}$    | 332.5   | 2 | (Cy), 4(Cy-H)                                | NL       | ✓/✓ [2/1]   |
|                | $[\text{CuAu}(\text{CH}_2)\text{P}_4(\text{Cy})_3\text{H}_3]^{2+}$    | (332)   | 2 | 2(Cy), 3(Cy-H)                               | NL       |             |
| F <sub>7</sub> | $[\text{CuAu}(\text{CH}_2)\text{P}_4(\text{Cy})_2\text{H}_5]^{2+}$    | 291.5   | 2 | (Cy), 5(Cy-H)                                | NL       | ✓/✓ [5/2]   |
|                | $[\text{CuAu}(\text{CH}_2)\text{P}_4(\text{Cy})_2\text{H}_4]^{2+}$    | (291)   | 2 | 2(Cy), 4(Cy-H)                               | NL       |             |
| F <sub>8</sub> | $[\text{CuAu}(\text{CH}_2)\text{P}_4(\text{Cy})\text{H}_7]^{2+}$      | 251     | 2 | 7(Cy-H)                                      | NL       | ✓/✓ [4/1]   |
|                | $[\text{CuAu}(\text{CH}_2)\text{P}_4(\text{Cy})\text{H}_6]^{2+}$      | (250.5) | 2 | (Cy), 6(Cy-H)                                | NL       |             |
| F <sub>9</sub> | $(\text{PCH}_2\text{Cy}_2)^+$                                         | 211     | 1 | $[\text{CuAu}(\text{dcpm})(\text{PCy}_2)]^+$ | IF       | ✓/✓ [1/19]  |

**Tab. S4** Mass spectrometric PD and CID fragment assignments of  $[\text{AgAu}(\text{dcpm})_2]^{2+}$  dication. Nominal masses of isolated precursor P and fragment ions  $F_i$  are indicated. Charge states, fragment formula and losses are shown. Fragments are categorized into ionic and neutral losses. Percentages of total fragment yields were displayed for CID (excitation amplitude = 1.2 V) and UV PD ( $\lambda_{\text{ex}} = 268 \text{ nm}$ ,  $2 \mu\text{J}$ ), respectively.

| Label           | Isolation                                                               | m/z     | z | Loss                                            | Category | CID /PD [%] |
|-----------------|-------------------------------------------------------------------------|---------|---|-------------------------------------------------|----------|-------------|
| P               | $[\text{AgAu}(\text{dcpm})_2]^{2+}$                                     | 560     | 2 |                                                 |          |             |
| F <sub>1</sub>  | $[\text{AgAu}(\text{CH}_2)_2\text{P}_4(\text{Cy})_6\text{H}]^+$         | 955     | 1 | "(Cy), (Cy-H)" <sup>++</sup>                    | IF       | ✓/- [0/-]   |
| F <sub>2</sub>  | $[\text{AgAu}(\text{CH}_2)_2\text{P}_3(\text{Cy})_6]^+$                 | 909     | 1 | (PCH <sub>2</sub> Cy) <sub>2</sub> <sup>+</sup> | IF       | ✓/✓ [7/3]   |
| F <sub>3</sub>  | $[\text{AgAu}(\text{CH}_2)_2\text{P}_3(\text{Cy})_5\text{H}]^+$         | 827     | 1 | "2(Cy), (Cy-H)" <sup>++</sup>                   | IF       | ✓/- [1/-]   |
| F <sub>4</sub>  | $[\text{AgAu}(\text{CH}_2)_2\text{P}_4(\text{Cy})_7\text{H}]^{2+}$      | 519     | 2 | (Cy-H)                                          | NL       | ✓/✓ [54/21] |
|                 | $[\text{AgAg}(\text{CH}_2)_2\text{P}_4(\text{Cy})_7]^{2+}$              | (518.5) | 2 | (Cy)                                            | NL       |             |
|                 | $[\text{AgAg}(\text{CH}_2)_2\text{P}_4(\text{Cy})_6(\text{Cy-H})]^{2+}$ | (518)   | 2 | (Cy), H                                         | NL       |             |
| F <sub>5</sub>  | $[\text{AuAg}(\text{CH}_2)_2\text{P}_4(\text{Cy})_6\text{H}]^{2+}$      | 477.5   | 2 | (Cy), (Cy-H)                                    | NL       | ✓/✓ [13/27] |
|                 | $[\text{AuAg}(\text{CH}_2)_2\text{P}_4(\text{Cy})_6]^{2+}$              | (477)   | 2 | 2(Cy)                                           | NL       |             |
| F <sub>6</sub>  | $[\text{Au}(\text{CH}_2)_2\text{P}_4(\text{Cy})_7\text{H}]^{2+}$        | 465.5   |   | Ag <sup>0</sup> , +H                            | NL       | -/✓ [-/2]   |
| F <sub>7</sub>  | $[\text{AuAg}(\text{CH}_2)_2\text{P}_4(\text{Cy})_5\text{H}_3]^{2+}$    | 437     | 2 | 3(Cy-H)                                         | NL       | ✓/✓ [4/25]  |
|                 | $[\text{AuAg}(\text{CH}_2)_2\text{P}_4(\text{Cy})_5\text{H}]^{2+}$      | (436)   | 2 | 2(Cy), (Cy-H)                                   | NL       |             |
| F <sub>8</sub>  | $[\text{AuAg}(\text{CH}_2)_2\text{P}_4(\text{Cy})_4\text{H}_4]^{2+}$    | 396     | 2 | 4(Cy-H)                                         | NL       | ✓/✓ [5/15]  |
|                 | $[\text{AuAg}(\text{CH}_2)_2\text{P}_4(\text{Cy})_4\text{H}_3]^{2+}$    | (395.5) | 2 | (Cy), 3(Cy-H)                                   | NL       |             |
|                 | $[\text{AuAg}(\text{CH}_2)_2\text{P}_4(\text{Cy})_4\text{H}_2]^{2+}$    | (395)   | 2 | 2(Cy), 2(Cy-H)                                  | NL       |             |
| F <sub>9</sub>  | $[\text{AuAg}(\text{CH}_2)_2\text{P}_2(\text{Cy})(\text{Cy-H})_2]^{2+}$ | 313.5   | 2 | (dcpm), 2H                                      | NL       | ✓/✓ [3/0]   |
| F <sub>10</sub> | $[\text{AuAg}(\text{CH}_2)_2\text{P}_2(\text{Cy})_2]^{2+}$              | 273     | 2 | (dcpm), 2(Cy)                                   | NL       | ✓/✓ [6/1]   |
|                 | $[\text{AuAg}(\text{CH}_2)_2\text{P}_2(\text{Cy})_2\text{-H}]^{2+}$     | 272.5   | 2 | (dcpm), (Cy), (Cy-H)                            | NL       |             |
| F <sub>11</sub> | (PCH <sub>2</sub> Cy) <sub>2</sub> <sup>+</sup>                         | 211     | 1 | $[\text{AgAu}(\text{dcpm})(\text{PCy}_2)]^+$    | IF       | ✓/✓ [0/0]   |

**Tab. S5** Mass spectrometric PD and CID fragment assignments of  $[\text{Au}_2(\text{dcpm})_2]^{2+}$  dication. Nominal masses of isolated precursor P and fragment ions  $F_i$  are indicated. Charge states, fragment formula and losses are shown. Fragments are categorized into ionic and neutral losses. Percentages of total fragment yields were displayed for CID (excitation amplitude = 1.25 V) and UV PD ( $\lambda_{\text{ex}} = 277 \text{ nm}$ , 2  $\mu\text{J}$ ), respectively.

| Label           | Isolation                                                            | m/z     | z | Loss                                                       | Category | CID / PD [%] |
|-----------------|----------------------------------------------------------------------|---------|---|------------------------------------------------------------|----------|--------------|
| P               | $[\text{Au}_2(\text{dcpm})_2]^{2+}$                                  | 605     | 2 |                                                            |          |              |
| F <sub>1</sub>  | $[\text{Au}_2(\text{CH}_2)_2\text{P}_4(\text{Cy})_7]^+$              | 1127    | 1 | (Cy) <sup>+</sup>                                          | IF       | ✓/- [1/0]    |
| F <sub>2</sub>  | $[\text{Au}_2(\text{CH}_2)_2\text{P}_4(\text{Cy})_6\text{H}]^+$      | 1045    | 1 | "(Cy), (Cy-H)" <sup>+</sup>                                | IF       | ✓/- [1/0]    |
| F <sub>3</sub>  | $[\text{Au}_2(\text{CH}_2)\text{P}_3(\text{Cy})_6]^+$                | 999     | 1 | (PCH <sub>2</sub> Cy <sub>2</sub> ) <sup>+</sup>           | IF       | ✓/✓ [7/7]    |
| F <sub>4</sub>  | $[\text{Au}_2(\text{CH}_2)_2\text{P}_4(\text{Cy})_5\text{H}_2]^+$    | 963     | 1 | "(Cy), -2(Cy-H)" <sup>+</sup>                              | IF       | ✓/- [1/0]    |
|                 | $[\text{Au}_2(\text{CH}_2)_2\text{P}_4(\text{Cy})_5]^+$              | (961)   | 1 | "3(Cy)" <sup>+</sup>                                       | IF       |              |
| F <sub>5</sub>  | $[\text{Au}_2(\text{CH}_2)\text{P}_3(\text{Cy})_5\text{H}]^+$        | 917     | 1 | (PCH <sub>2</sub> Cy <sub>2</sub> (Cy-H)) <sup>+</sup>     | IF       | ✓/- [1/0]    |
| F <sub>6</sub>  | $[\text{Au}_2(\text{CH}_2)\text{P}_3(\text{Cy})_4\text{H}_2]^+$      | 835     | 1 | (PCH <sub>2</sub> Cy <sub>2</sub> ) <sup>+</sup> , 2(Cy-H) | IF       | ✓/- [1/0]    |
|                 | $[\text{Au}_2(\text{CH}_2)\text{P}_3(\text{Cy})_4]^+$                | (833)   | 1 | (PCH <sub>2</sub> Cy <sub>2</sub> ) <sup>+</sup> , 2(Cy)   | IF       |              |
| F <sub>7</sub>  | $[\text{Au}_2(\text{CH}_2)_2\text{P}_4(\text{Cy})_7\text{H}]^{2+}$   | 564     | 2 | (Cy-H)                                                     | NL       | ✓/✓ [59/12]  |
|                 | $[\text{Au}_2(\text{CH}_2)_2\text{P}_4(\text{Cy})_7]^{2+}$           | (563.5) | 2 | (Cy)                                                       | NL       |              |
| F <sub>8</sub>  | $[\text{Au}_2(\text{CH}_2)_2\text{P}_4(\text{Cy})_6\text{H}_2]^{2+}$ | 523     | 2 | 2(Cy-H)                                                    | NL       | ✓/✓ [15/19]  |
|                 | $[\text{Au}_2(\text{CH}_2)_2\text{P}_4(\text{Cy})_6]^{2+}$           | (522)   | 2 | 2(Cy)                                                      | NL       |              |
| F <sub>9</sub>  | $[\text{Au}_2(\text{CH}_2)_2\text{P}_4(\text{Cy})_5\text{H}_4]^{2+}$ | 482     | 2 | 3(Cy-H), +H                                                | NL       | ✓/✓ [4/23]   |
|                 | $[\text{Au}_2(\text{CH}_2)_2\text{P}_4(\text{Cy})_5\text{H}_2]^{2+}$ | (481)   | 2 | (Cy), 2(Cy-H)                                              | NL       |              |
| F <sub>10</sub> | $[\text{Au}_2(\text{CH}_2)_2\text{P}_4(\text{Cy})_4\text{H}_4]^{2+}$ | 441     | 2 | 4(Cy-H)                                                    | NL       | ✓/✓ [3/24]   |
|                 | $[\text{Au}_2(\text{CH}_2)_2\text{P}_4(\text{Cy})_4\text{H}_3]^{2+}$ | (440.5) | 2 | (Cy), 3(Cy-H)                                              | NL       |              |
|                 | $[\text{Au}_2(\text{CH}_2)_2\text{P}_4(\text{Cy})_4\text{H}_2]^{2+}$ | (440)   | 2 | 2(Cy), 2(Cy-H)                                             | NL       |              |
| F <sub>11</sub> | $[\text{Au}_2(\text{CH}_2)_2\text{P}_4(\text{Cy})_3\text{H}_5]^{2+}$ | 400     |   | 5(Cy-H)                                                    | NL       | ✓/- [0/-]    |
|                 | $[\text{Au}_2(\text{CH}_2)_2\text{P}_4(\text{Cy})_3\text{H}_4]^{2+}$ | (399.5) | 2 | (Cy), 4(Cy-H)                                              | NL       |              |
|                 | $[\text{Au}_2(\text{CH}_2)_2\text{P}_4(\text{Cy})_3\text{H}_3]^{2+}$ | (399)   | 2 | 2(Cy), 3(Cy-H)                                             | NL       |              |
| F <sub>12</sub> | $[\text{Au}_2(\text{CH}_2)_2\text{P}_4(\text{Cy})_2\text{H}_6]^{2+}$ | 359     | 2 | 6(Cy-H)                                                    | NL       | ✓/- [2/5]    |
|                 | $[\text{Au}_2(\text{CH}_2)_2\text{P}_4(\text{Cy})_2\text{H}_5]^{2+}$ | (358.5) | 2 | (Cy), 5(Cy-H)                                              | NL       |              |
| F <sub>13</sub> | $[\text{Au}_2(\text{CH}_2)_2\text{P}_4(\text{Cy})\text{H}_7]^{2+}$   | 318     | 2 | 7(Cy-H)                                                    | NL       | ✓/- [3/-]    |
|                 | $[\text{Au}_2(\text{CH}_2)_2\text{P}_4(\text{Cy})\text{H}_6]^{2+}$   | (317.5) | 2 | (Cy), -6(Cy-H)                                             | NL       |              |
| F <sub>14</sub> | (PCH <sub>2</sub> Cy <sub>2</sub> ) <sup>+</sup>                     | 211     | 1 | $[\text{Au}_2(\text{dcpm})(\text{PCy}_2)]^+$               | IF       | -/✓ [-/5]    |

### 1.2.3 Mass spectrometric isotope patterns of CID fragment channels

**Tab. S6** Top: Isotope patterns of isolated  $[\text{Cu}_2(\text{dcpm})_2]^{2+}$  precursor ion mass-signals and its CID products. Bottom: Simulated isotope patterns (Gaussian profile,  $m/z = 0.2$  fwhm). Mass-signals normalized to unity for comparison.

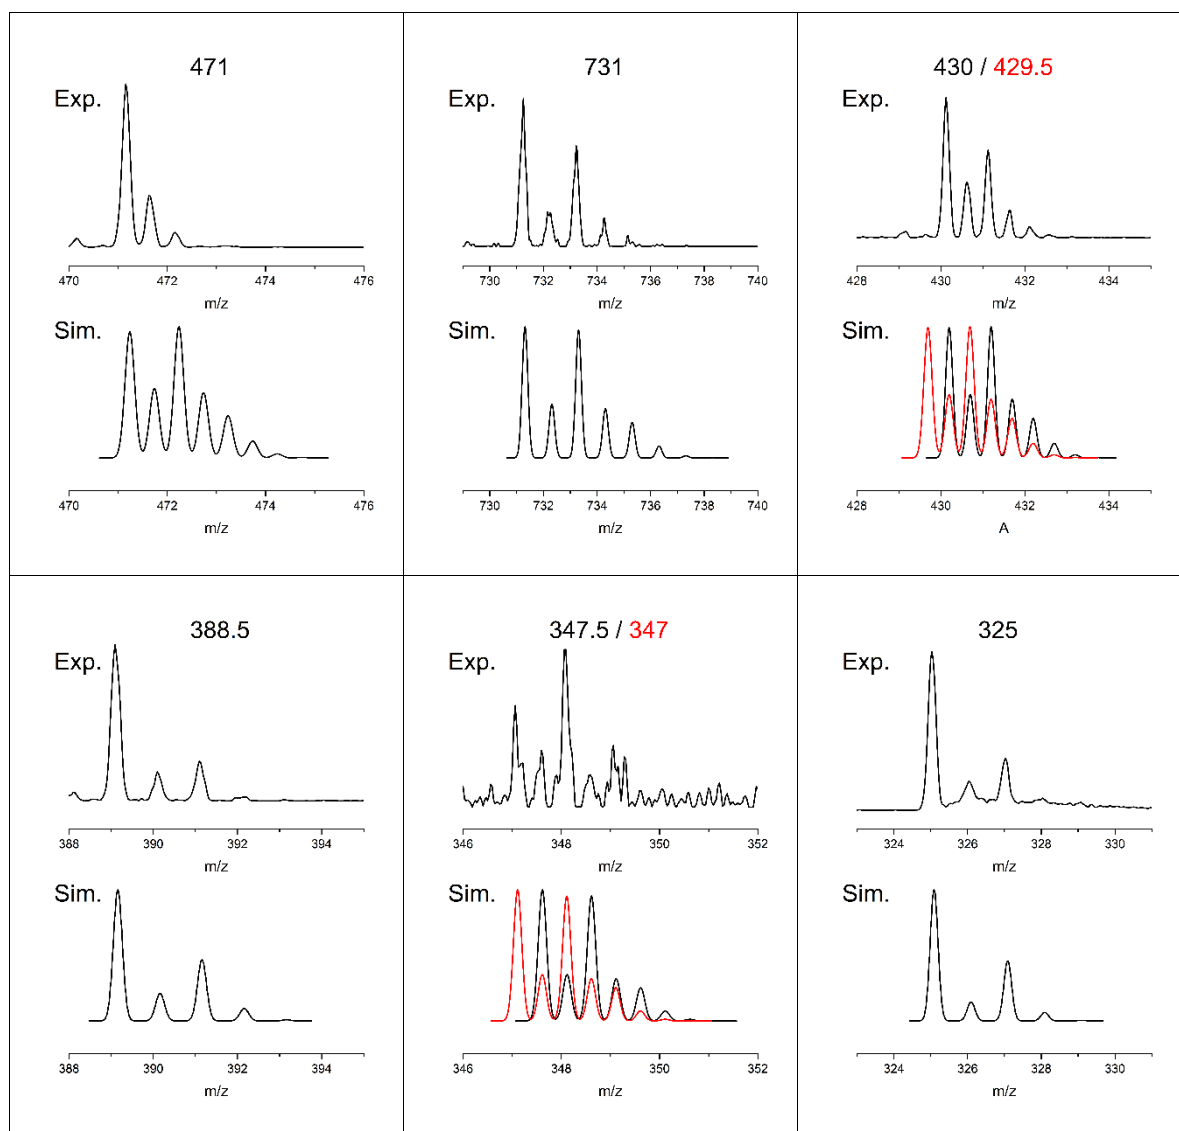

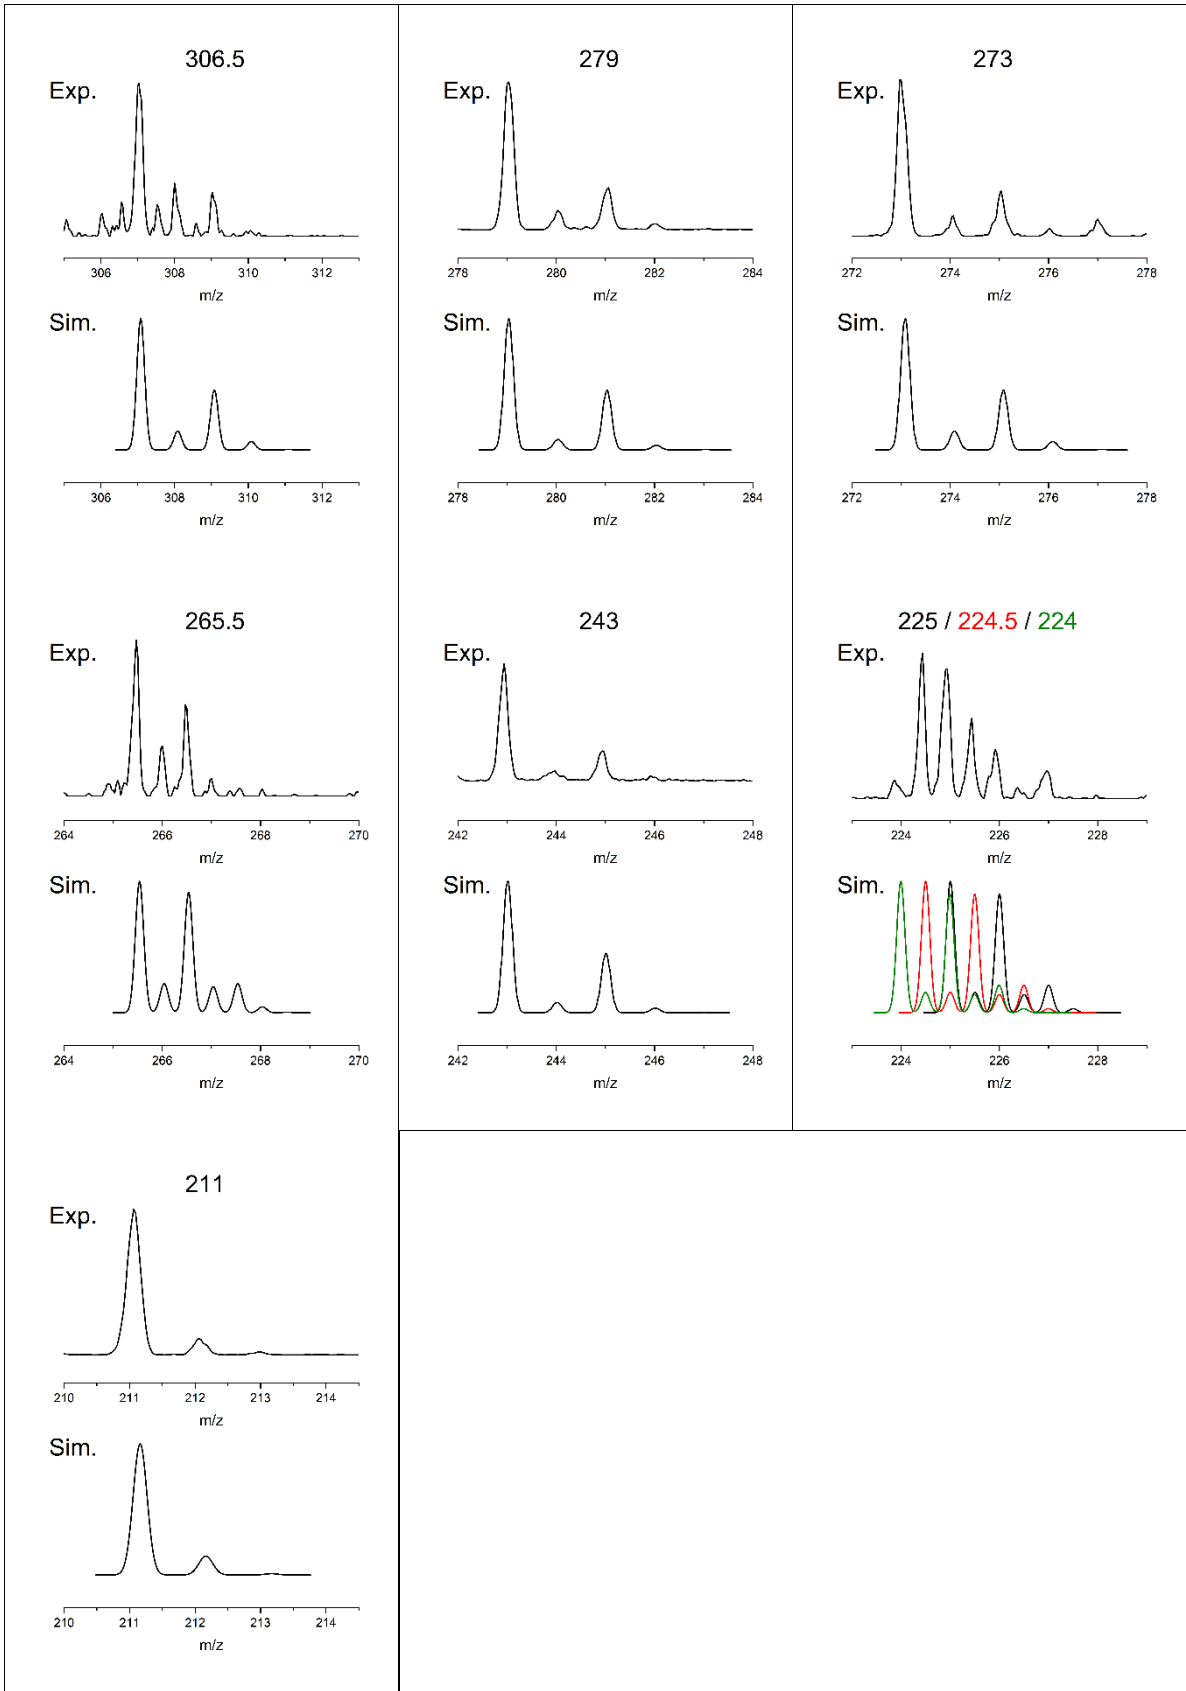

**Tab. S7** Top: Isotope patterns of isolated  $[\text{CuAg}(\text{dcpm})_2]^{2+}$  precursor ion mass-signals and its CID products. Bottom: Simulated isotope patterns (Gaussian profile,  $m/z = 0.2$  fwhm). Mass-signals normalized to unity for comparison.

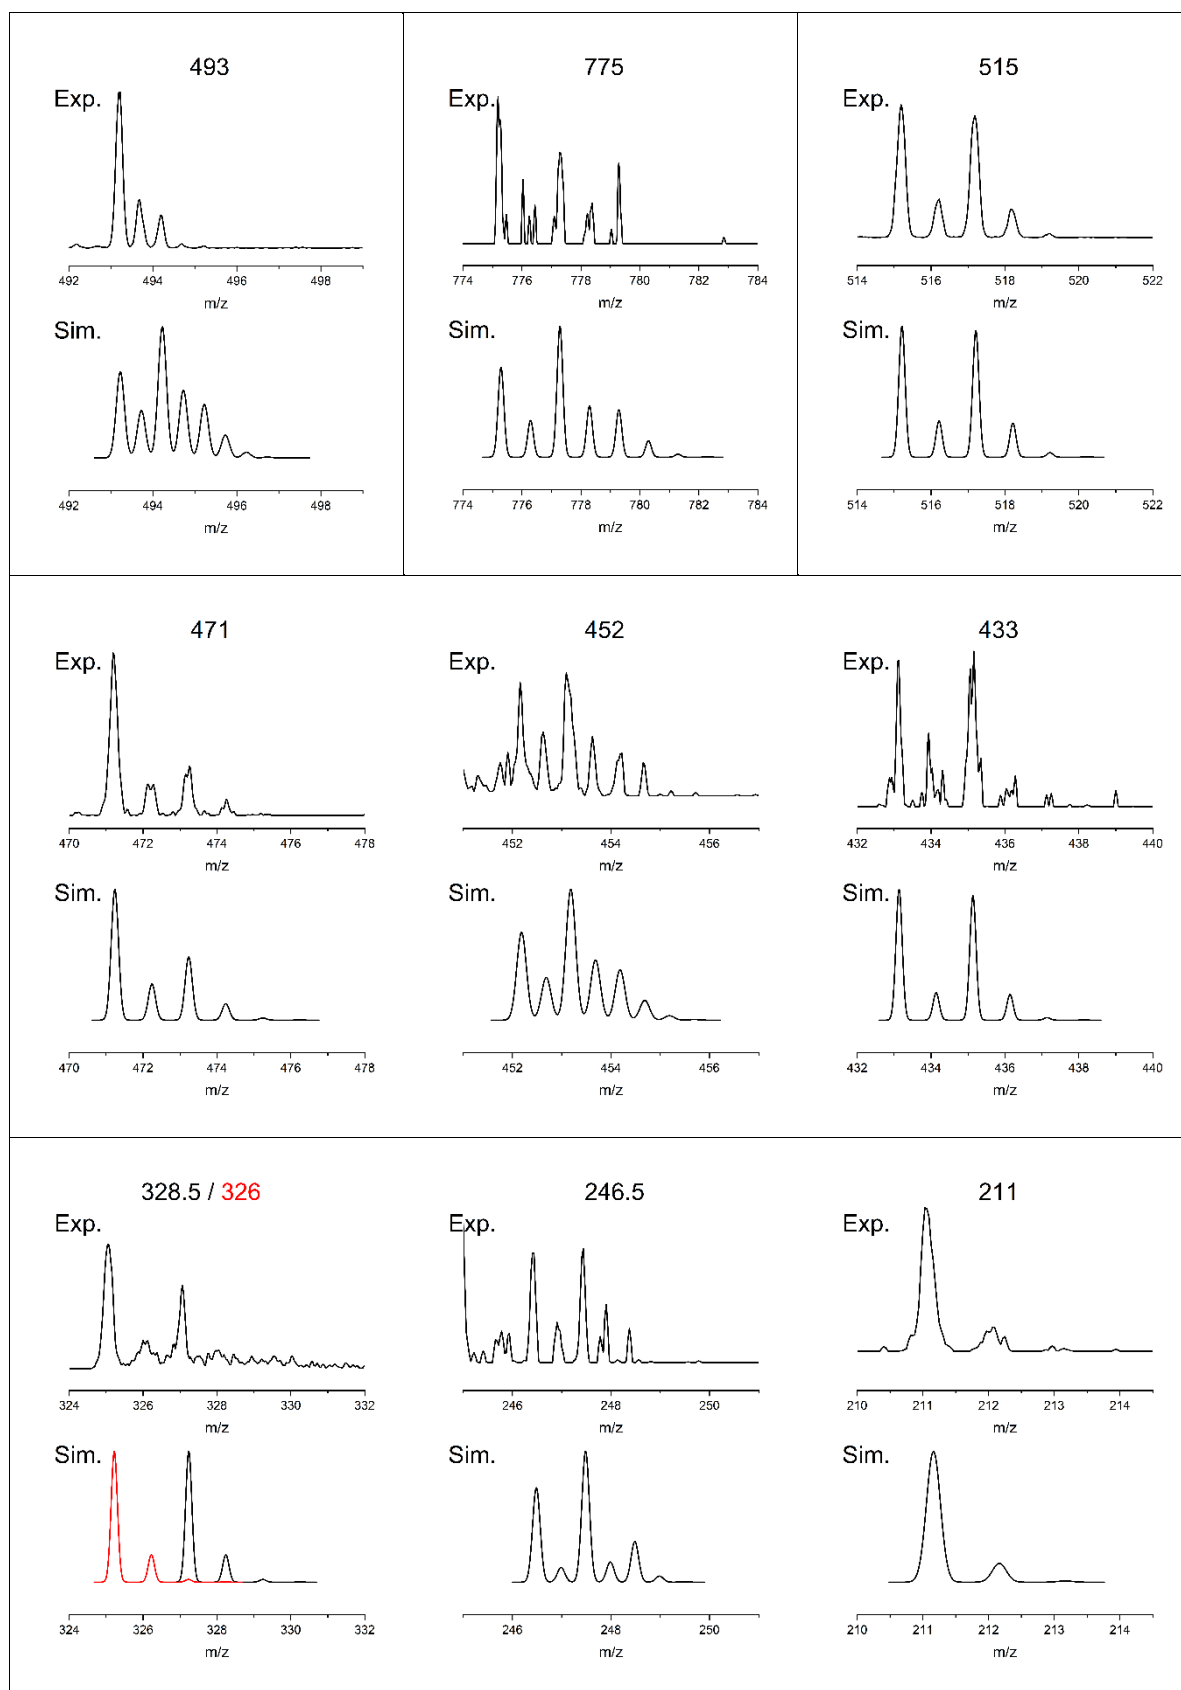



**Tab. S8** Top: Isotope patterns of isolated  $[\text{CuAu}(\text{dcpm})_2]^{2+}$  precursor ion mass-signals and its CID products. Bottom: Simulated isotope patterns (Gaussian profile,  $m/z = 0.2$  fwhm). Mass-signals normalized to unity for comparison.

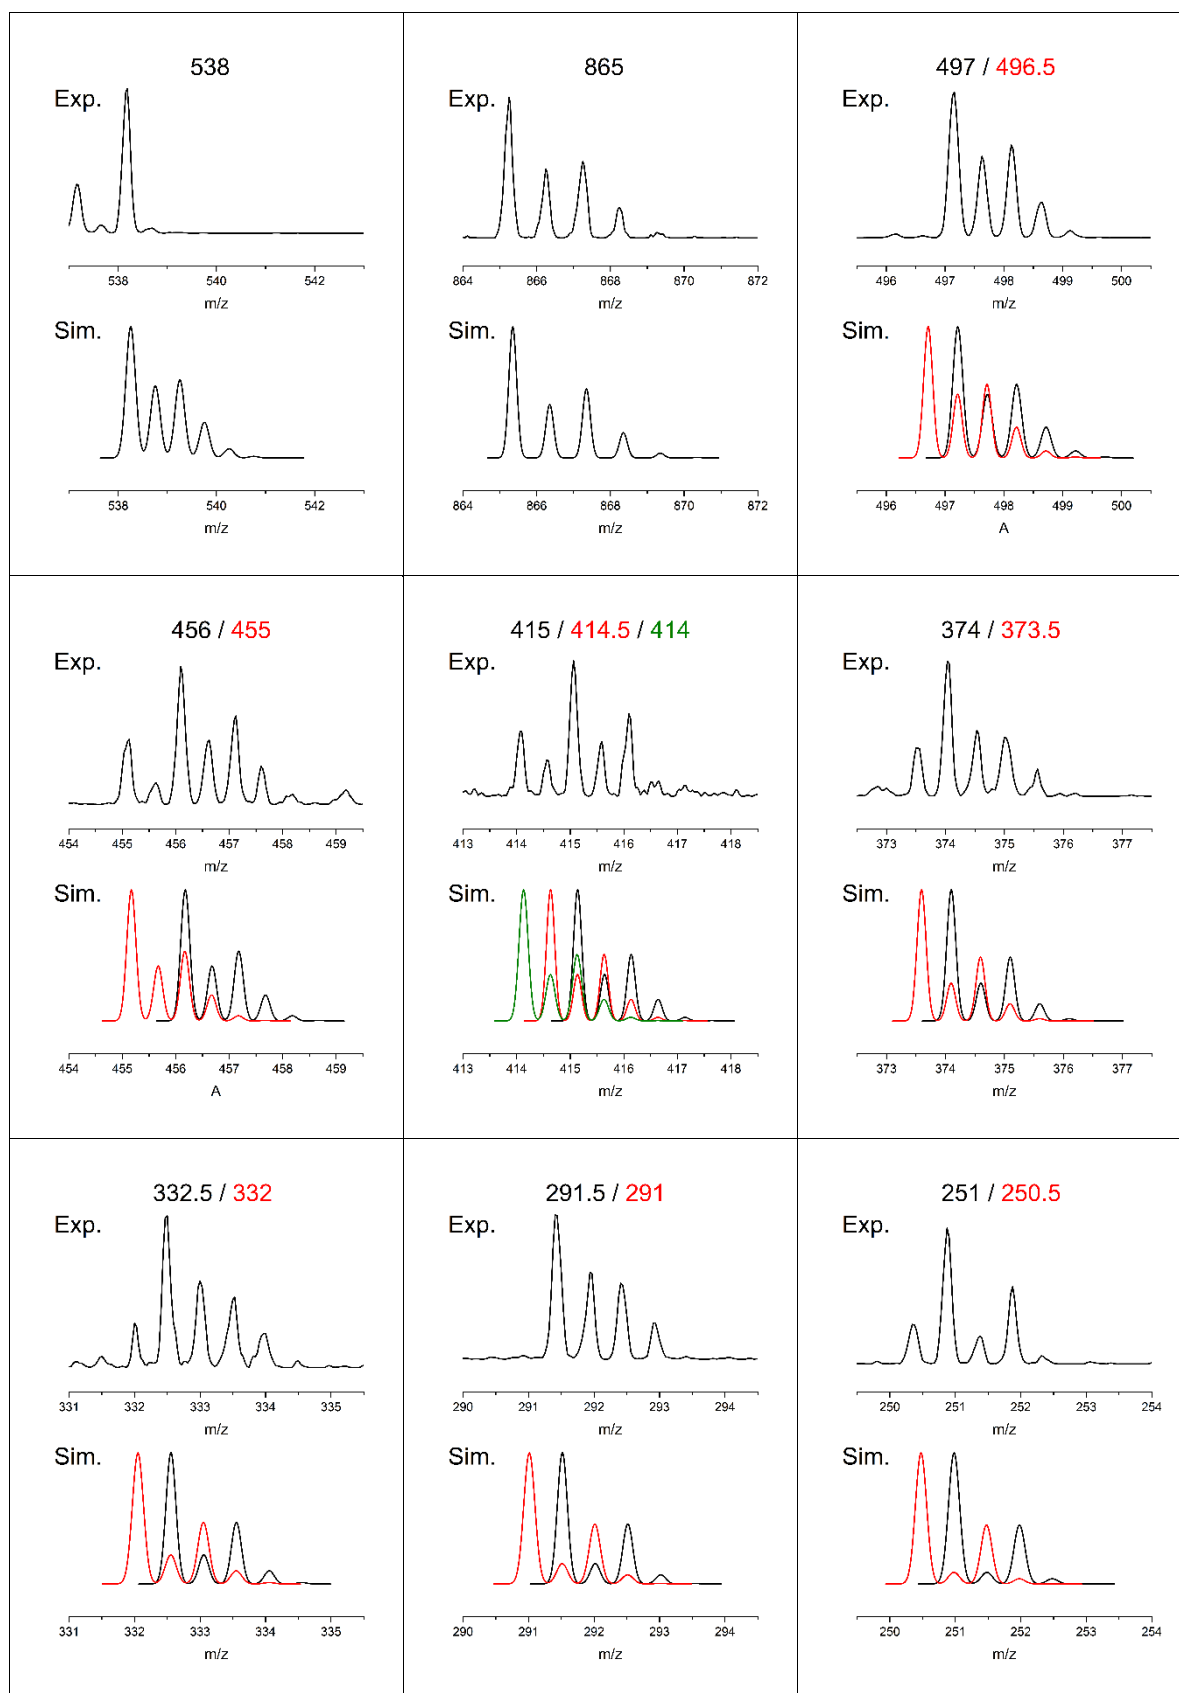

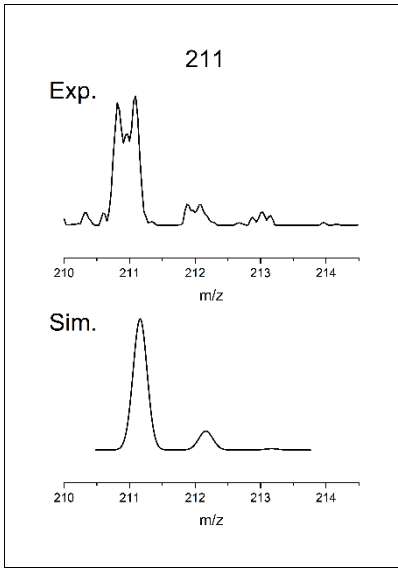

**Tab. S9** Top: Isotope patterns of isolated  $[\text{AgAu}(\text{dcpm})_2]^{2+}$  precursor ion mass-signals and its CID products. Bottom: Simulated isotope patterns (Gaussian profile,  $m/z = 0.2$  fwhm). Mass-signals normalized to unity for comparison.

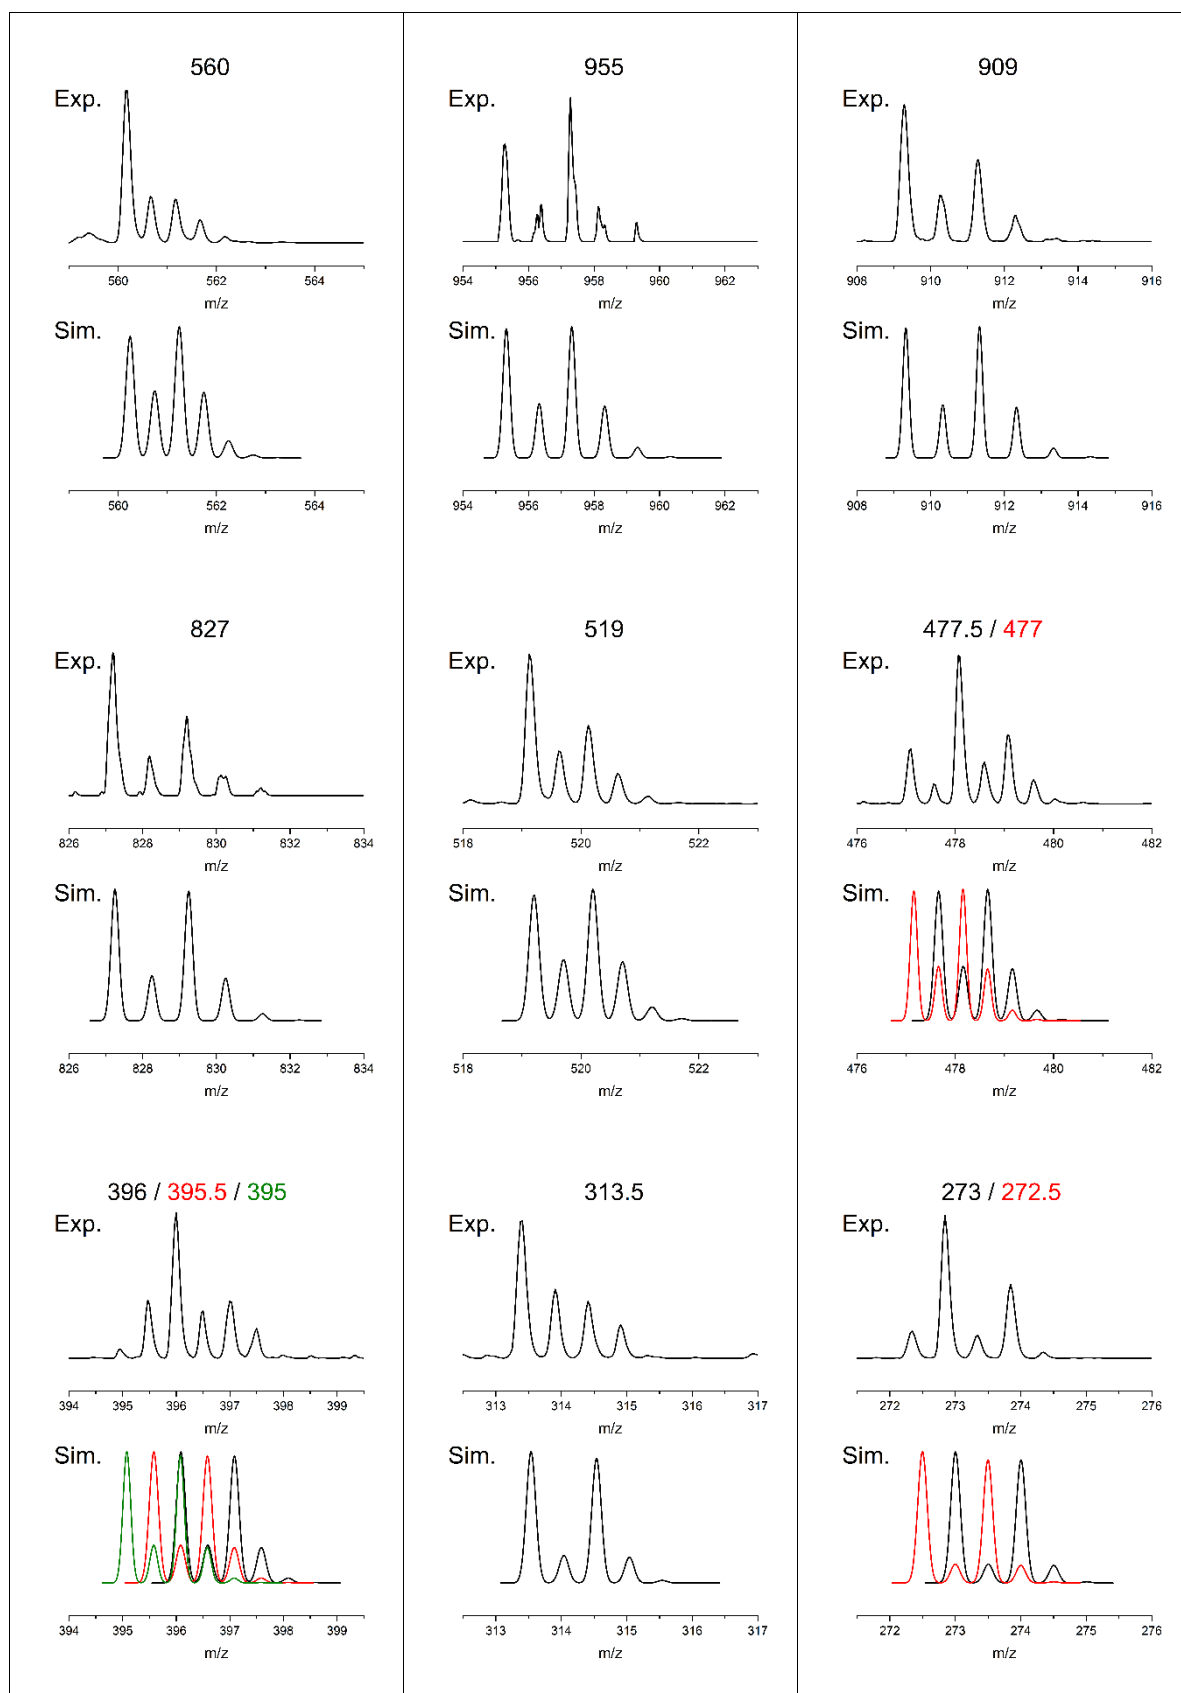

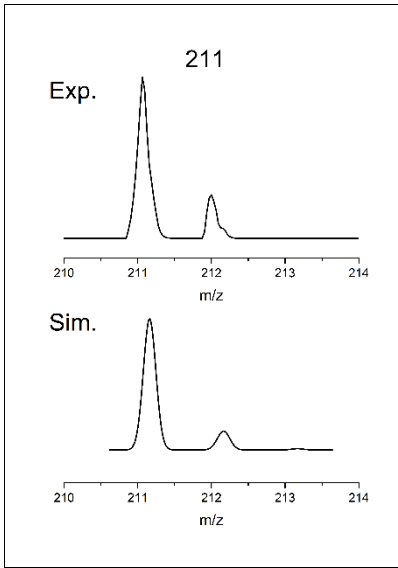

**Tab. S10** Top: Isotope patterns of isolated  $[Au_2(dcpm)_2]^{2+}$  precursor ion mass-signals and its CID products. Bottom: Simulated isotope patterns (Gaussian profile,  $m/z = 0.2$  fwhm). Mass-signals normalized to unity for comparison.

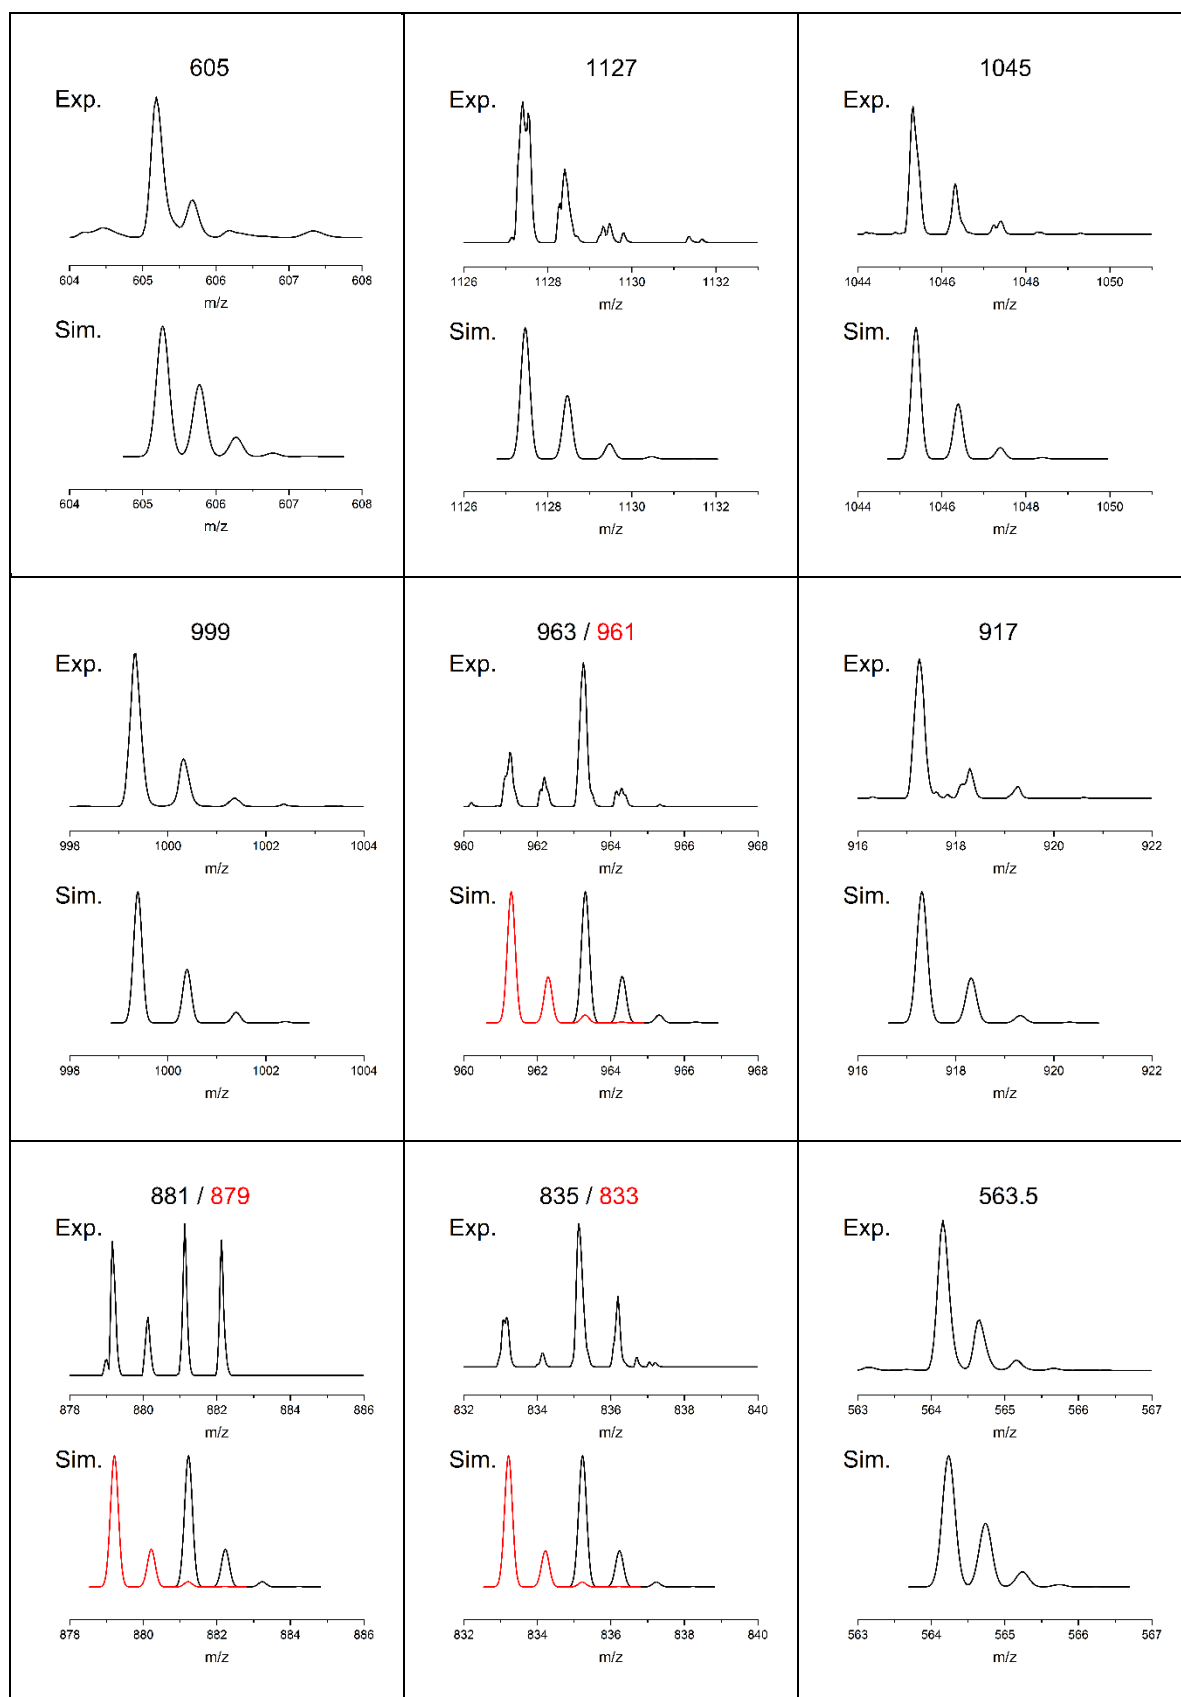

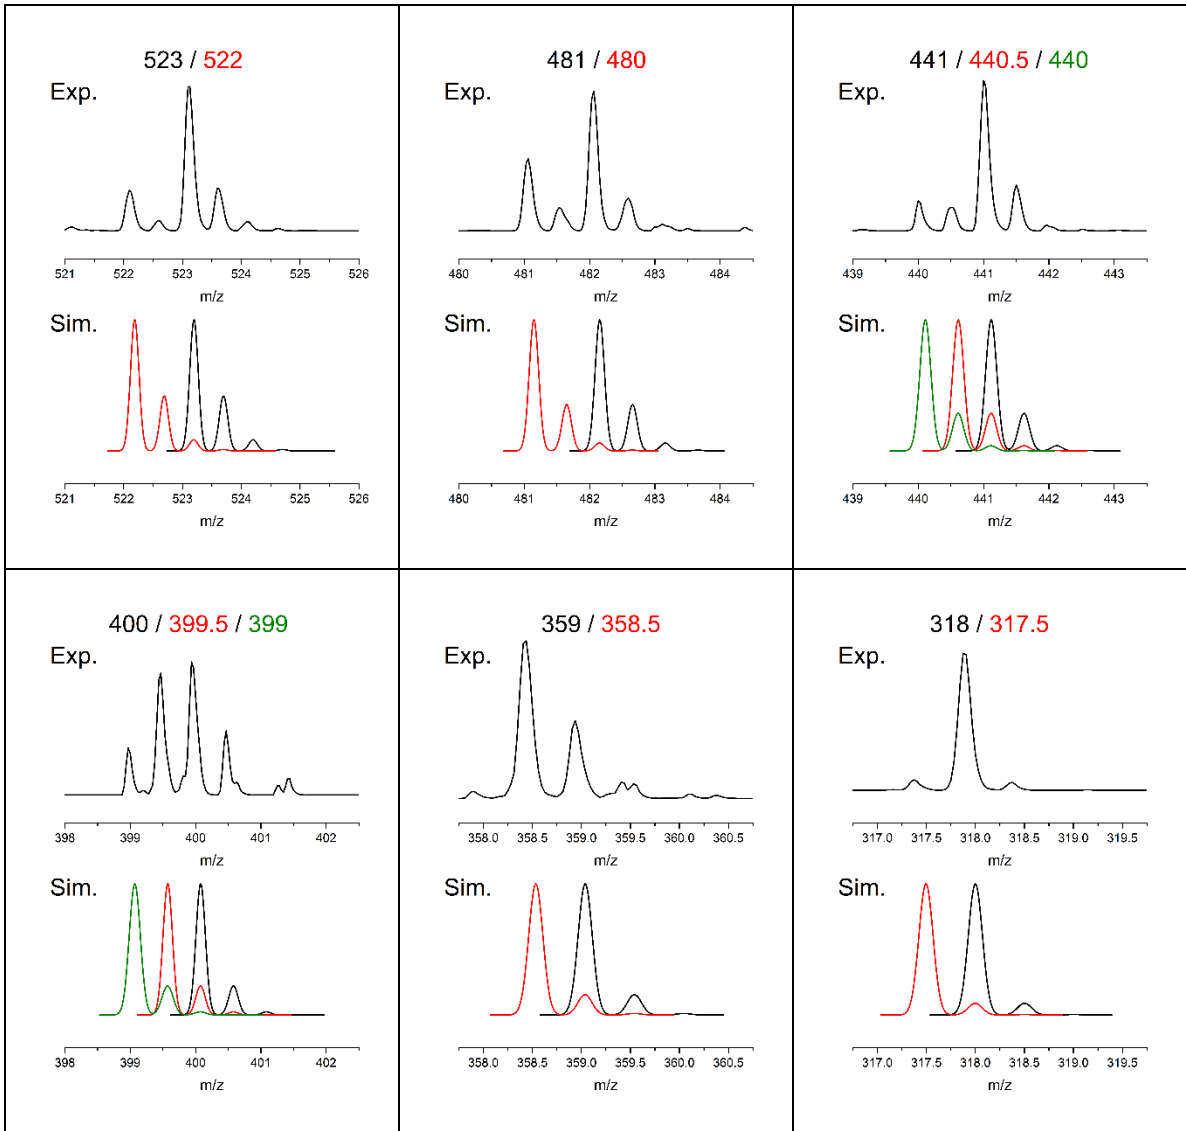

### 1.2.4 CID breakdown and appearance curves of heterobimetallic species

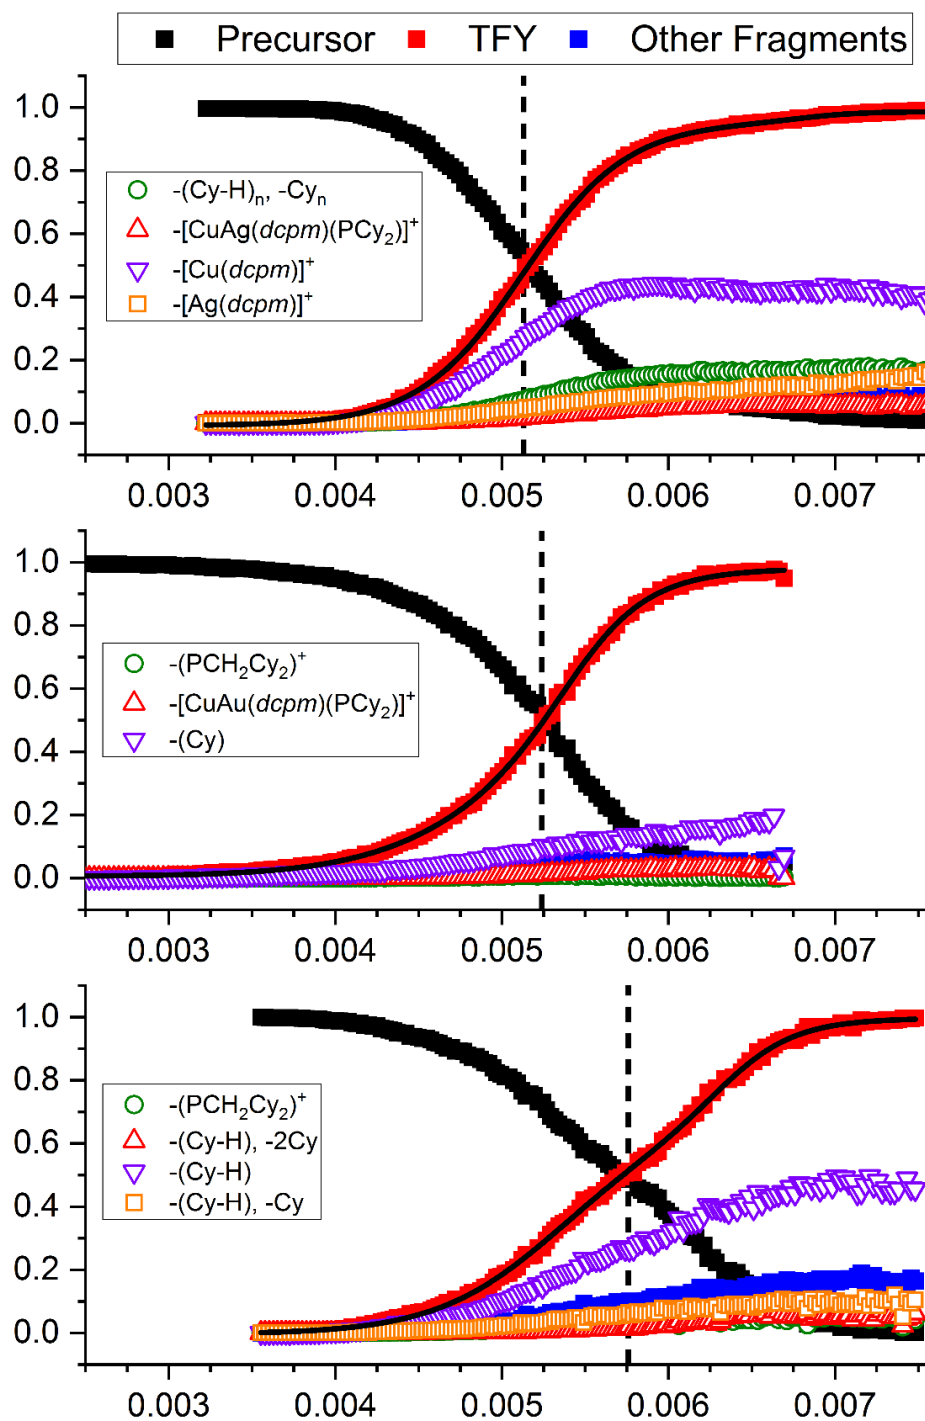

**Fig. S7** CID breakdown (black squares), total fragment yield (red squares) and fragment-specific appearance curves (open symbols) of a)  $[\text{CuAg(dcpm)}_2]^{2+}$ , b)  $[\text{CuAu(dcpm)}_2]^{2+}$  and c)  $[\text{AgAu(dcpm)}_2]^{2+}$ . Dashed vertical lines indicate  $E_{COM}^{50\%}$  values ( $E_{COM} \propto$  collisional energy, frag. time = 40 ms).

## 1.2.5 Mass spectrometric isotope patterns of femtosecond PD fragment channels

**Tab. S11** Top: Isotope patterns of isolated  $[\text{Cu}_2(\text{dcpm})_2]^{2+}$  precursor ion mass-signals and its photofragment products ( $\lambda_{\text{ex}} = 297.5 \text{ nm}$ ,  $E = 2 \mu\text{J}$ ,  $\sim 118$  pulses), recorded with femtosecond laser system. Bottom: Simulated isotope patterns (Gaussian profile,  $m/z = 0.2 \text{ fwhm}$ ). Mass-signals normalized to unity for comparison.

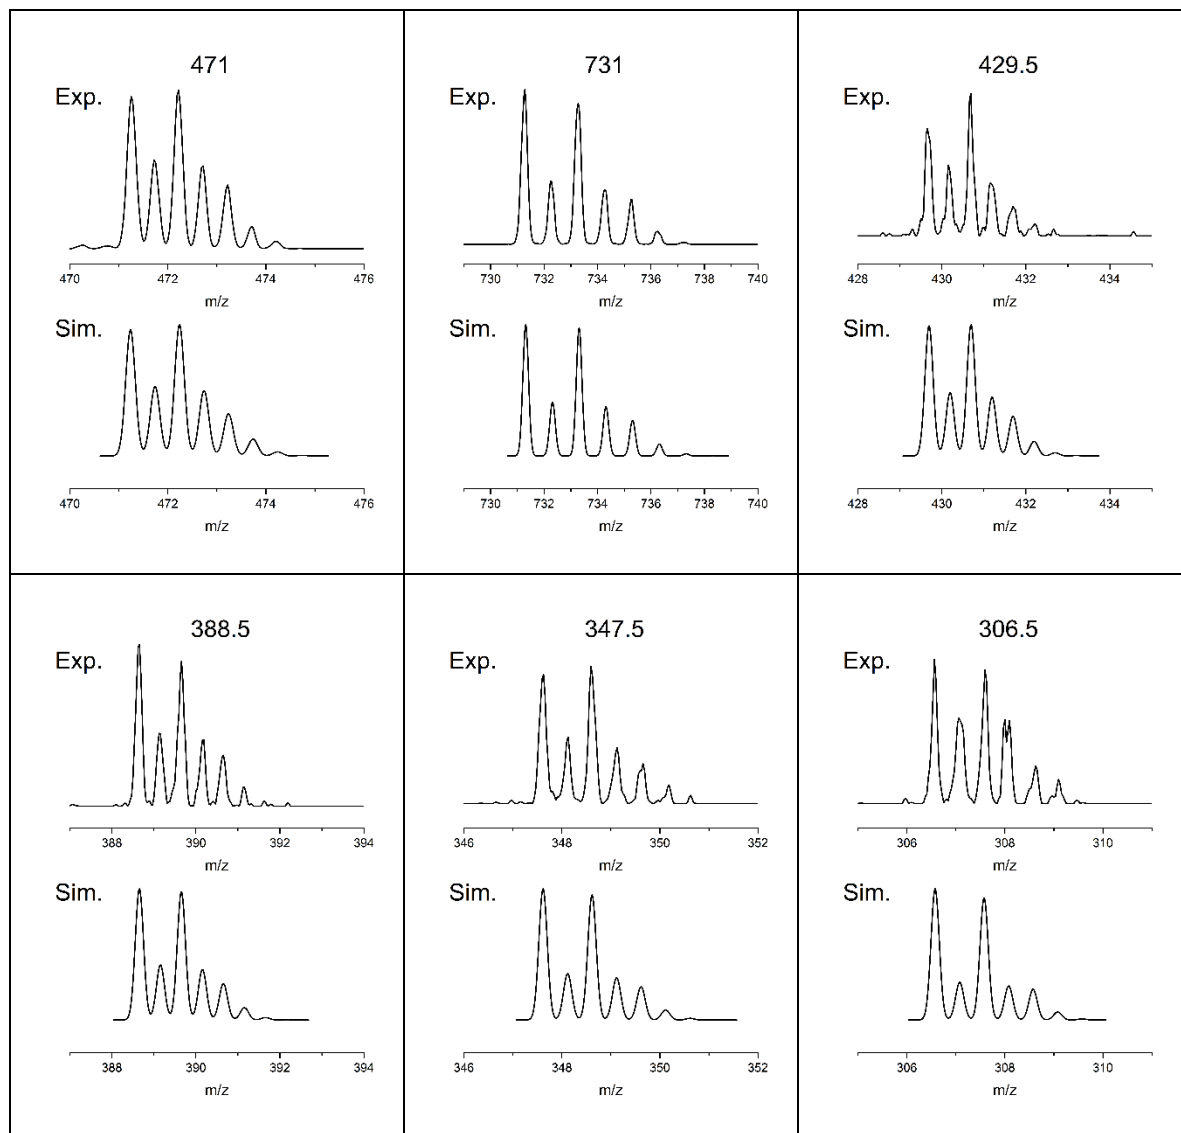



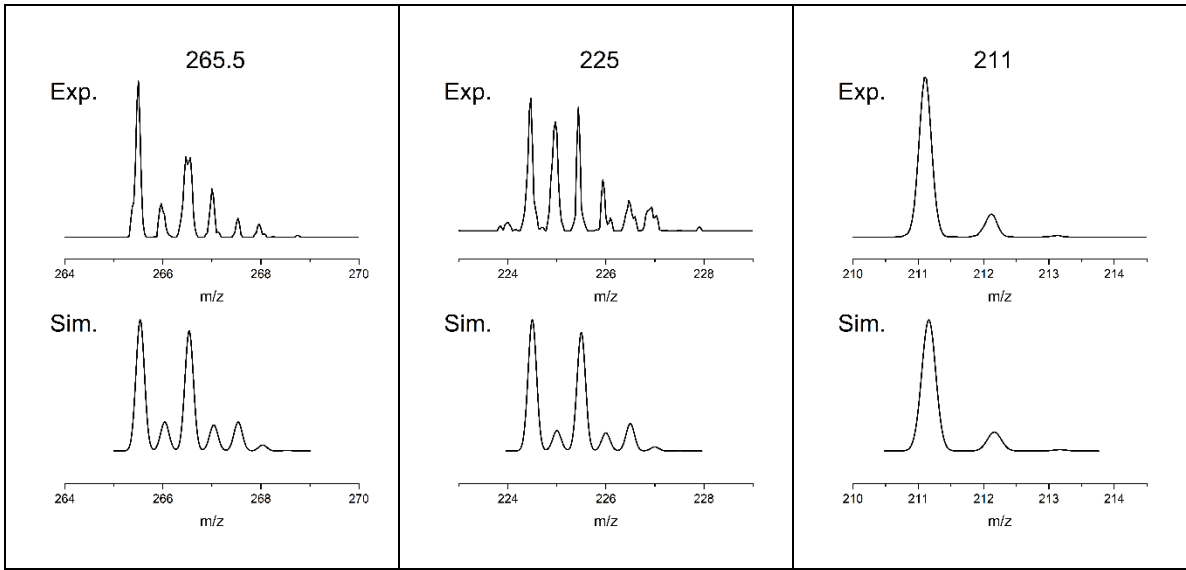

**Tab. S12** Top: Isotope patterns of isolated  $[\text{CuAg}(\text{dcpm})_2]^{2+}$  precursor ion mass-signals and its photofragment products ( $\lambda_{\text{ex}} = 294.5 \text{ nm}$ ,  $E = 2 \mu\text{J}$ ,  $\sim 118$  pulses), recorded with femtosecond laser system. Bottom: Simulated isotope patterns (Gaussian profile,  $m/z = 0.2$  fwhm). Mass-signals normalized to unity for comparison.

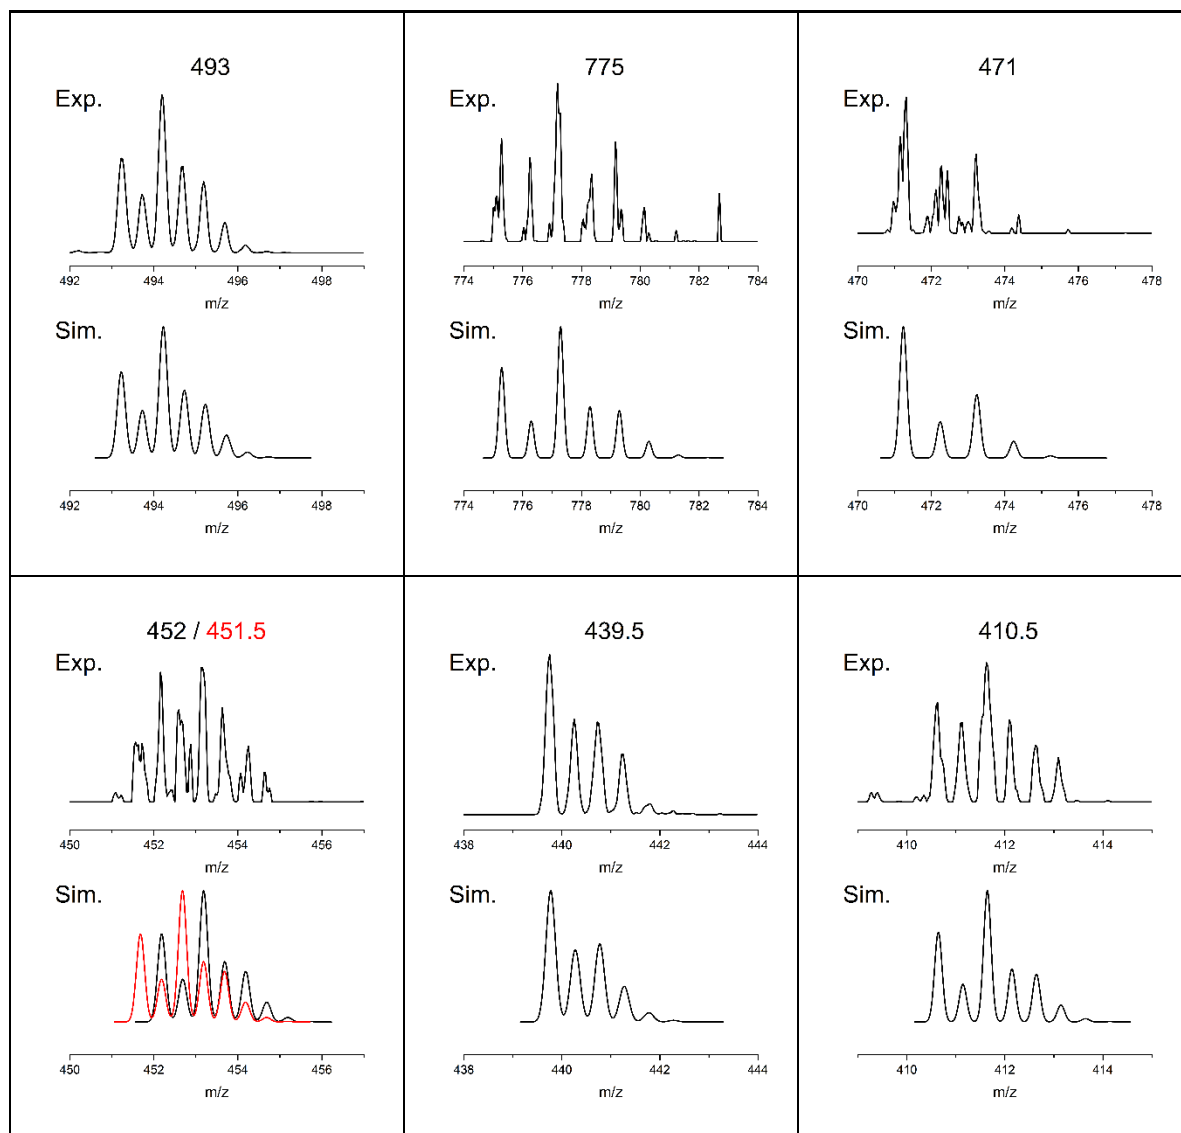

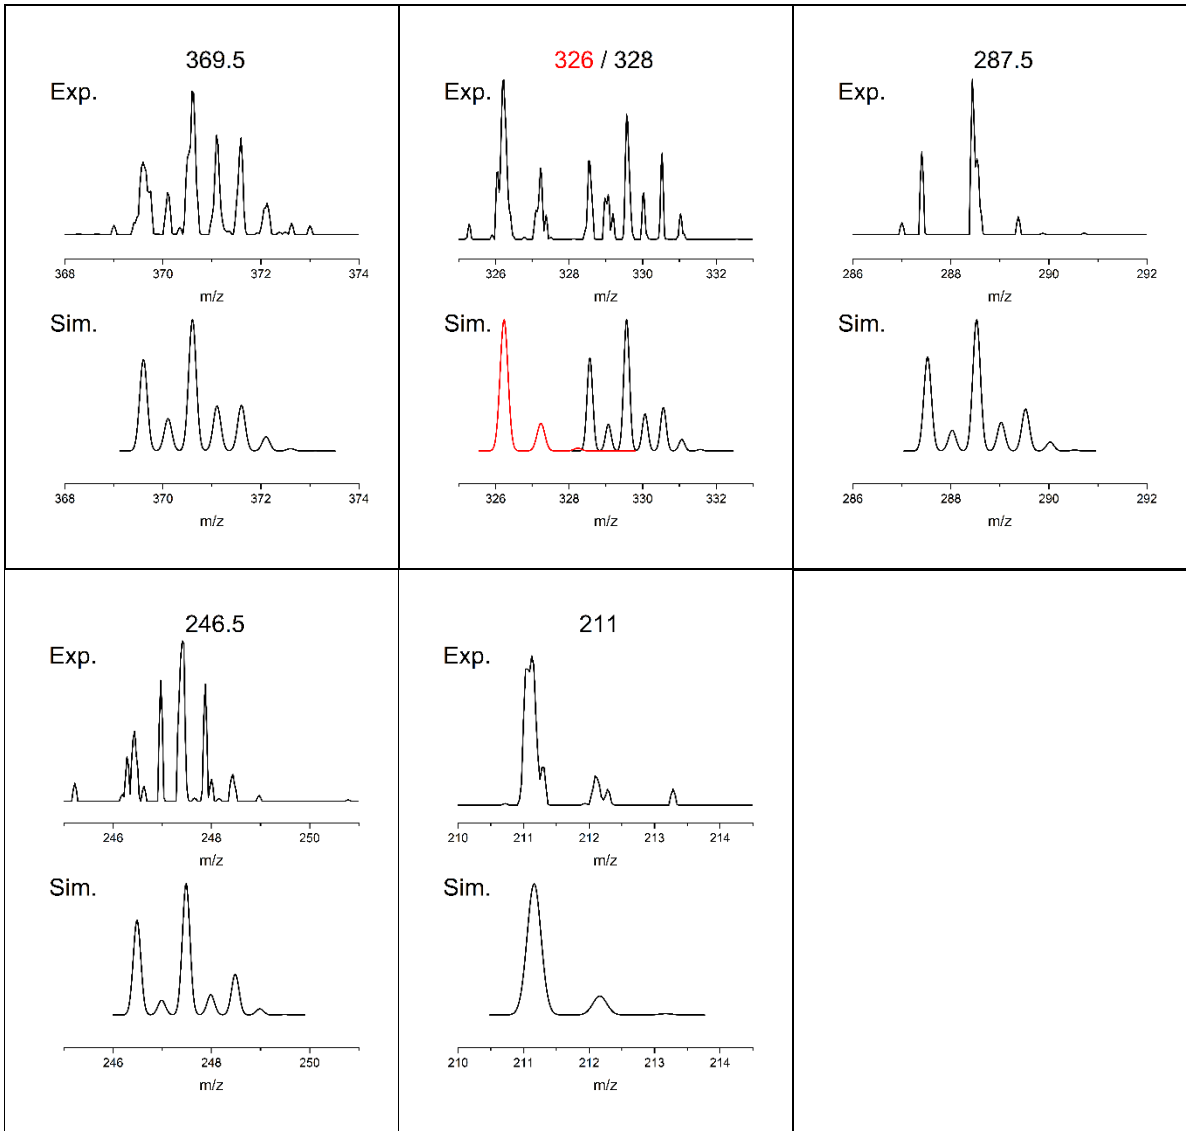

**Tab. S13** Top: Isotope patterns of isolated  $[\text{CuAu}(\text{dcpm})_2]^{2+}$  precursor ion mass-signals and its photofragment products ( $\lambda_{\text{ex}} = 289 \text{ nm}$ ,  $E = 2 \mu\text{J}$ ,  $\sim 118$  pulses ), recorded with femtosecond laser system. Bottom: Simulated isotope patterns (Gaussian profile,  $m/z = 0.2 \text{ fwhm}$ ). Mass-signals normalized to unity for comparison.

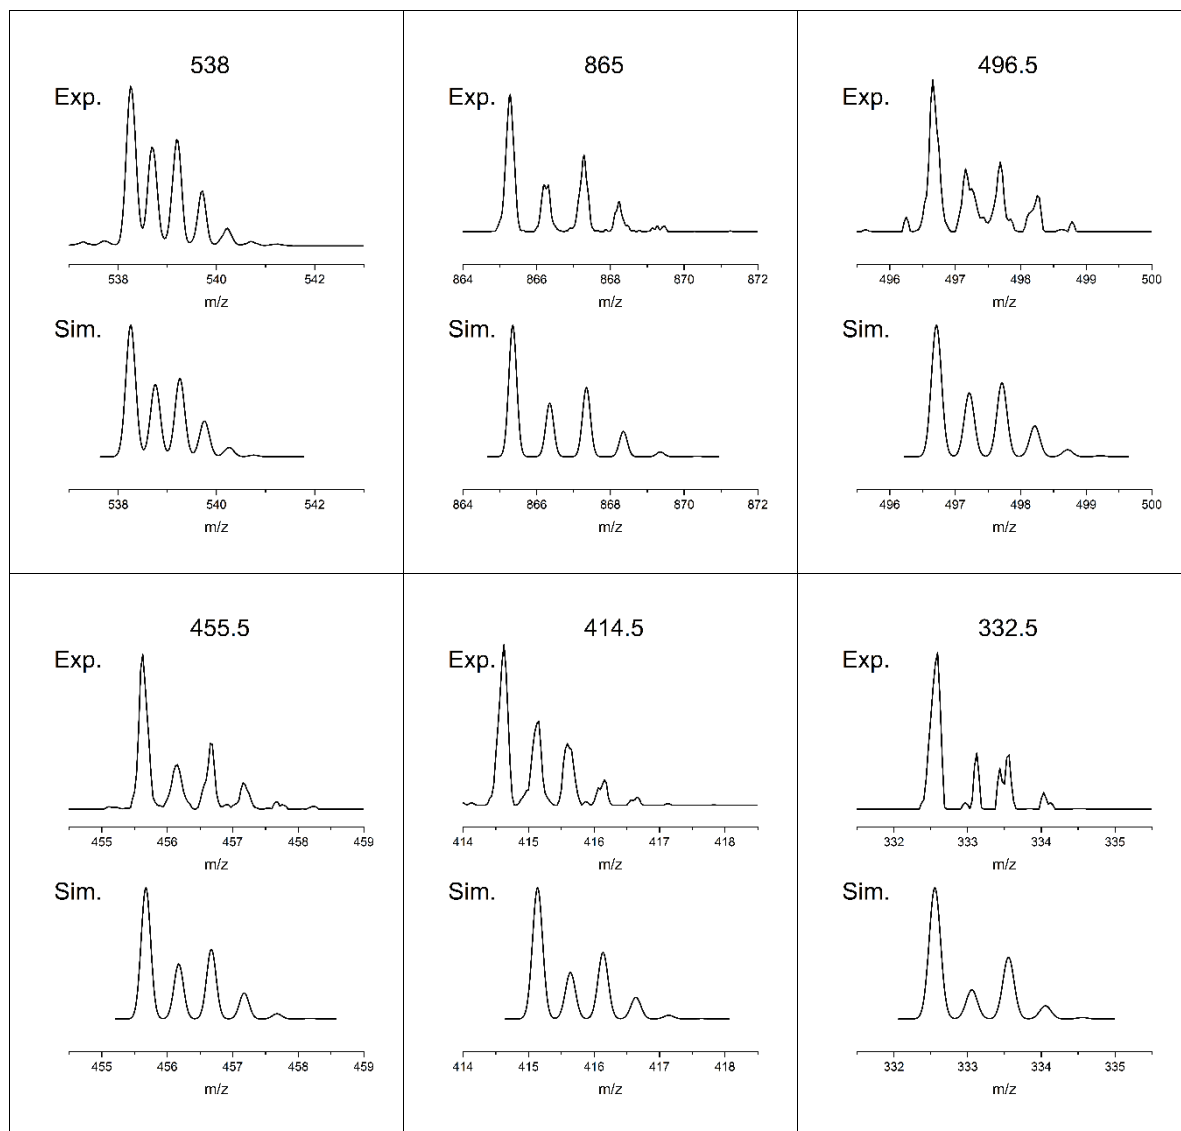

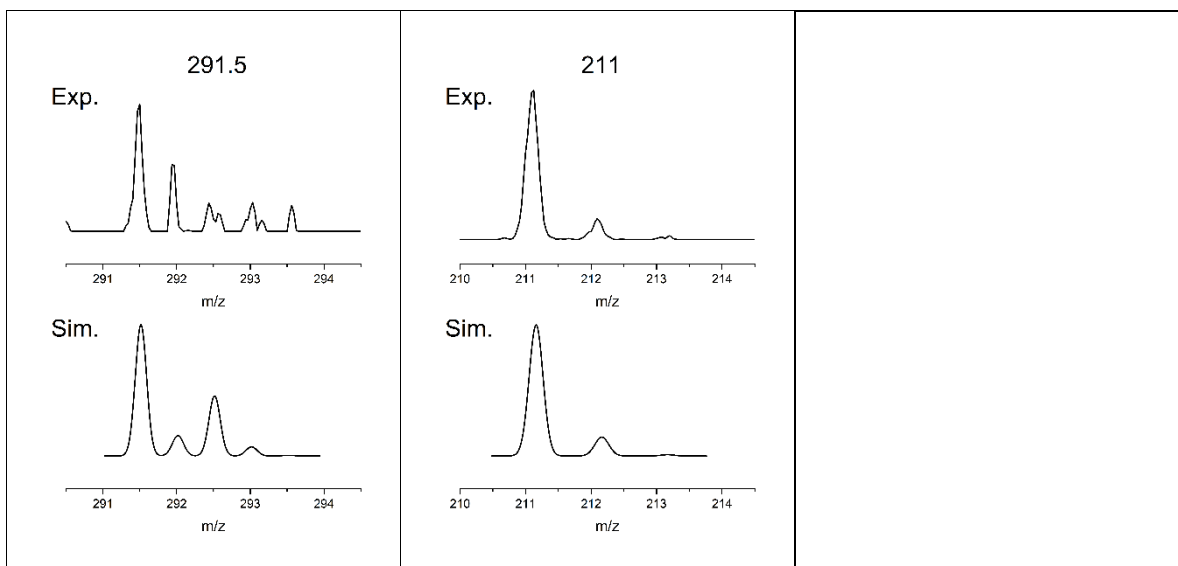

**Tab. S14** Top: Isotope patterns of isolated  $[\text{AgAu}(\text{dcpm})_2]^{2+}$  precursor ion mass-signals and its photofragment products ( $\lambda_{\text{ex}} = 268 \text{ nm}$ ,  $E = 2 \mu\text{J}$ ,  $\sim 118$  pulses), recorded with femtosecond laser system. Bottom: Simulated isotope patterns (Gaussian profile,  $m/z = 0.2$  fwhm). Mass-signals normalized to unity for comparison.

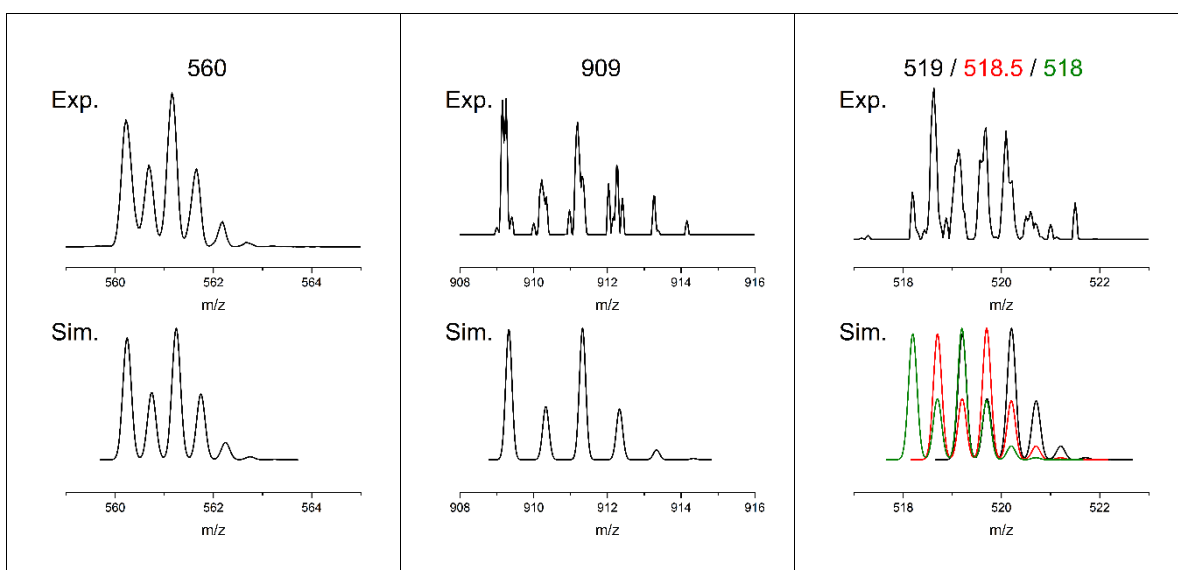

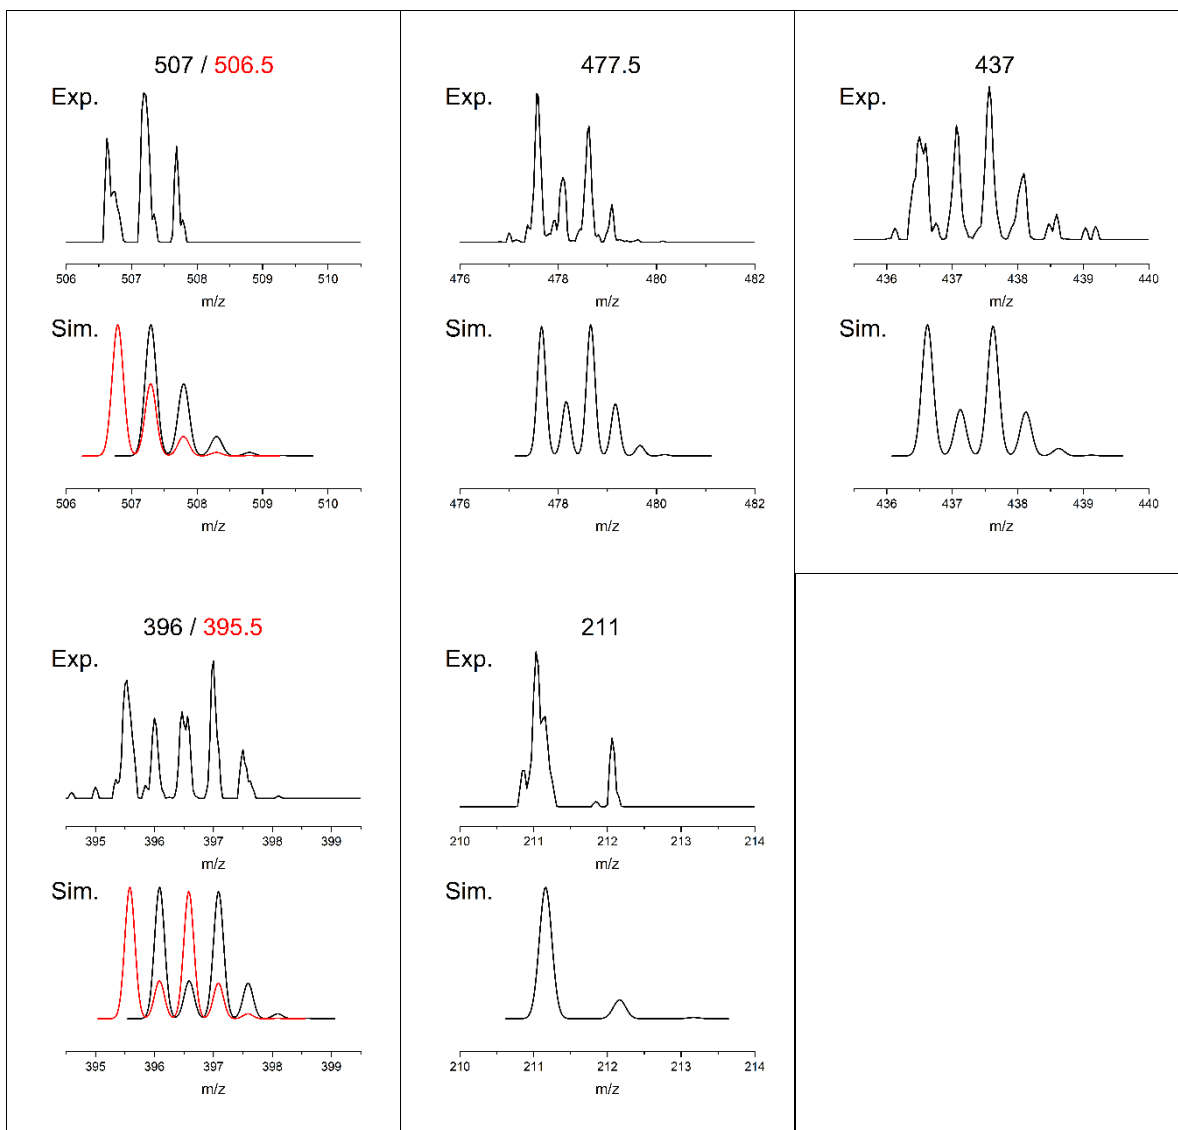

**Tab. S15** Top: Isotope patterns of isolated  $[Au_2(dcpm)_2]^{2+}$  precursor ion mass-signals and its photofragment products ( $\lambda_{ex} = 277$  nm,  $E = 2 \mu J$ ,  $\sim 118$  pulses), recorded with femtosecond laser system. Bottom: Simulated isotope patterns (Gaussian profile,  $m/z = 0.2$  fwhm). Mass-signals normalized to unity for comparison.

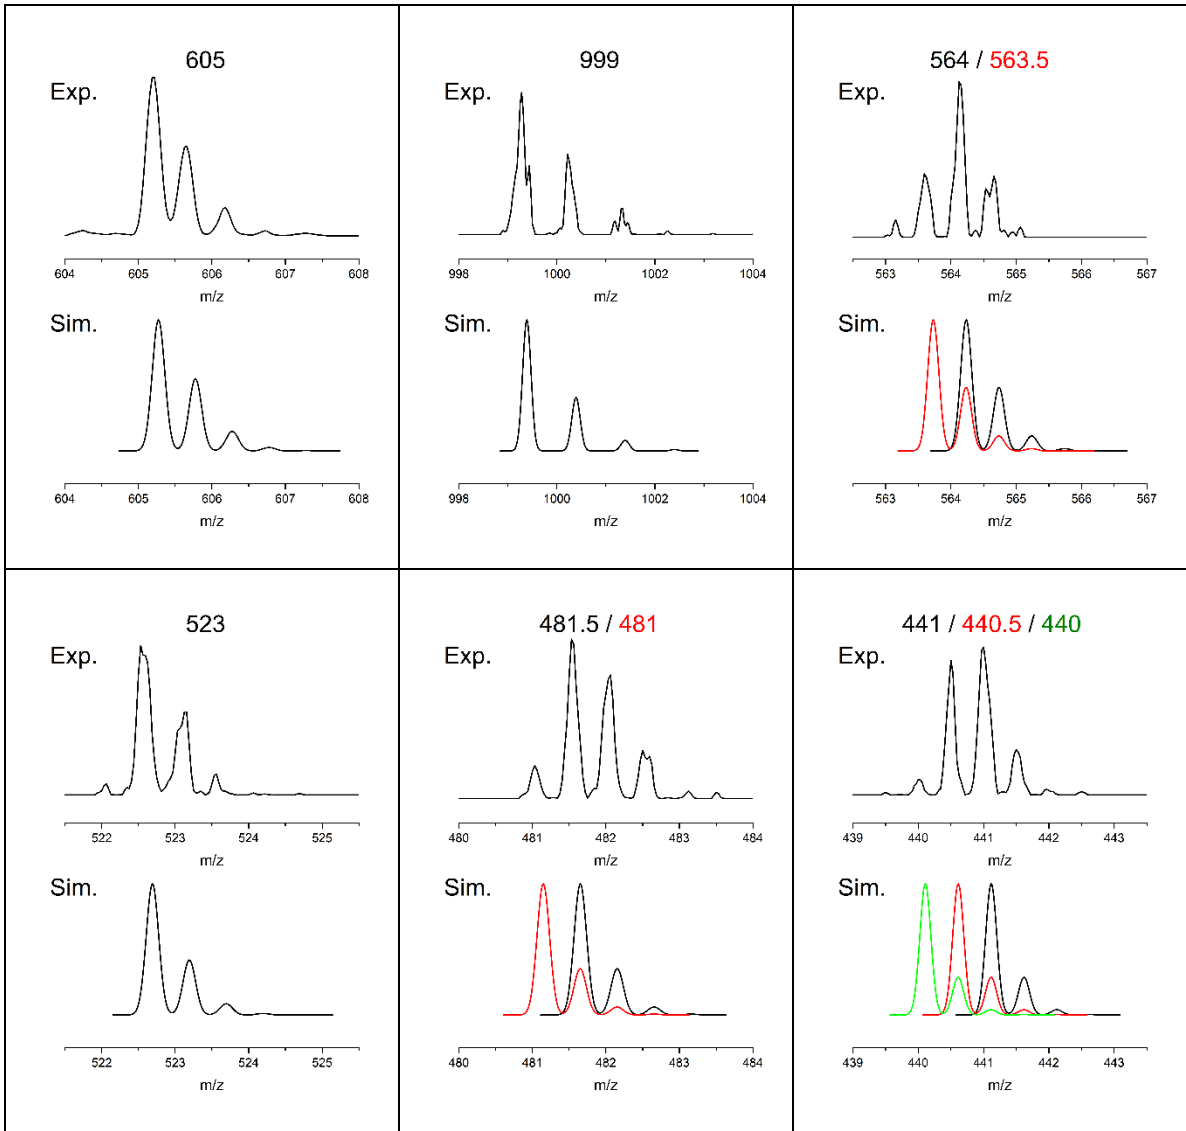

## 1.2.5 Mass spectrometric isotope patterns of nanosecond PD fragment channels

**Tab. S16** Top: Isotope patterns of isolated  $[\text{Cu}_2(\text{dcpm})_2]^{2+}$  precursor ion mass-signals and its photofragment products ( $\lambda_{\text{ex}} = 297 \text{ nm}$ ,  $E = 2 \mu\text{J}$ ,  $\sim 118$  pulses), recorded with nanosecond laser system. Bottom: Simulated isotope patterns (Gaussian profile,  $m/z = 0.2$  fwhm). Mass-signals normalized to unity for comparison.

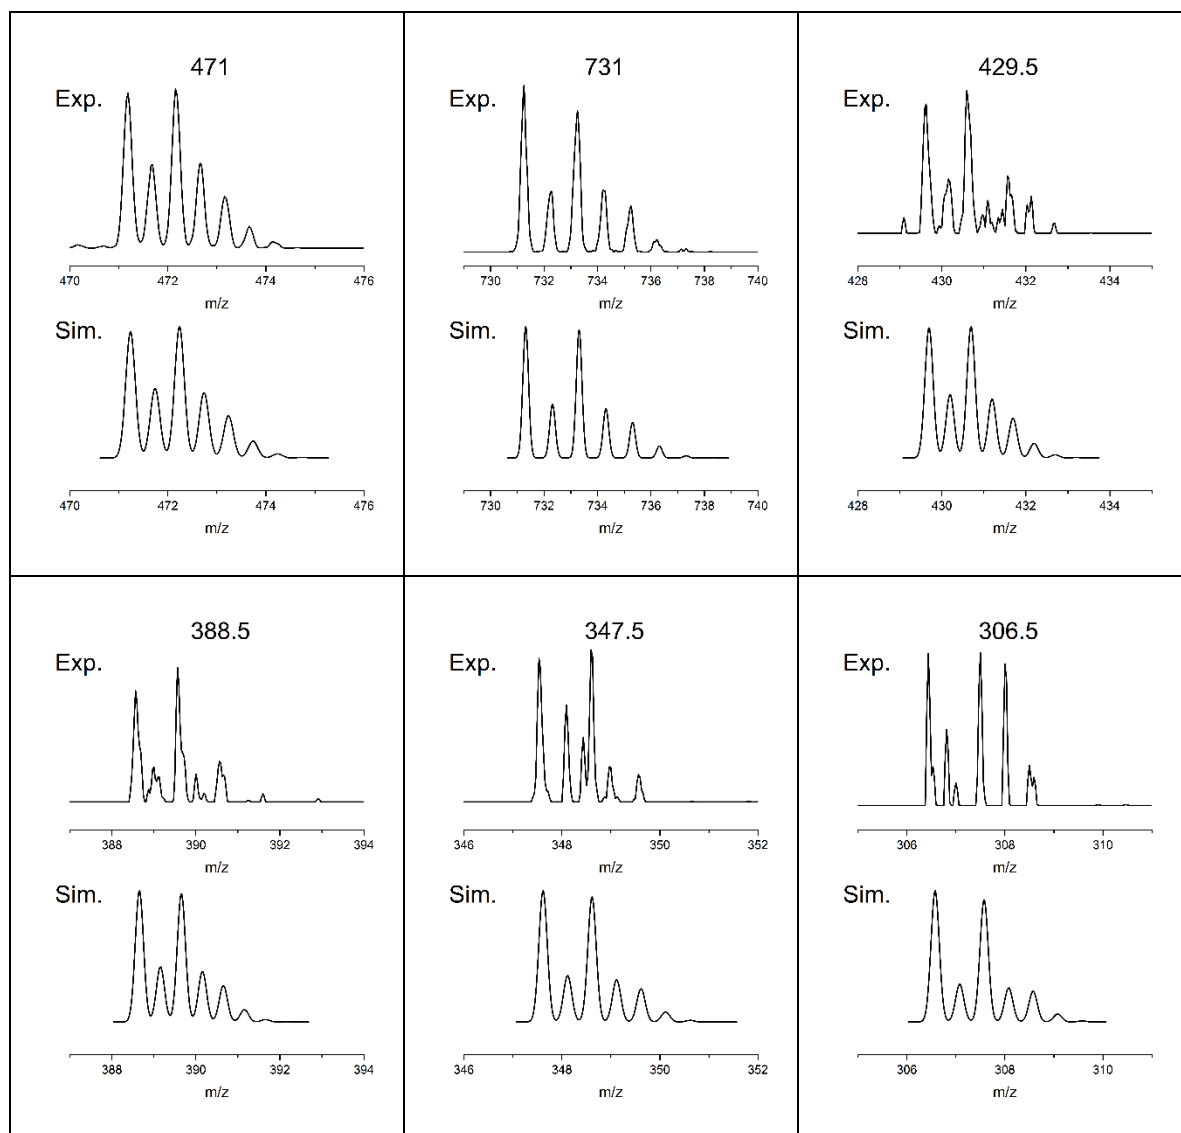



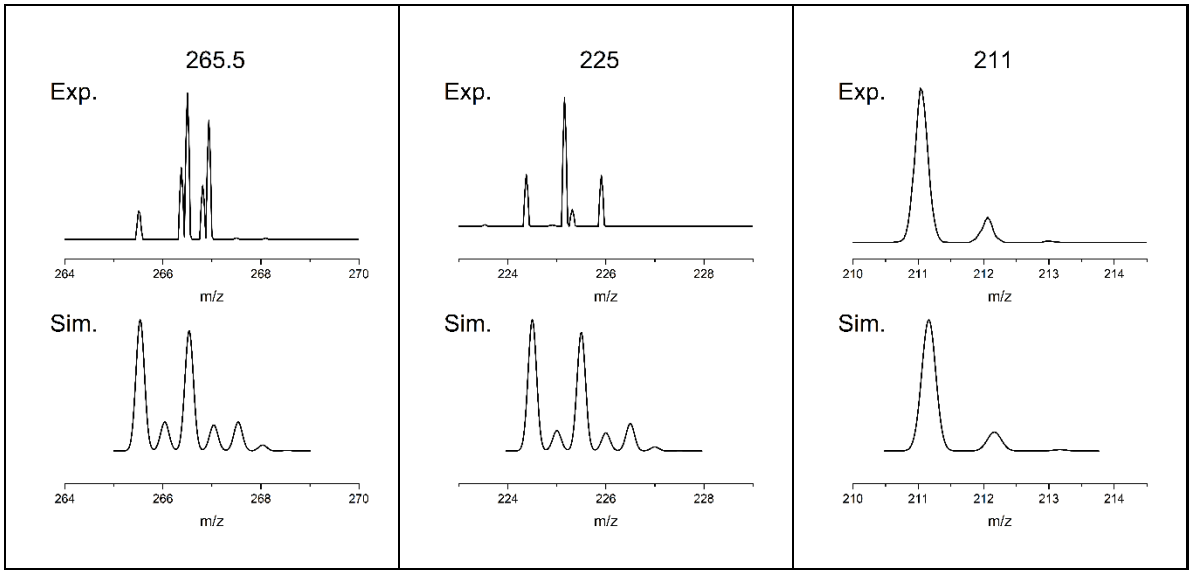

**Tab. S17** Top: Isotope patterns of isolated  $[\text{CuAg}(\text{dcpm})_2]^{2+}$  precursor ion mass-signals and its photofragment products ( $\lambda_{\text{ex}} = 294 \text{ nm}$ ,  $E = 2 \mu\text{J}$ ,  $\sim 118$  pulses), recorded with nanosecond laser system. Bottom: Simulated isotope patterns (Gaussian profile,  $m/z = 0.2$  fwhm). Mass-signals normalized to unity for comparison.

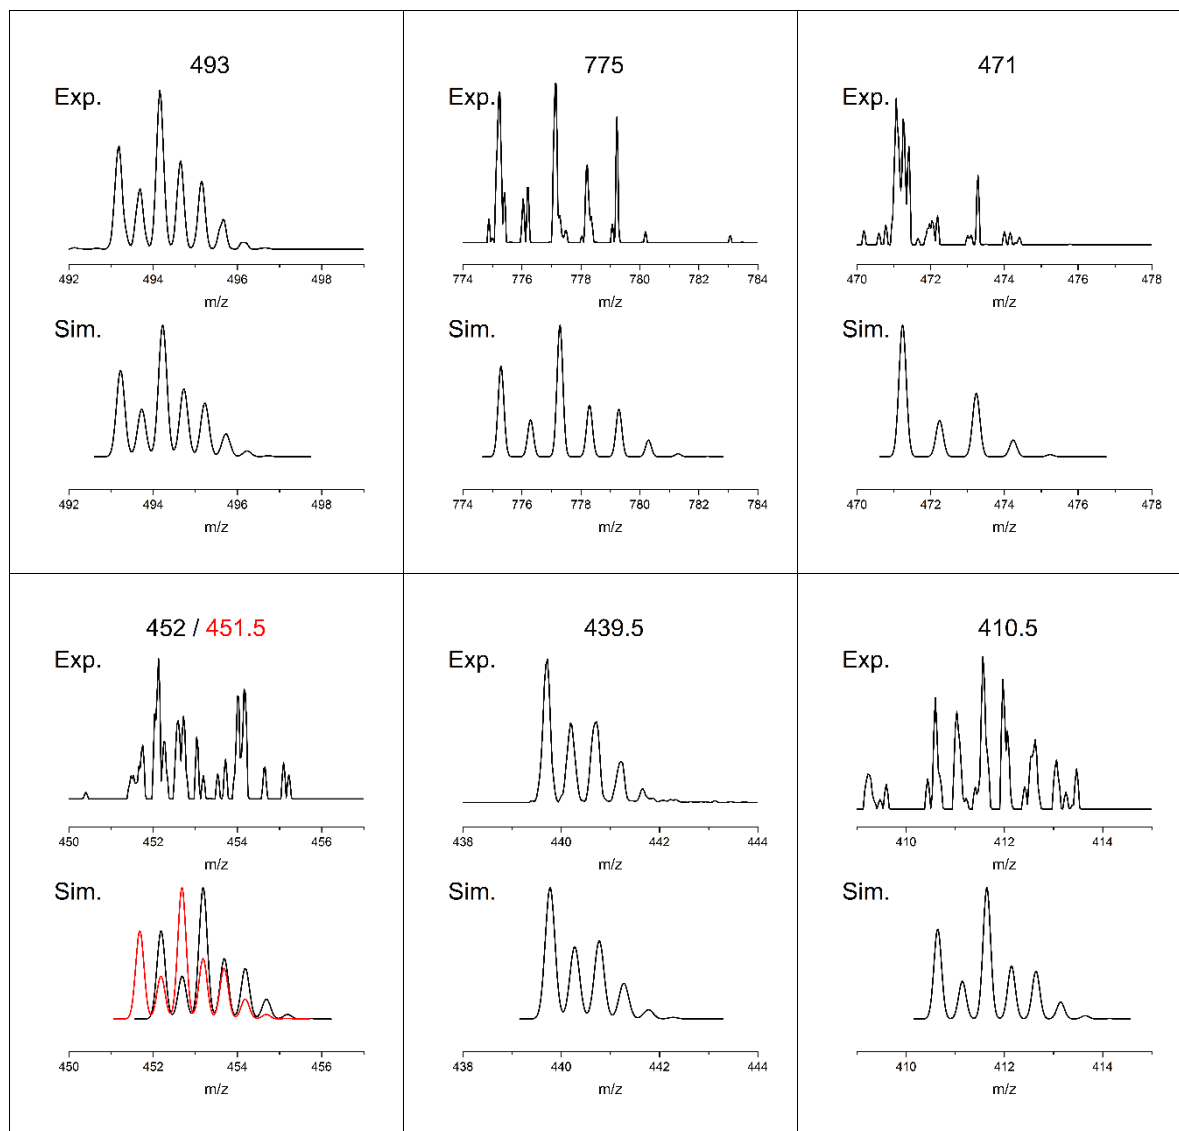

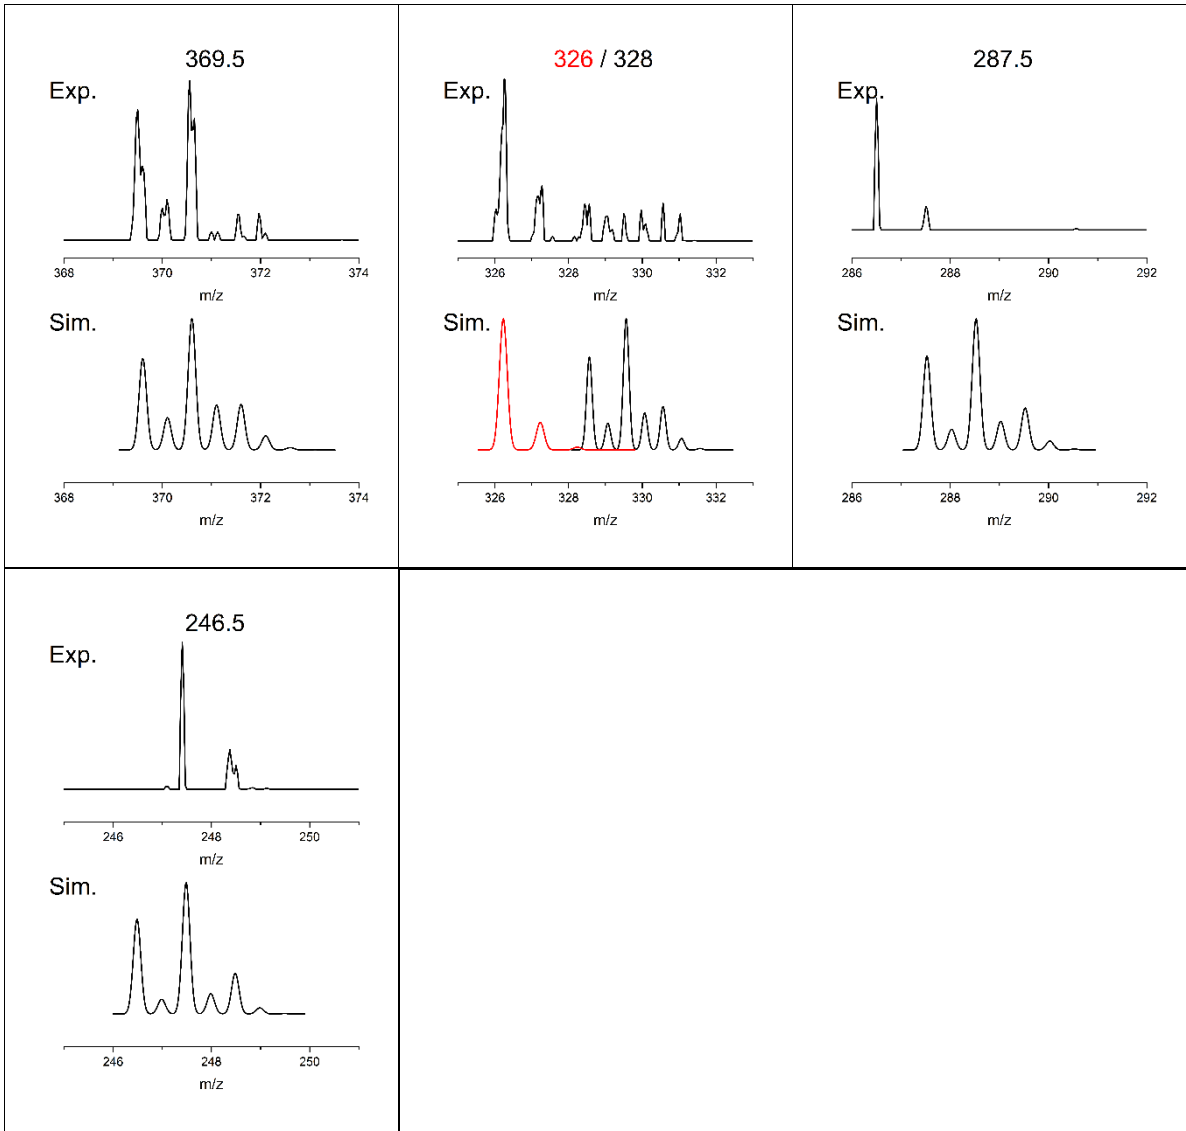

**Tab. S18** Top: Isotope patterns of isolated  $[\text{CuAu}(\text{dcpm})_2]^{2+}$  precursor ion mass-signals and its photofragment products ( $\lambda_{\text{ex}} = 285 \text{ nm}$ ,  $E = 2 \mu\text{J}$ ,  $\sim 118$  pulses), recorded with nanosecond laser system. Bottom: Simulated isotope patterns (Gaussian profile,  $m/z = 0.2 \text{ fwhm}$ ). Mass-signals normalized to unity for comparison.

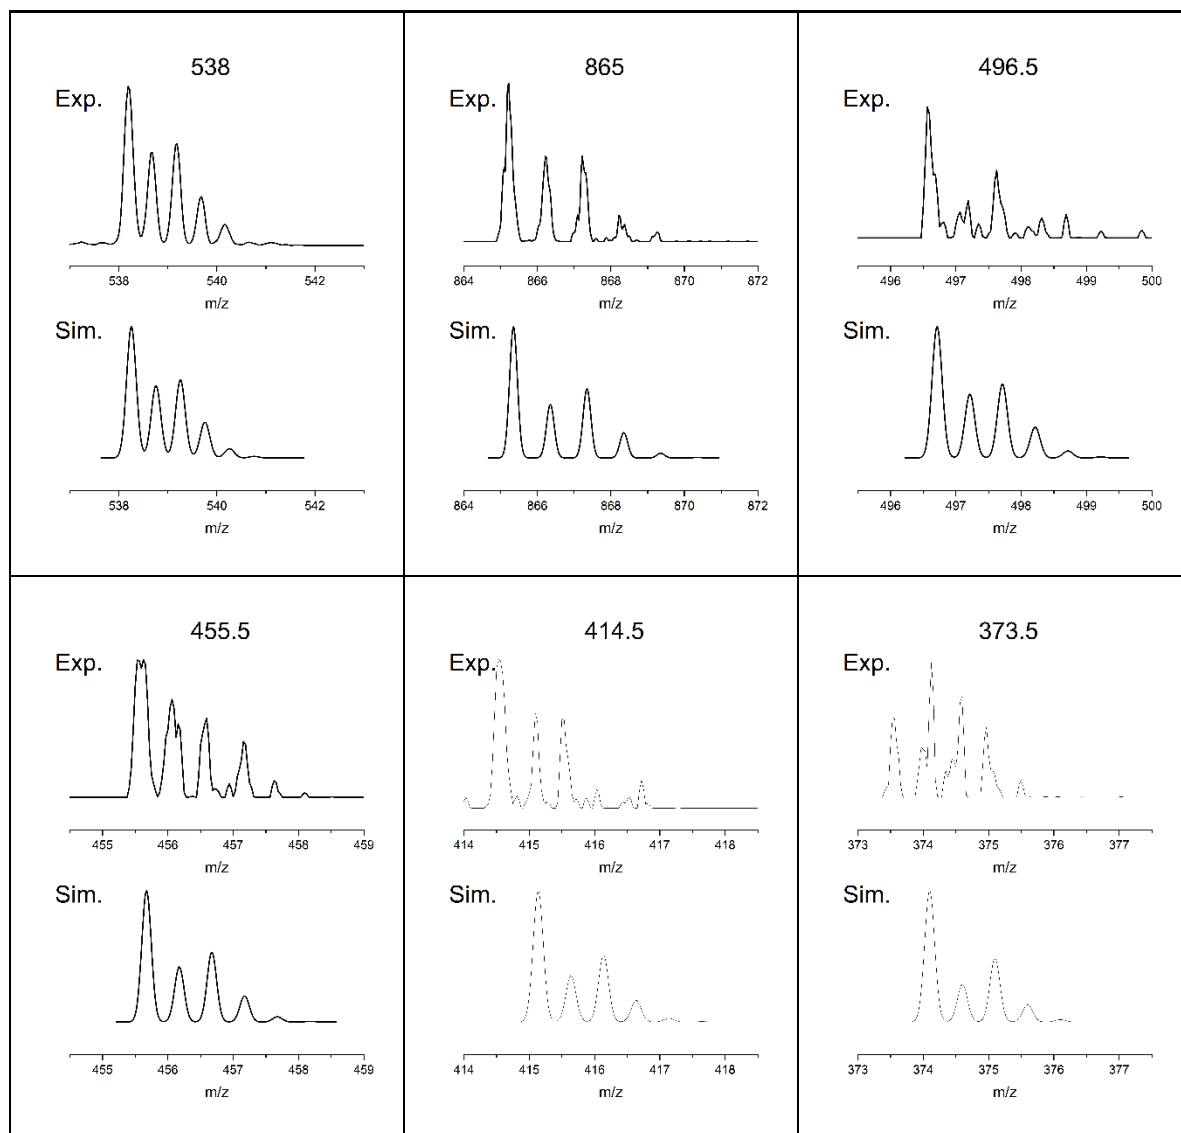

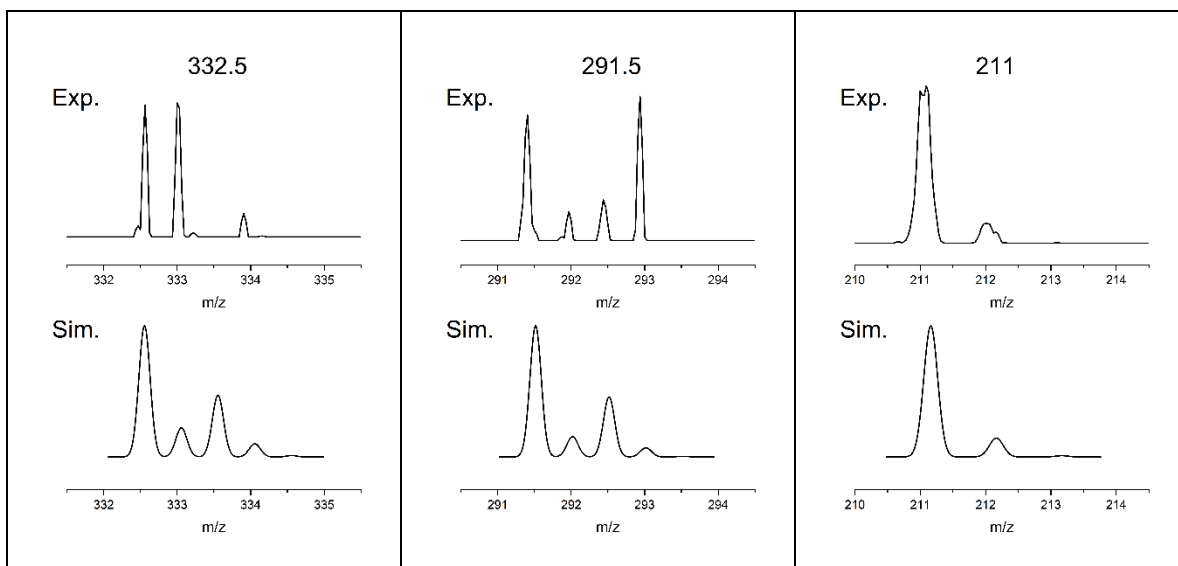

**Tab. S19** Top: Isotope patterns of isolated  $[Ag_2(dcpm)_2]^{2+}$  precursor ion mass-signals and its photofragment products ( $\lambda_{ex} = 258$  nm,  $E = 2$   $\mu$ J,  $\sim 118$  pulses), recorded with nanosecond laser system. Bottom: Simulated isotope patterns (Gaussian profile,  $m/z = 0.2$  fwhm). Mass-signals normalized to unity for comparison.

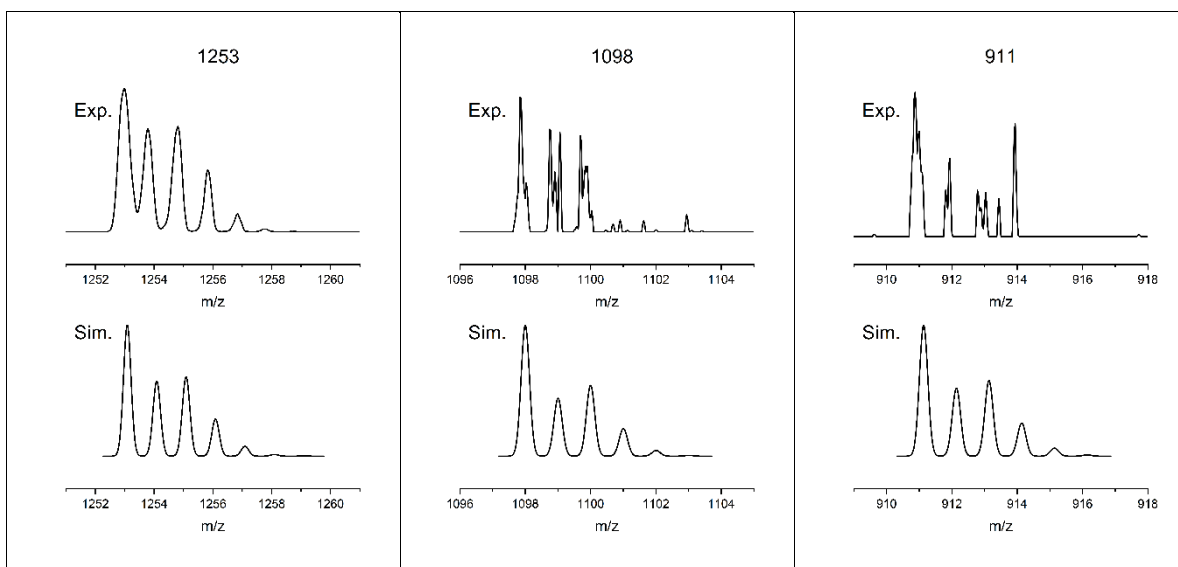

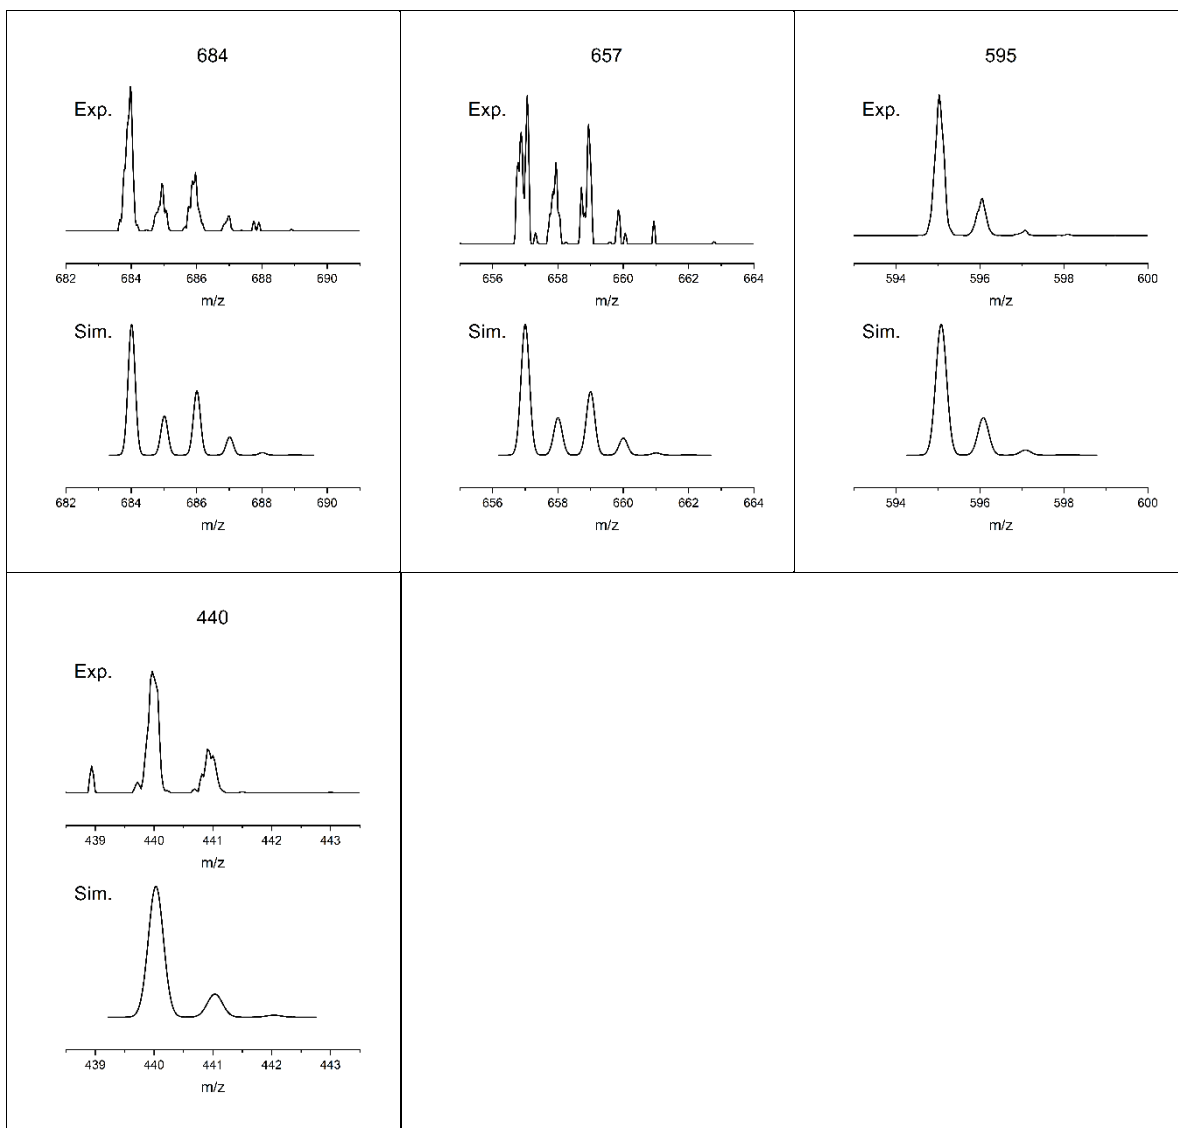

**Tab. S20** Top: Isotope patterns of isolated  $[AgAu(dcpm)_2]^{2+}$  precursor ion mass-signals and its photofragment products ( $\lambda_{ex} = 267$  nm,  $E = 2 \mu J$ ,  $\sim 118$  pulses) , recorded with nanosecond laser system. Bottom: Simulated isotope patterns (Gaussian profile,  $m/z = 0.2$  fwhm). Mass-signals normalized to unity for comparison.

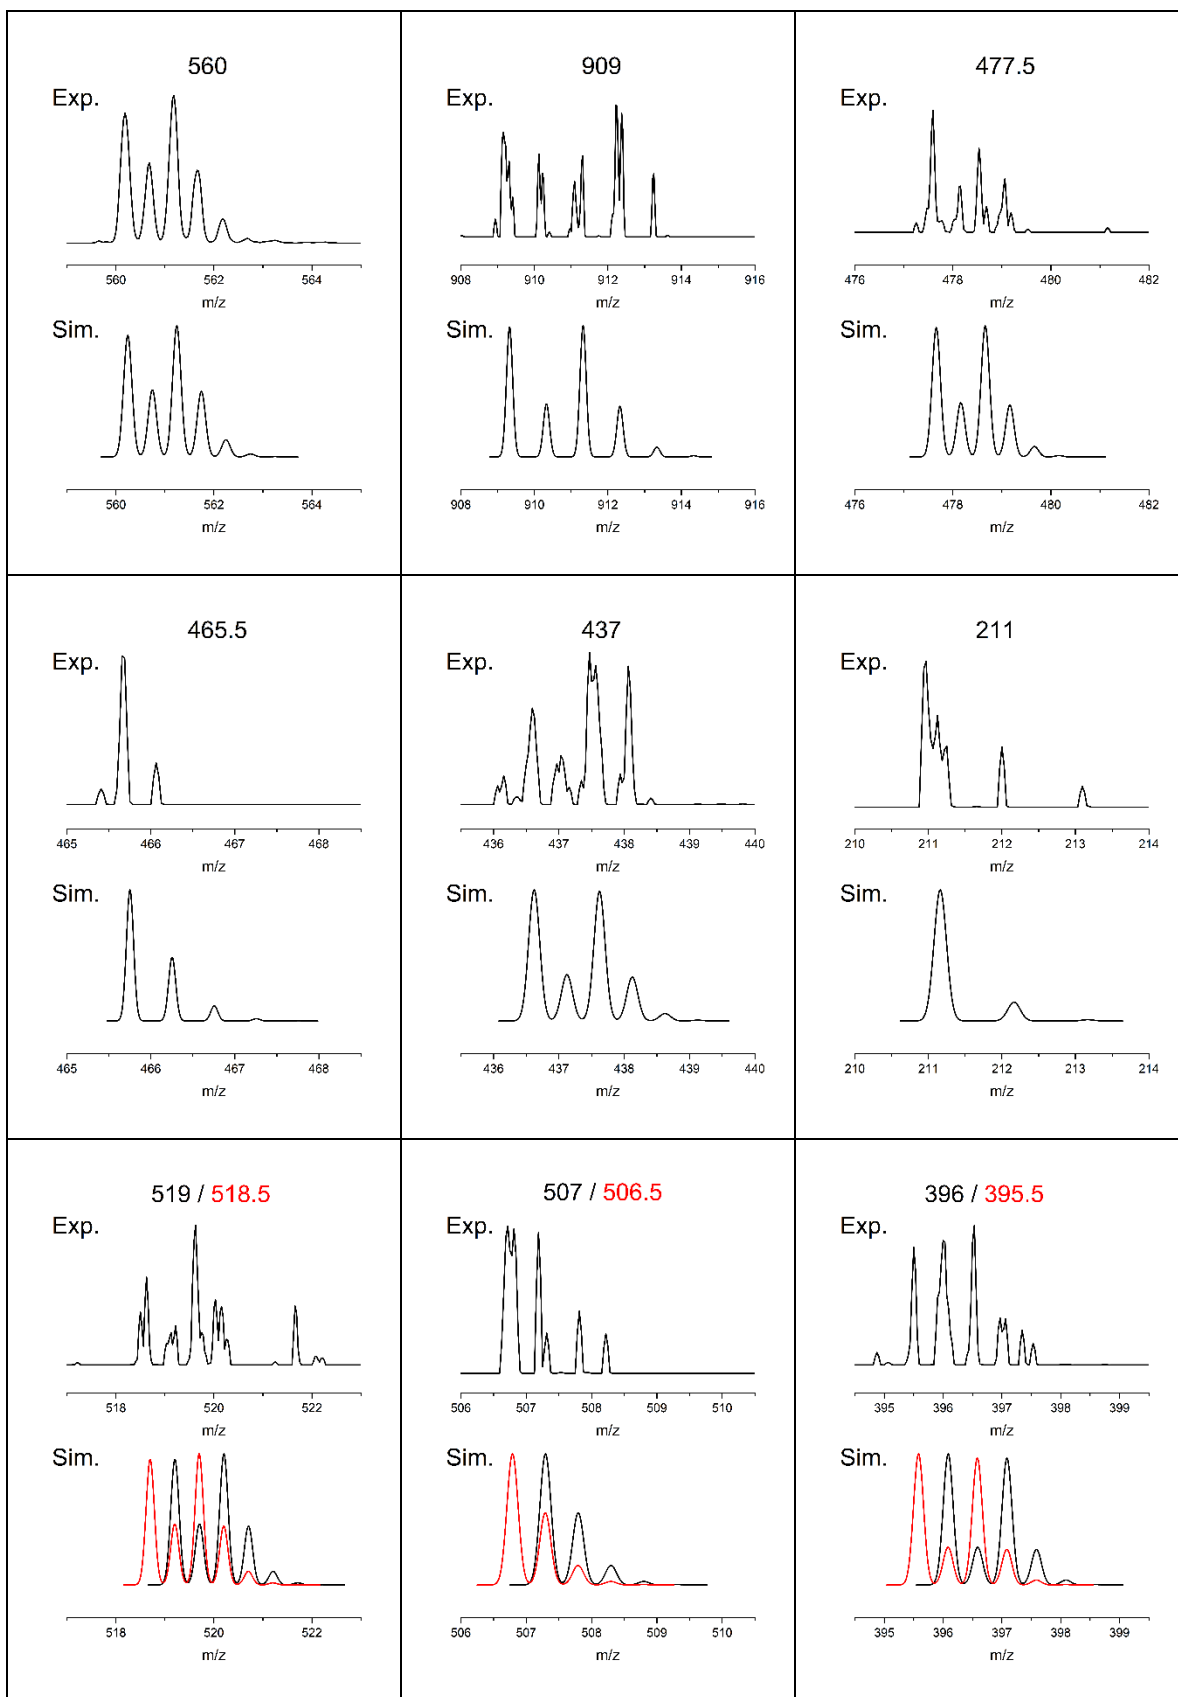

**Tab. S21** Top: Isotope patterns of isolated  $[\text{Au}_2(\text{dcpm})_2]^{2+}$  precursor ion mass-signals and its photofragment products ( $\lambda_{\text{ex}} = 276 \text{ nm}$ ,  $E = 2 \mu\text{J}$ ,  $\sim 118$  pulses), recorded with nanosecond laser system. Bottom: Simulated isotope patterns (Gaussian profile,  $m/z = 0.2$  fwhm). Mass-signals normalized to unity for comparison.

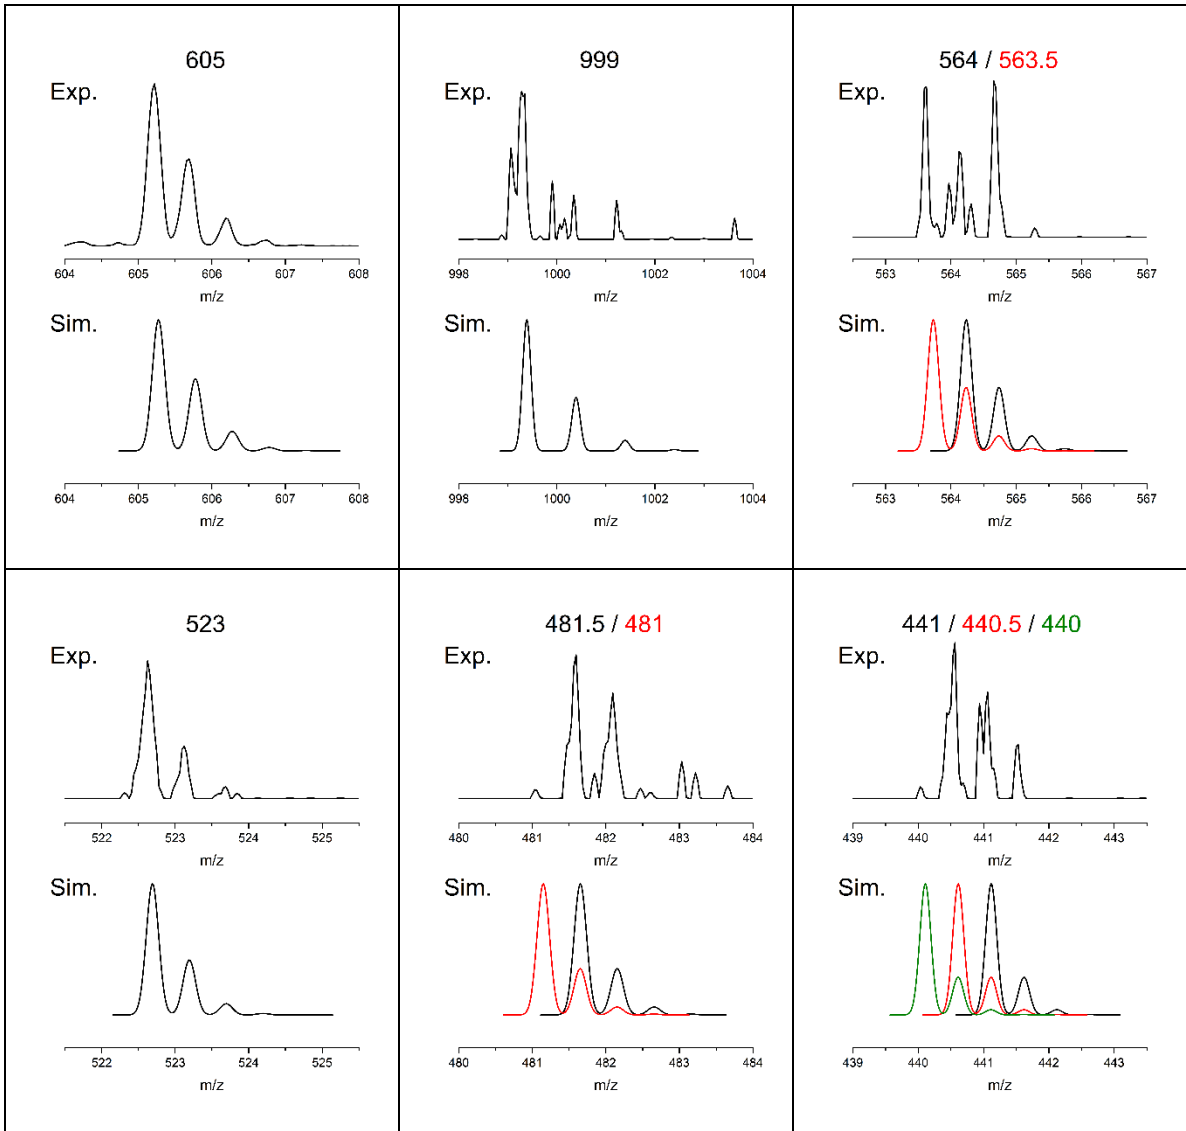



## 2. Fragment channel specific UV PD spectra

### 2.1 Femtosecond Laser System

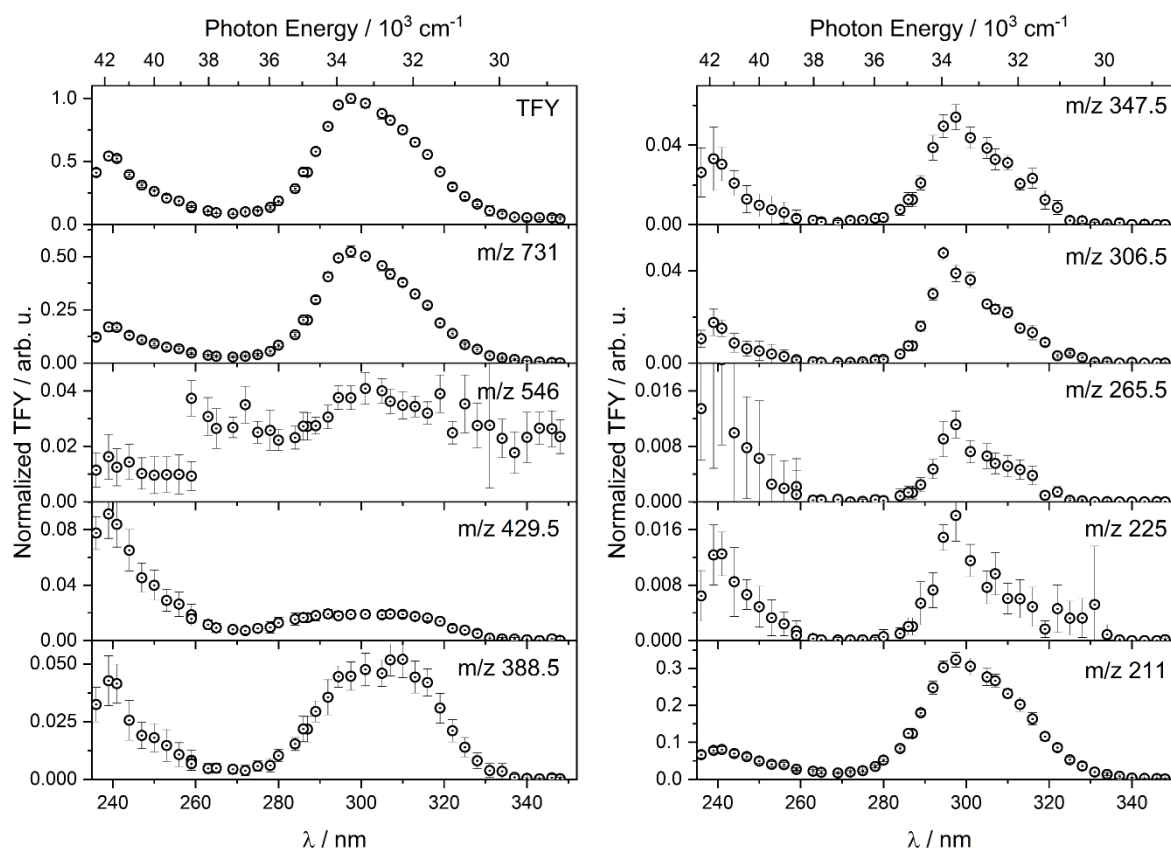

**Fig. S8** Channel-specific UV PD spectra ( $E_{\text{pulse}} = 2\mu\text{J}$ ) of isolated  $[\text{Cu}_2(\text{dcpm})_2]^{2+}$ . Spectra were normalized to the maximum of the TFY. Integer nominal masses of the individual PD product channels are indicated, and error bars represent one standard deviation ( $\pm 1\sigma$ ).

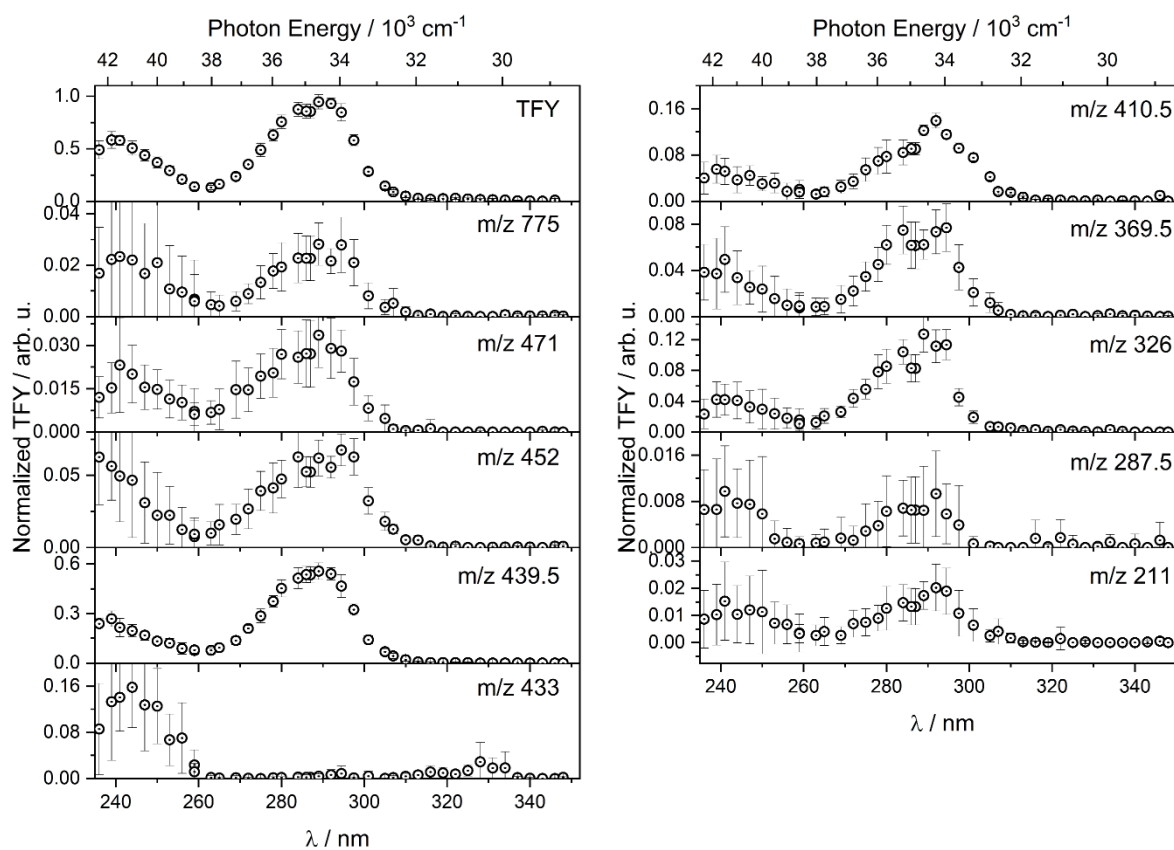

**Fig. S9** Channel-specific UV PD spectra ( $E_{\text{pulse}} = 2\mu\text{J}$ ) of isolated  $[\text{CuAg}(\text{dcpm})_2]^{2+}$ . Spectra were normalized to the maximum of the TFY. Integer nominal masses of the individual PD product channels are indicated, and error bars represent one standard deviation ( $\pm 1\sigma$ ).

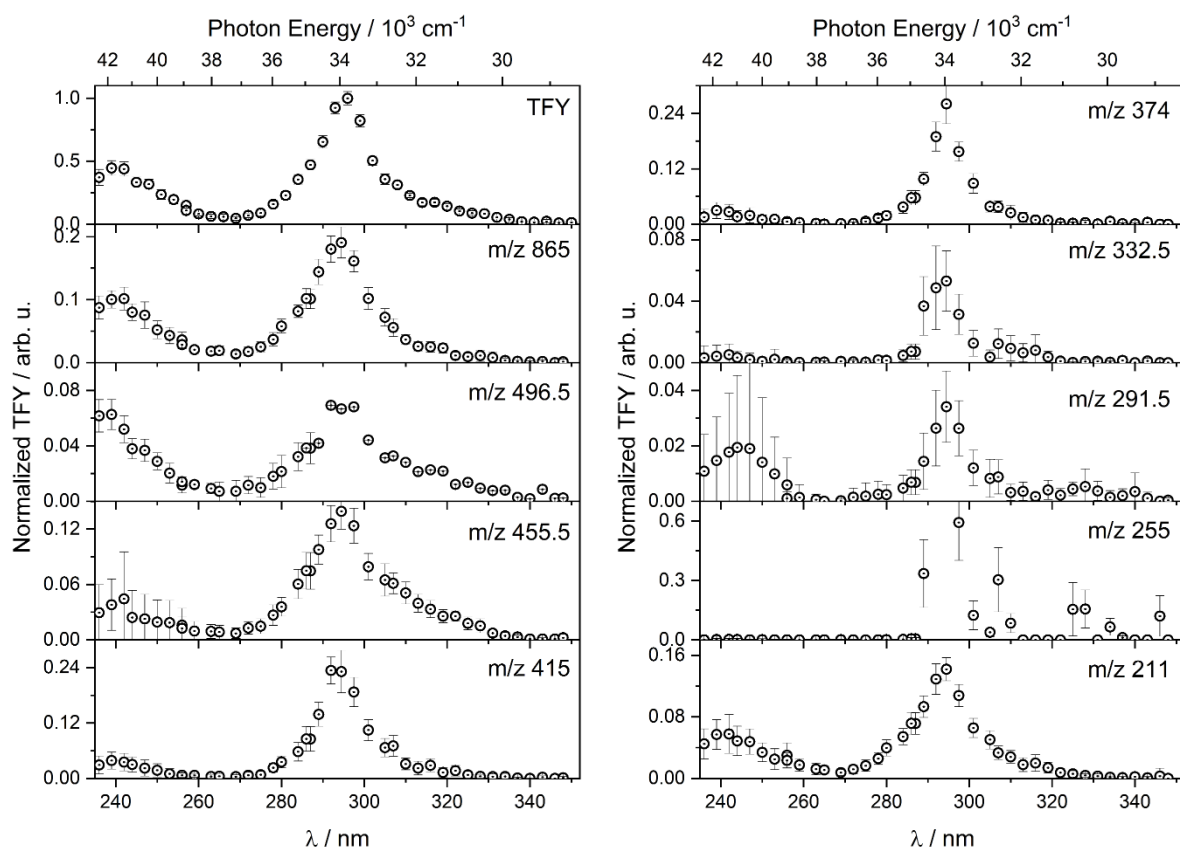

**Fig. S10** Channel-specific UV PD spectra ( $E_{\text{pulse}} = 2\mu\text{J}$ ) of isolated  $[\text{CuAu}(\text{dcpm})_2]^{2+}$ . Spectra were normalized to the maximum of the TFY. Integer nominal masses of the individual PD product channels are indicated, and error bars represent one standard deviation ( $\pm 1\sigma$ ).

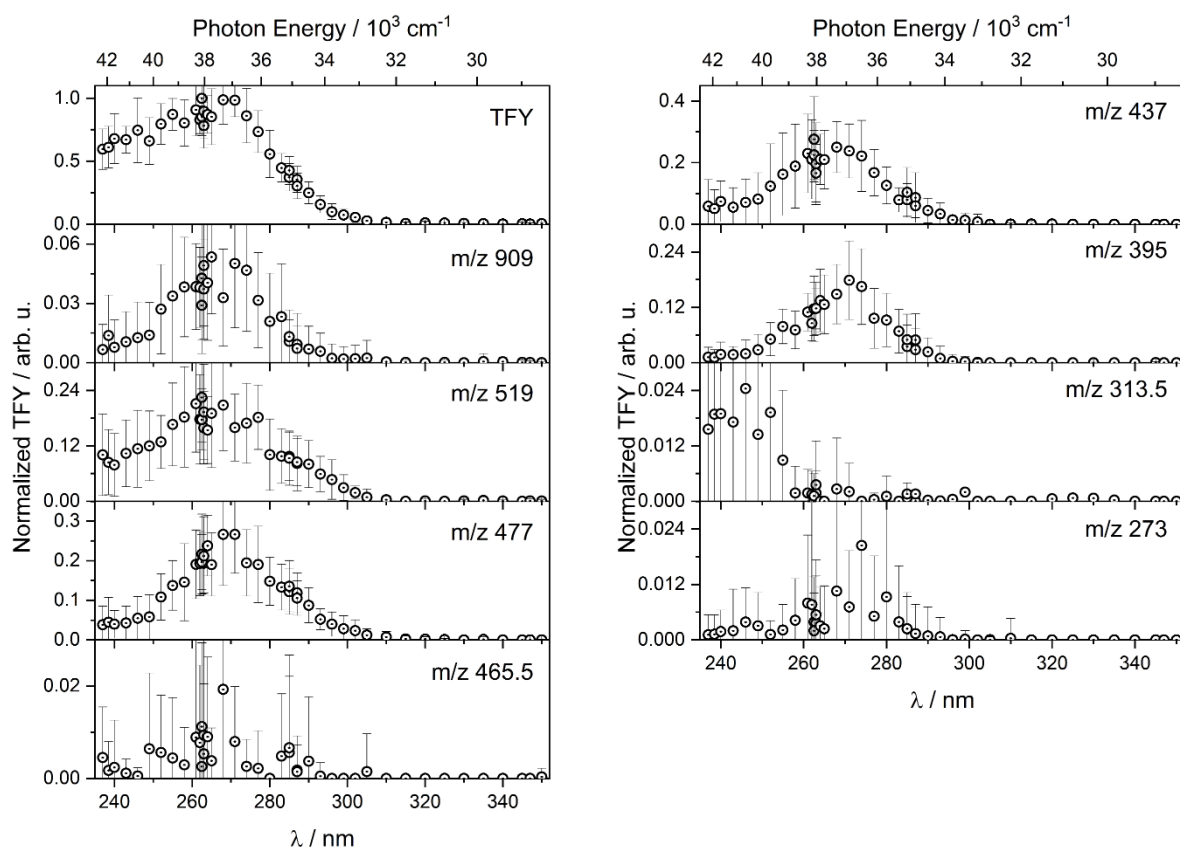

**Fig. S11** Channel-specific UV PD spectra ( $E_{\text{pulse}} = 2\mu\text{J}$ ) of isolated  $[\text{AgAu}(\text{dcpm})_2]^{2+}$ . Spectra were normalized to the maximum of the TFY. Integer nominal masses of the individual PD product channels are indicated, and error bars represent one standard deviation ( $\pm 1\sigma$ ).

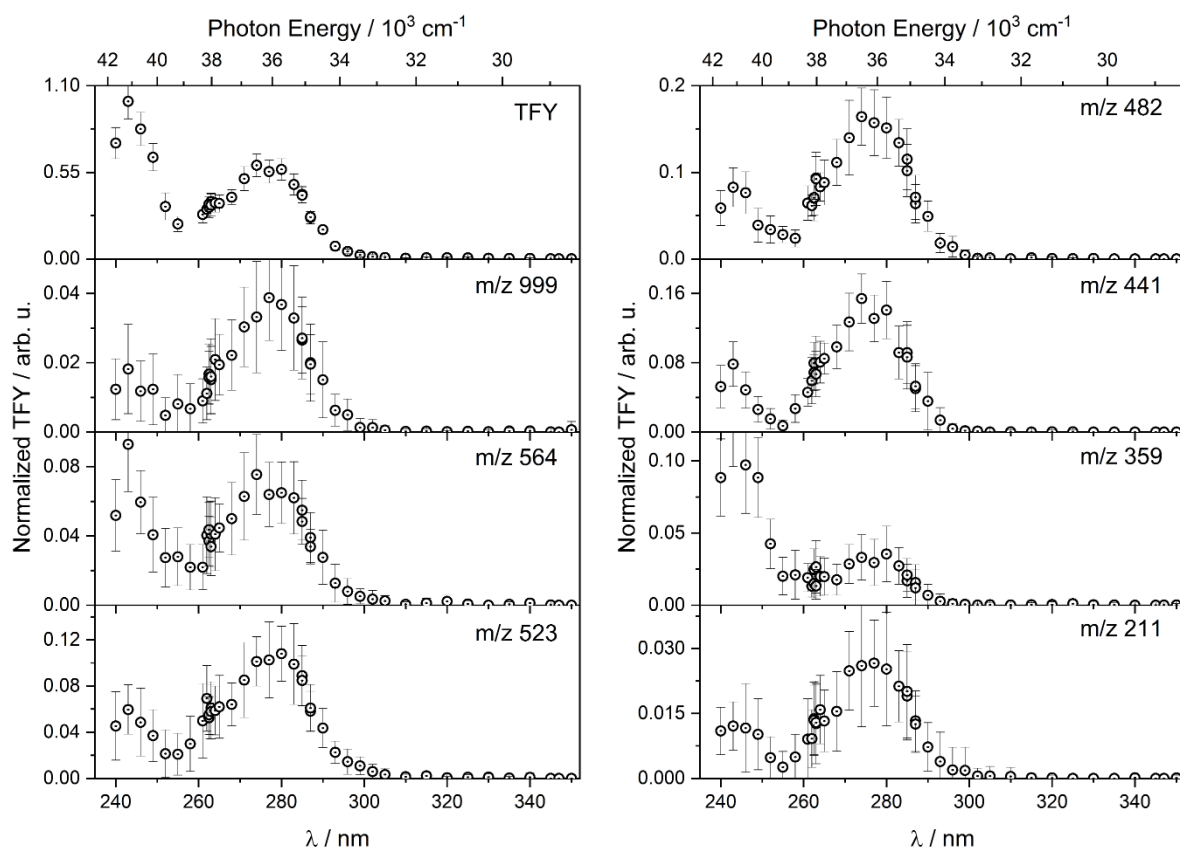

**Fig. S12** Channel-specific UV PD spectra ( $E_{\text{pulse}} = 2\mu\text{J}$ ) of isolated  $[\text{Au}_2(\text{dcpm})_2]^{2+}$ . Spectra were normalized to the maximum of the TFY. Integer nominal masses of the individual PD product channels are indicated, and error bars represent one standard deviation ( $\pm 1\sigma$ ).

## 2.2 Nanosecond laser system

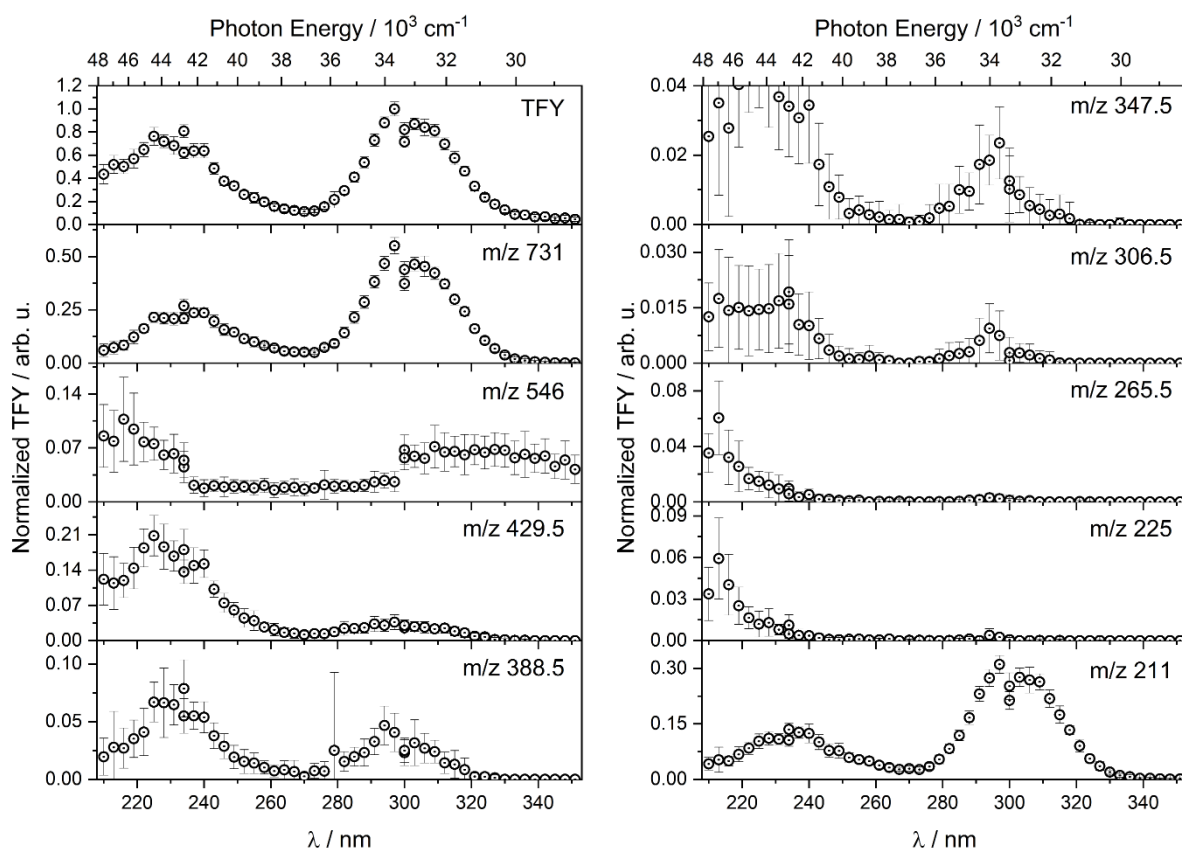

**Fig. S13** Channel-specific UV PD spectra ( $E_{\text{pulse}} = 2\mu\text{J}$ ) of isolated  $[\text{Cu}_2(\text{dcpm})_2]^{2+}$ . Spectra were normalized to the maximum of the TFY. Integer nominal masses of the individual PD product channels are indicated, and error bars represent one standard deviation ( $\pm 1\sigma$ ).

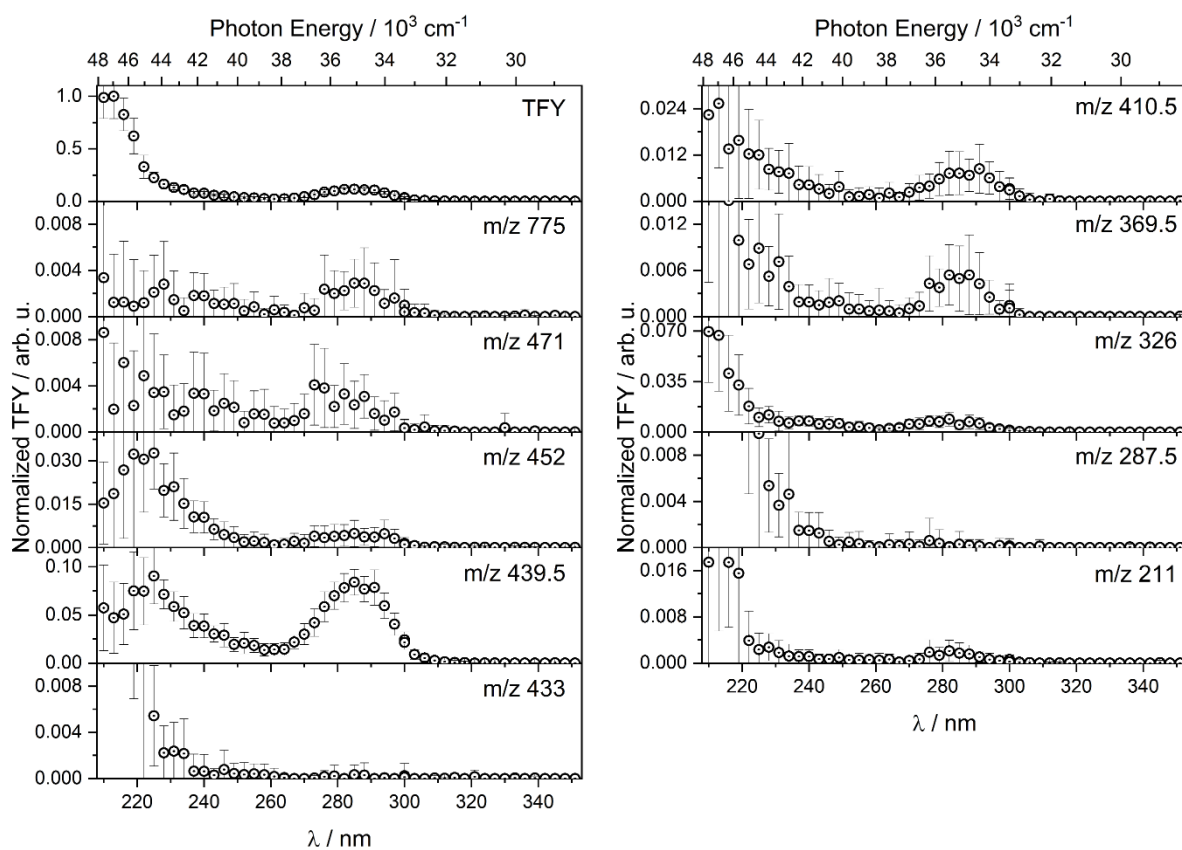

**Fig. S14** Channel-specific UV PD spectra ( $E_{\text{pulse}} = 2\mu\text{J}$ ) of isolated  $[\text{CuAg}(\text{dcpm})_2]^{2+}$ . Spectra were normalized to the maximum of the TFY. Integer nominal masses of the individual PD product channels are indicated, and error bars represent one standard deviation ( $\pm 1\sigma$ ).

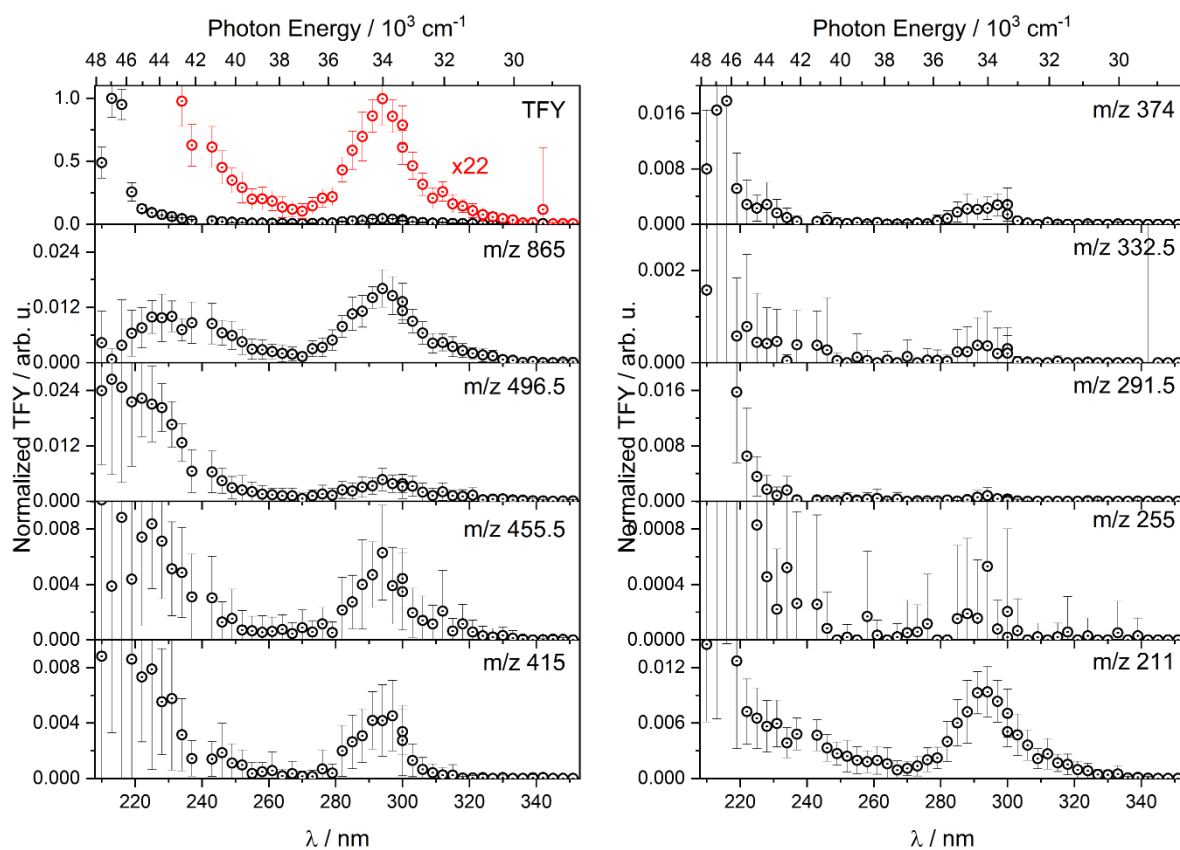

**Fig. S15** Channel-specific UV PD spectra ( $E_{\text{pulse}} = 2\mu\text{J}$ ) of isolated  $[\text{CuAu}(\text{dcpm})_2]^{2+}$ . Spectra were normalized to the maximum of the TFY. Integer nominal masses of the individual PD product channels are indicated, and error bars represent one standard deviation ( $\pm 1\sigma$ ).



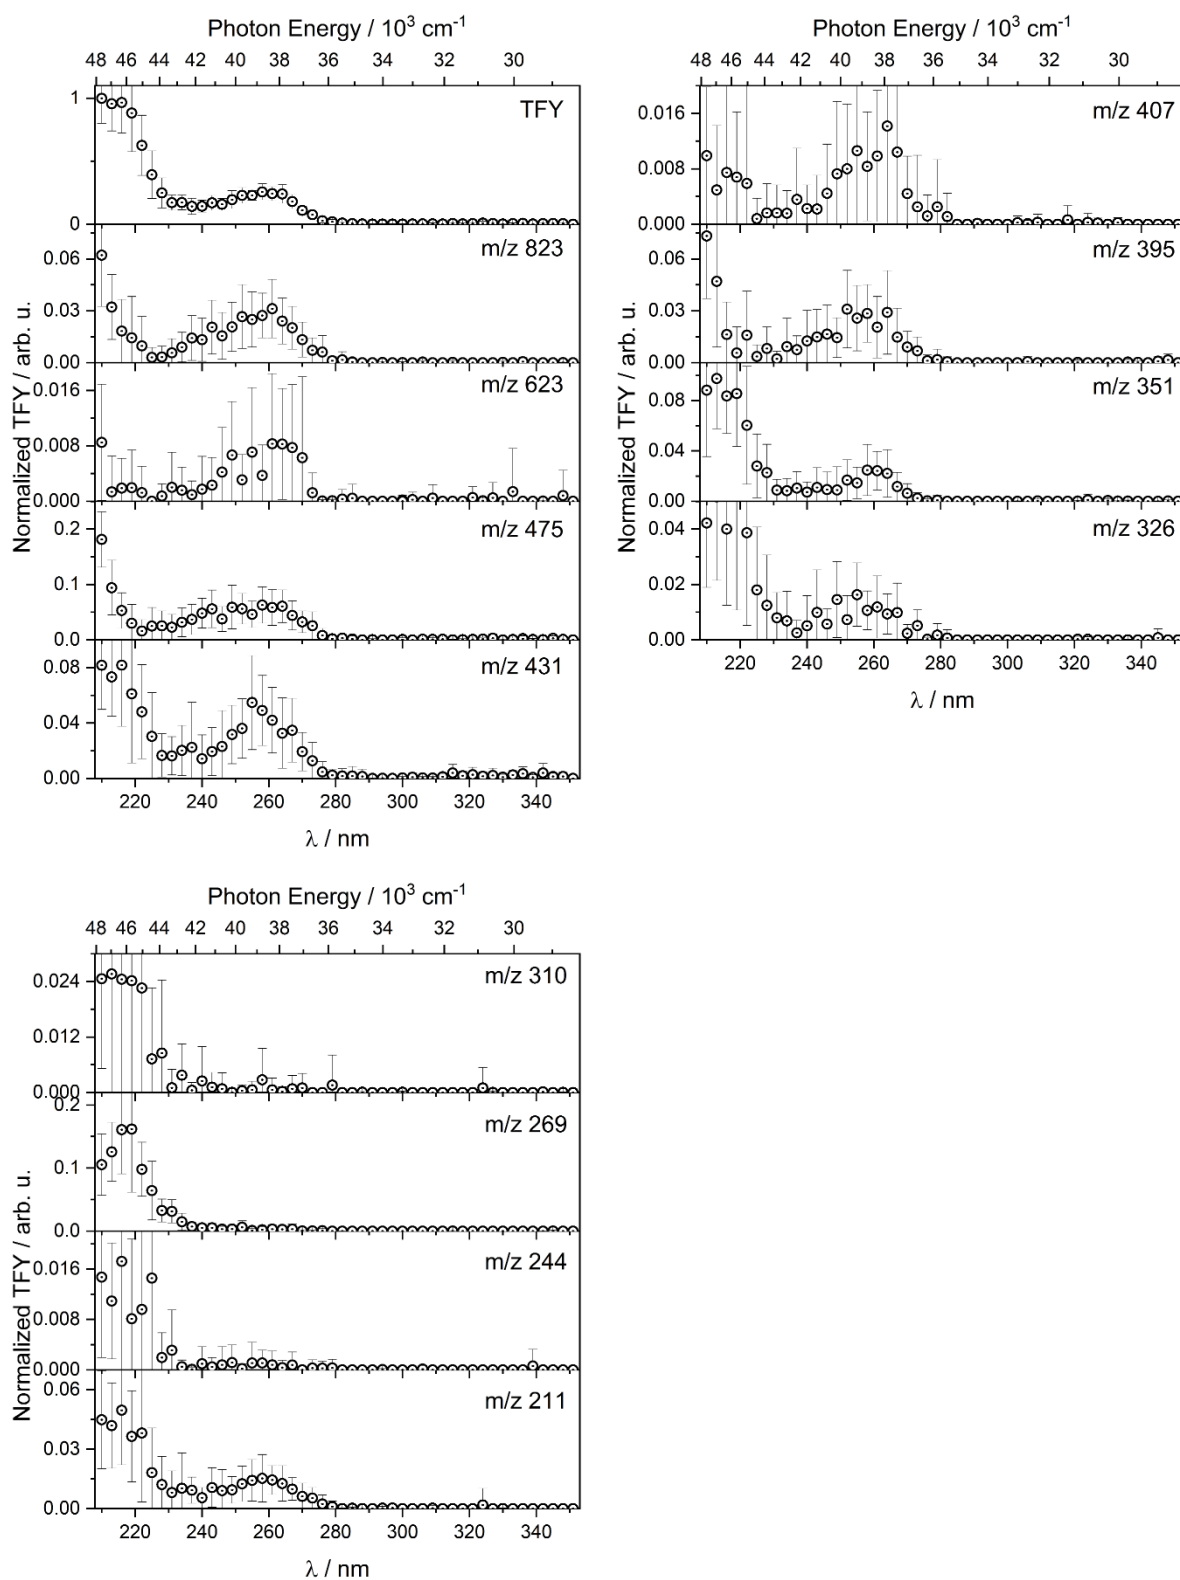

**Fig. S16** Channel-specific UV PD spectra ( $E_{\text{pulse}} = 2\mu\text{J}$ ) of isolated  $[\text{Ag}_2(\text{dcpm})_2]^{2+}$ . Spectra were normalized to the maximum of the TFY. Integer nominal masses of the individual PD product channels are indicated, and error bars represent one standard deviation ( $\pm 1\sigma$ ).

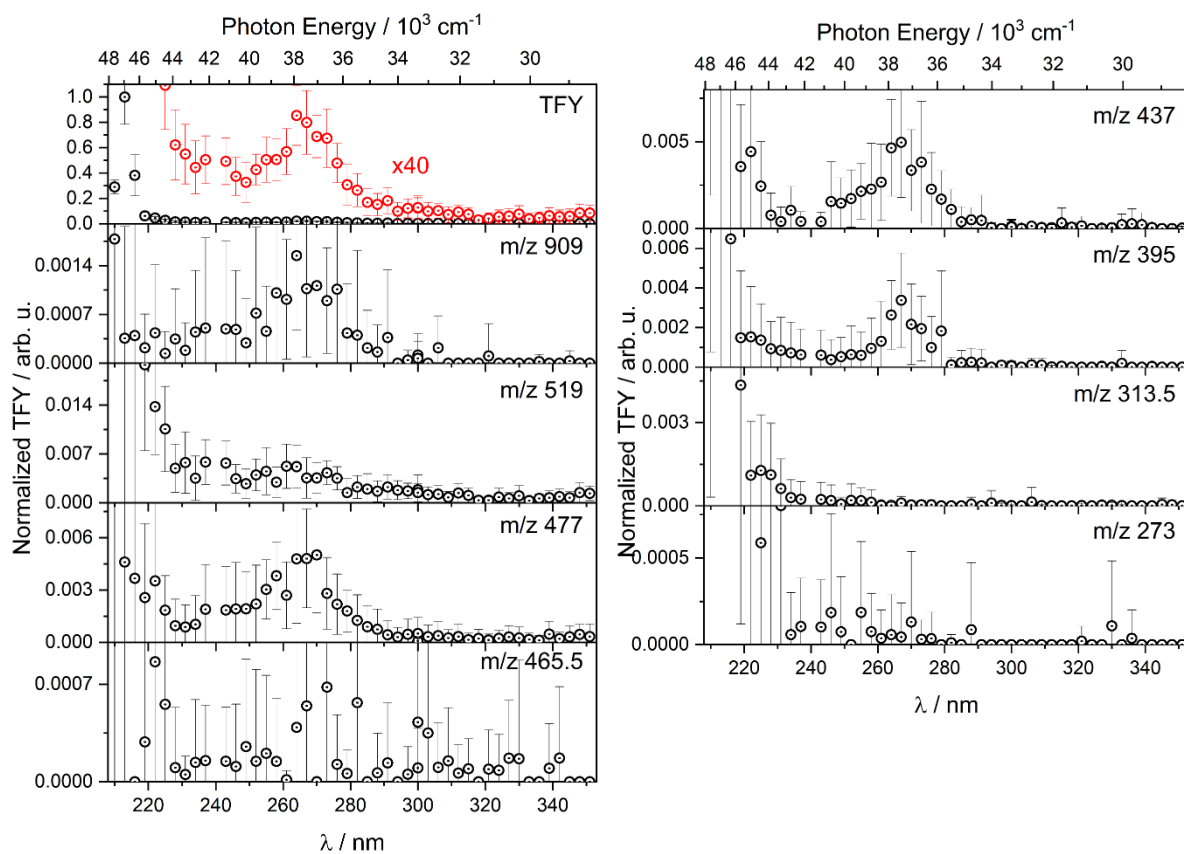

**Fig. S17** Channel-specific UV PD spectra ( $E_{\text{pulse}} = 2\mu\text{J}$ ) of isolated  $[\text{AgAu}(\text{dcpm})_2]^{2+}$ . Spectra were normalized to the maximum of the TFY. Integer nominal masses of the individual PD product channels are indicated, and error bars represent one standard deviation ( $\pm 1\sigma$ ).

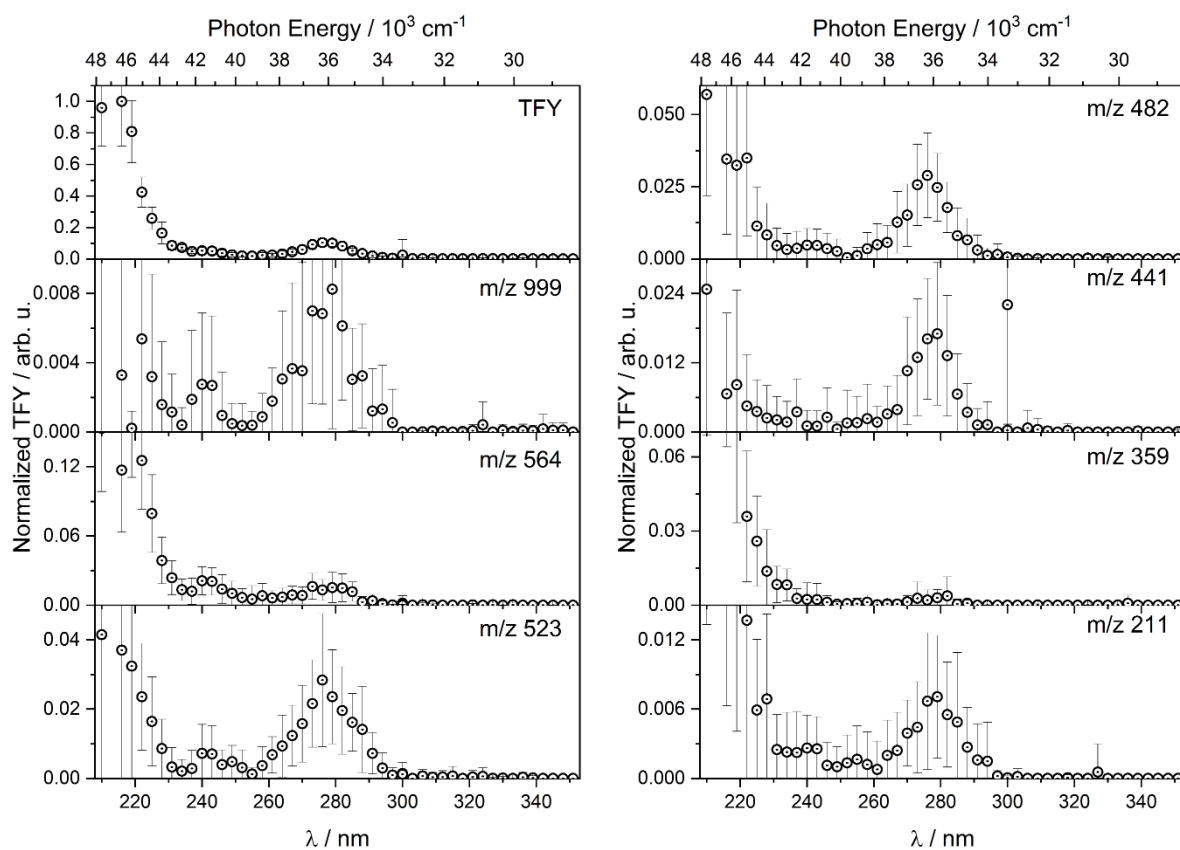

**Fig. S18** Channel-specific UV PD spectra ( $E_{\text{pulse}} = 2\mu\text{J}$ ) of isolated  $[\text{Au}_2(\text{dcpm})_2]^{2+}$ . Spectra were normalized to the maximum of the TFY. Integer nominal masses of the individual PD product channels are indicated, and error bars represent one standard deviation ( $\pm 1\sigma$ ).

### 3. Dependence of total fragment yield on laser pulse energy

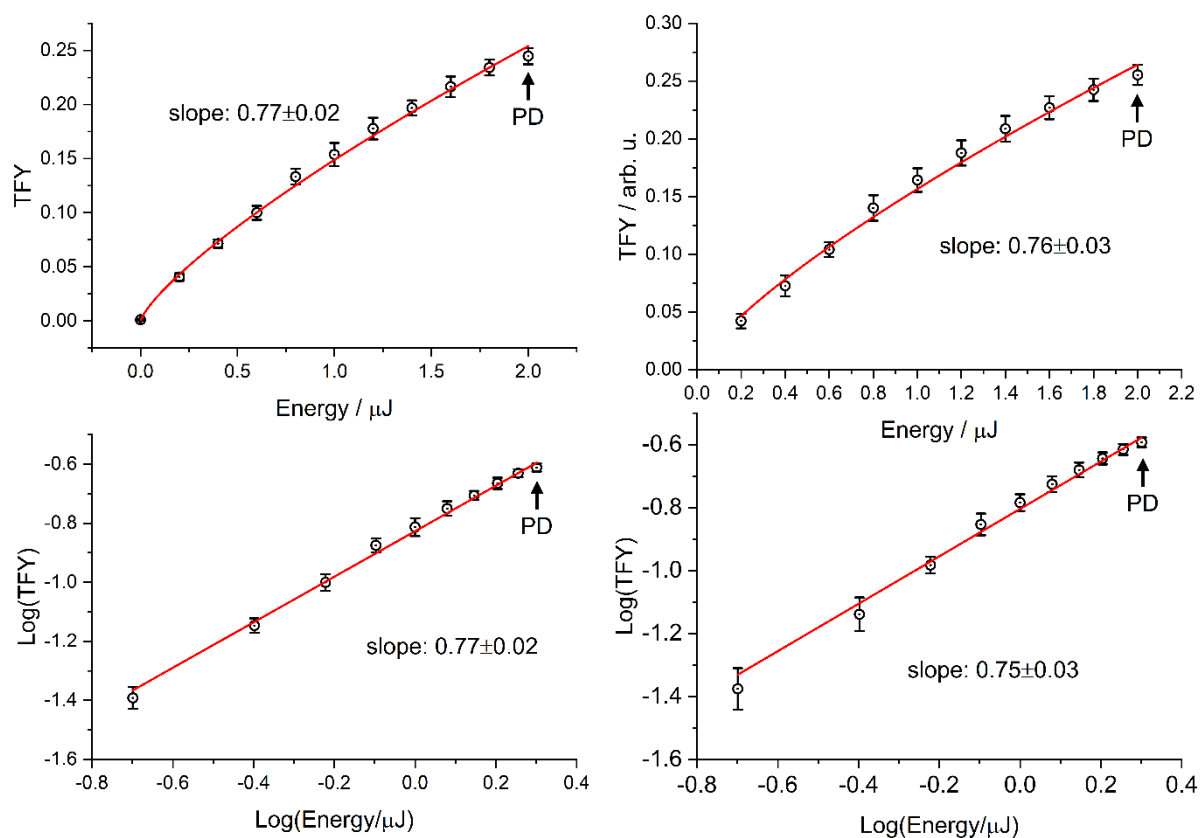

**Fig. S19** Pulse energy dependence of the total fragment yield of isolated  $[\text{Cu}_2(\text{dcpm})_2]^{2+}$  ions ( $\lambda_{\text{ex}} = 297 \text{ nm}$ , 118 pulses). Dependencies determined according to a)  $Y = A \cdot E^n$  and b)  $Y = A \cdot E$ . Linear fits in panel below indicate a single-photon absorption process for photofragmentation. Arrows indicate  $E_{\text{pulse}} = 2 \mu\text{J}$  for UV PD spectra. Femtosecond (left) and nanosecond data (right) are displayed.

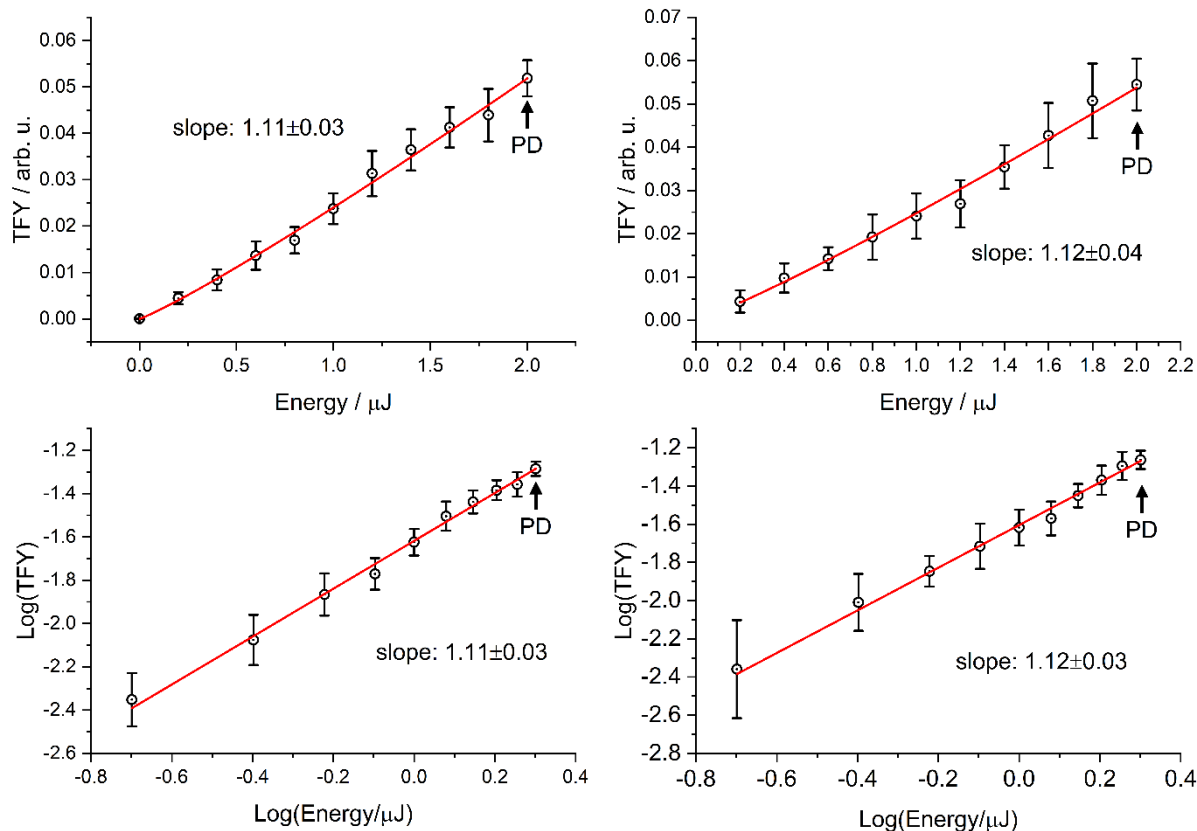

**Fig. S20** Pulse energy dependence of the total fragment yield of isolated  $[\text{CuAg}(\text{dcpm})_2]^{2+}$  ions ( $\lambda_{\text{ex}} = 294 \text{ nm}$ , 118 pulses). Dependencies determined according to a)  $Y = A \cdot E^n$  and b)  $Y = A \cdot E$ . Linear fits in panel below indicate a single-photon absorption process for photofragmentation. Arrows indicate  $E_{\text{pulse}} = 2 \mu\text{J}$  for UV PD spectra. Femtosecond (left) and nanosecond data (right) are displayed.

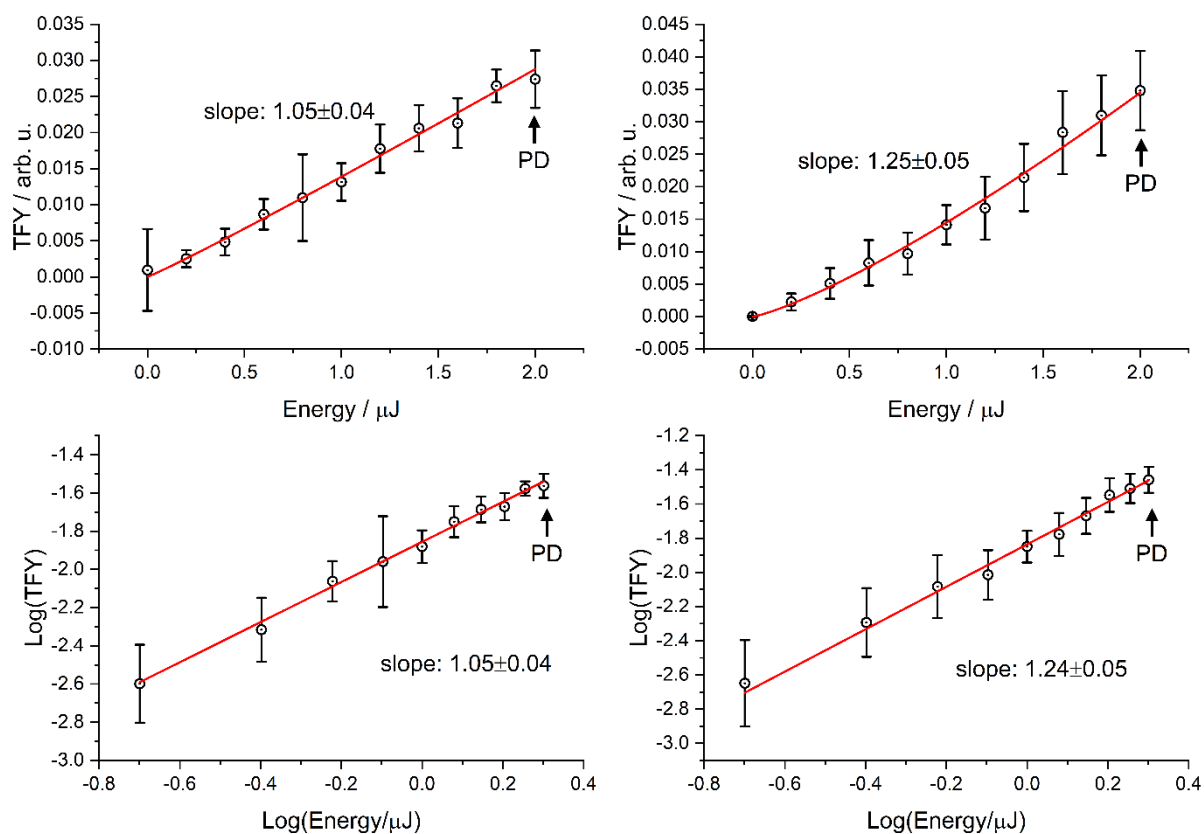

**Fig. S21** Pulse energy dependence of the total fragment yield of isolated  $[\text{CuAu}(\text{dcpm})_2]^{2+}$  ions ( $\lambda_{\text{ex}} = 289 \text{ nm}$ , 118 pulses). Dependencies determined according to a)  $Y = A \cdot E^n$  and b)  $Y = A \cdot E$ . Linear fits in panel below indicate a single-photon absorption process for photofragmentation. Arrows indicate  $E_{\text{pulse}} = 2 \mu\text{J}$  for UV PD spectra. Femtosecond (left) and nanosecond data (right) are displayed.

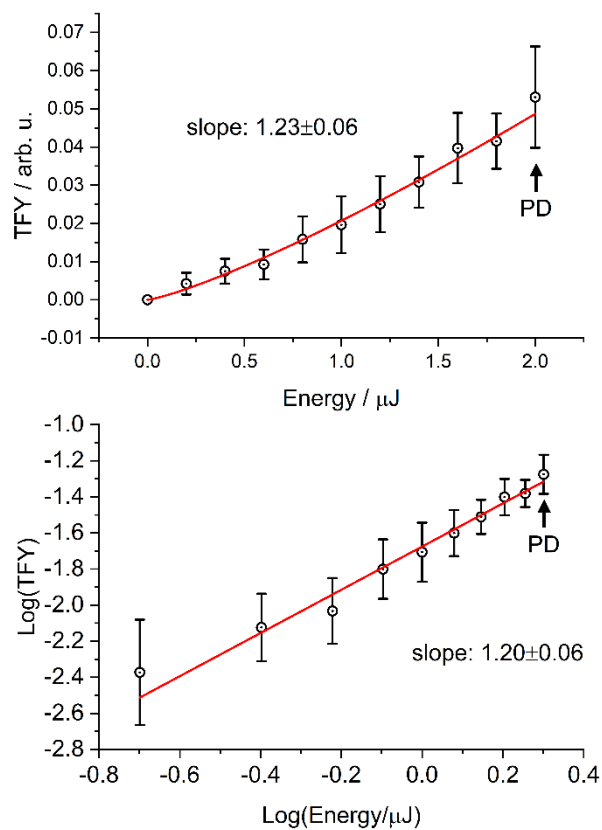

**Fig. S22** Pulse energy dependence of the total fragment yield of isolated  $[\text{Ag}_2(\text{dcpm})_2]^{2+}$  ions ( $\lambda_{\text{ex}} = 258 \text{ nm}$ , 118 pulses). Dependencies determined according to a)  $Y = A \cdot E^n$  and b)  $Y = A \cdot E$ . Linear fits in panel below indicate a single-photon absorption process for photofragmentation. Arrows indicate  $E_{\text{pulse}} = 2 \mu\text{J}$  for UV PD spectra. Nanosecond data are displayed.

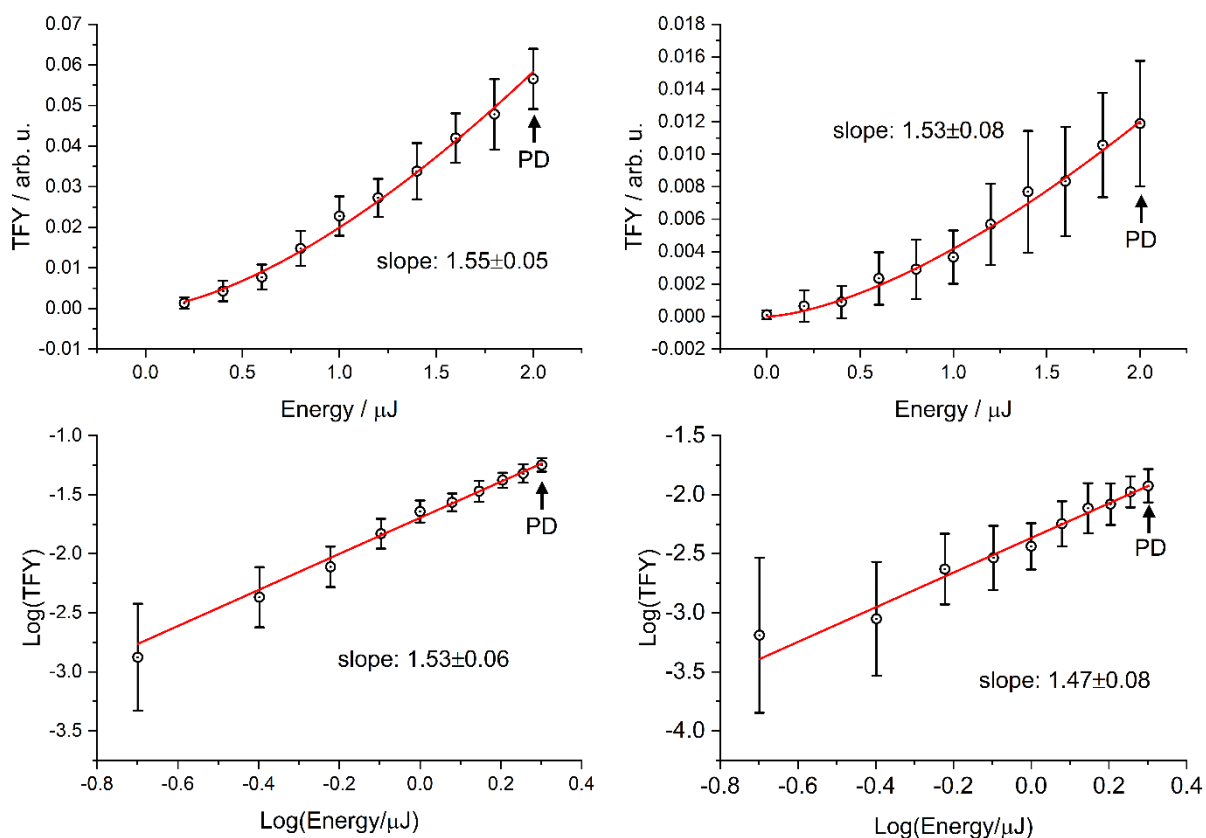

**Fig. S23** Pulse energy dependence of the total fragment yield of isolated  $[\text{AgAu}(\text{dcpm})_2]^{2+}$  ions ( $\lambda_{\text{ex}} = 268 \text{ nm}$ , 118 pulses). Dependencies determined according to a)  $Y = A \cdot E^n$  and b)  $Y = A \cdot E$ . Linear fits in panel below indicate a single-photon absorption process for photofragmentation. Arrows indicate  $E_{\text{pulse}} = 2 \mu\text{J}$  for UV PD spectra. Femtosecond (left) and nanosecond data (right) are displayed.



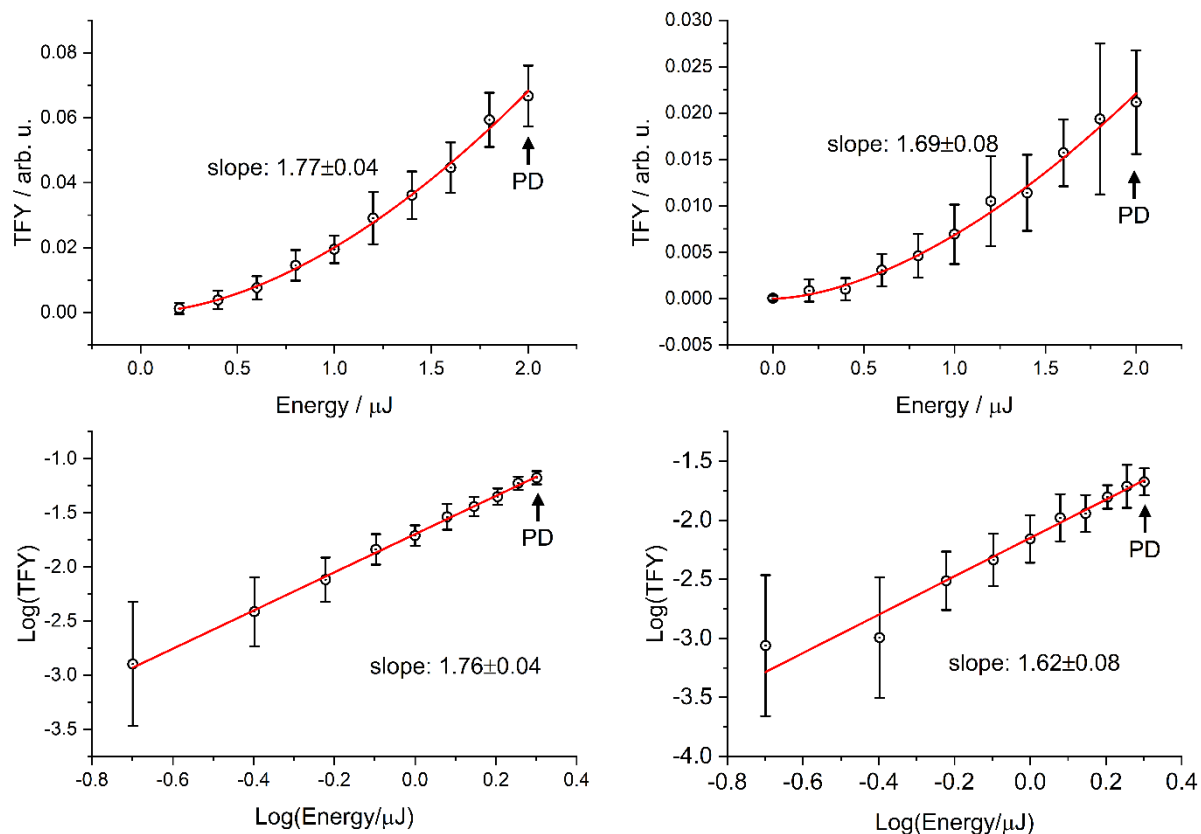

**Fig. S24** Pulse energy dependence of the total fragment yield of isolated  $[\text{Au}_2(\text{dcpm})_2]^{2+}$  ions ( $\lambda_{\text{ex}} = 277 \text{ nm}$ , 118 pulses). Dependencies determined according to a)  $Y = A \cdot E^n$  and b)  $Y = A \cdot E$ . Linear fits in panel below indicate a single-photon absorption process for photofragmentation. Arrows indicate  $E_{\text{pulse}} = 2 \mu\text{J}$  for UV PD spectra. Femtosecond (left) and nanosecond data (right) are displayed.

#### 4. Comparison of femto- and nanosecond data

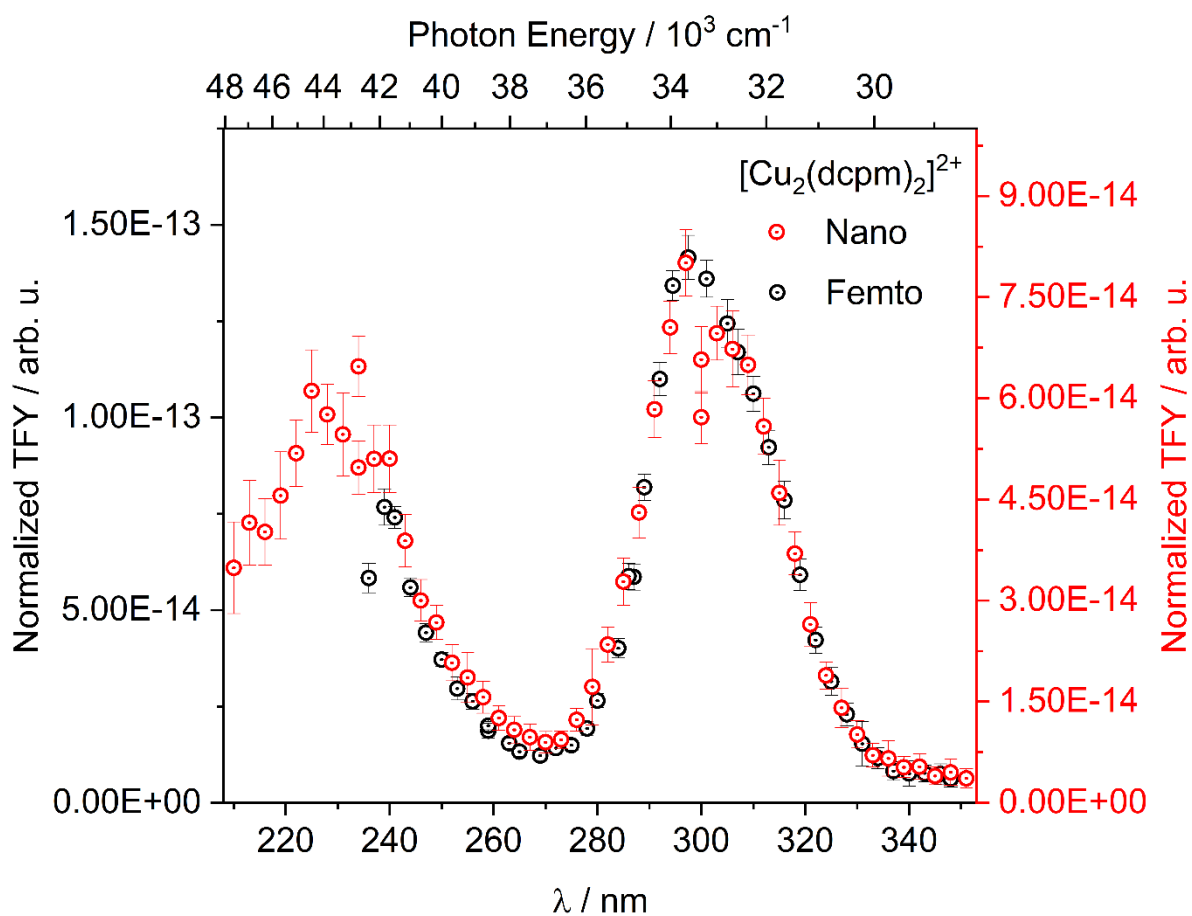

**Fig. S25** Comparison of femtosecond (black circles) and nanosecond (red circles) UV PD total yield spectra of  $[\text{Cu}_2(\text{dcpm})_2]^{2+}$  ions (2  $\mu\text{J}$ , 118 pulses). Spectra were normalized to number of photons. Error bars indicate one standard deviation ( $\pm 1\sigma$ ).

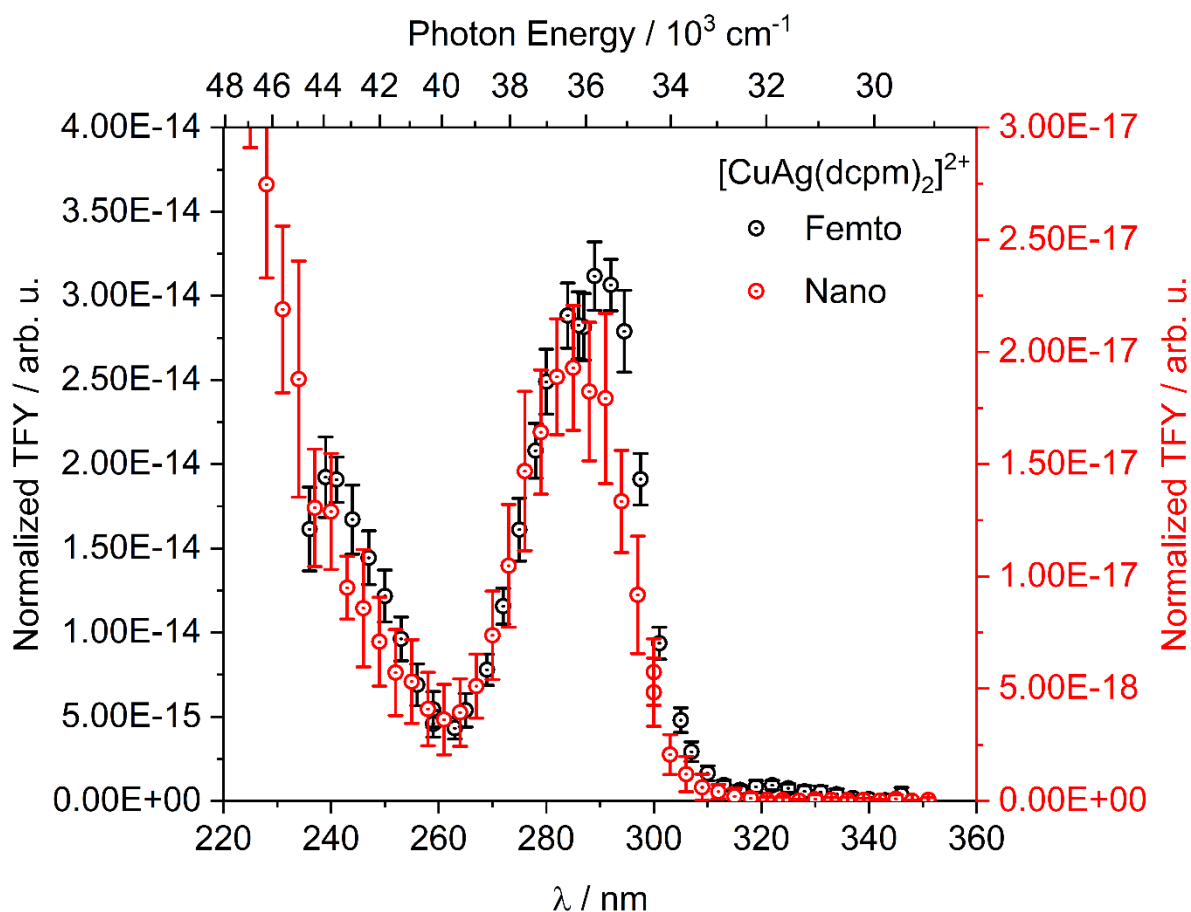

**Fig. S26** Comparison of femtosecond (black circles) and nanosecond (red circles) UV PD total yield spectra of [CuAg(dcpm)<sub>2</sub>]<sup>2+</sup> ions (2  $\mu\text{J}$ , 118 pulses). Spectra were normalized to number of photons. Error bars indicate one standard deviation ( $\pm 1\sigma$ ).

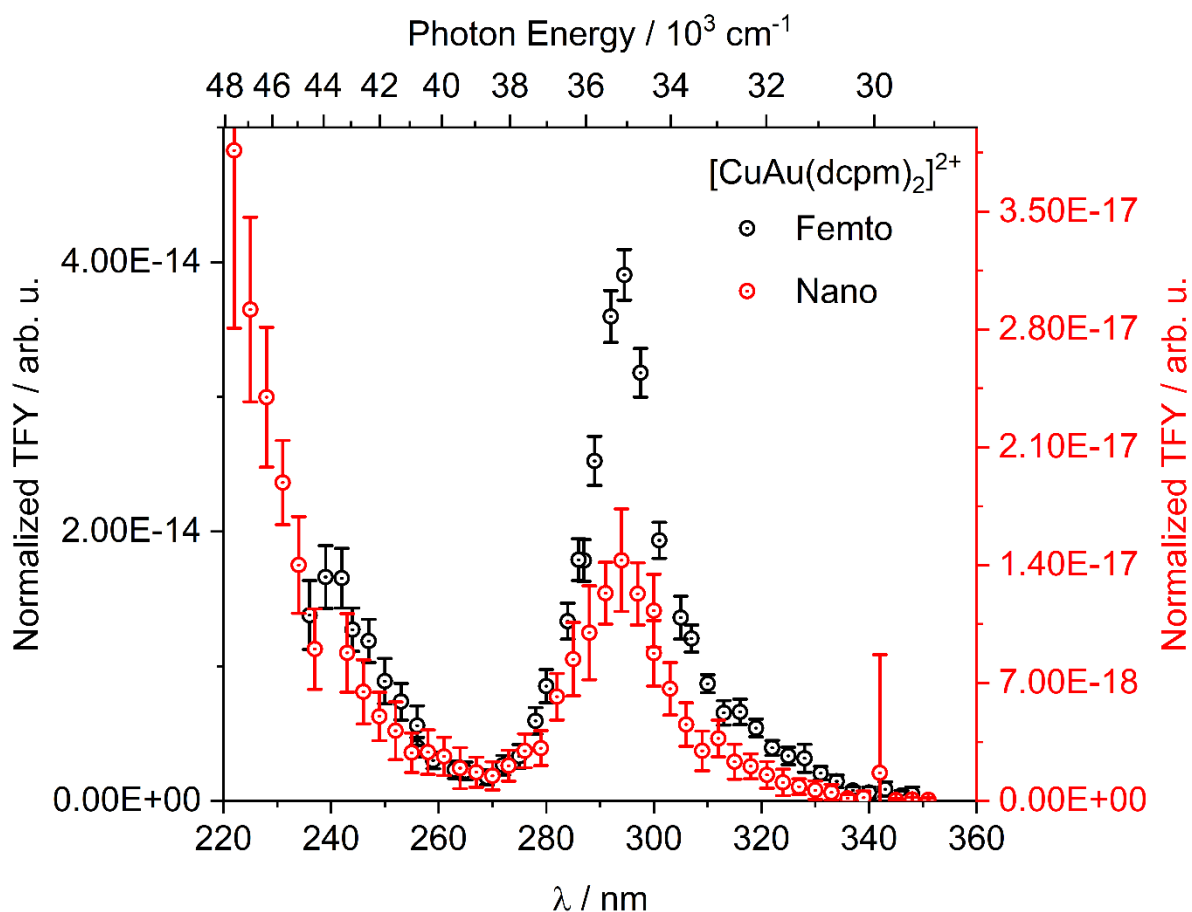

**Fig. S27** Comparison of femtosecond (black circles) and nanosecond (red circles) UV PD total yield spectra of  $[\text{CuAu}(\text{dcpm})_2]^{2+}$  ions (2  $\mu\text{J}$ , 118 pulses). Spectra were normalized to number of photons. Error bars indicate one standard deviation ( $\pm 1\sigma$ ).

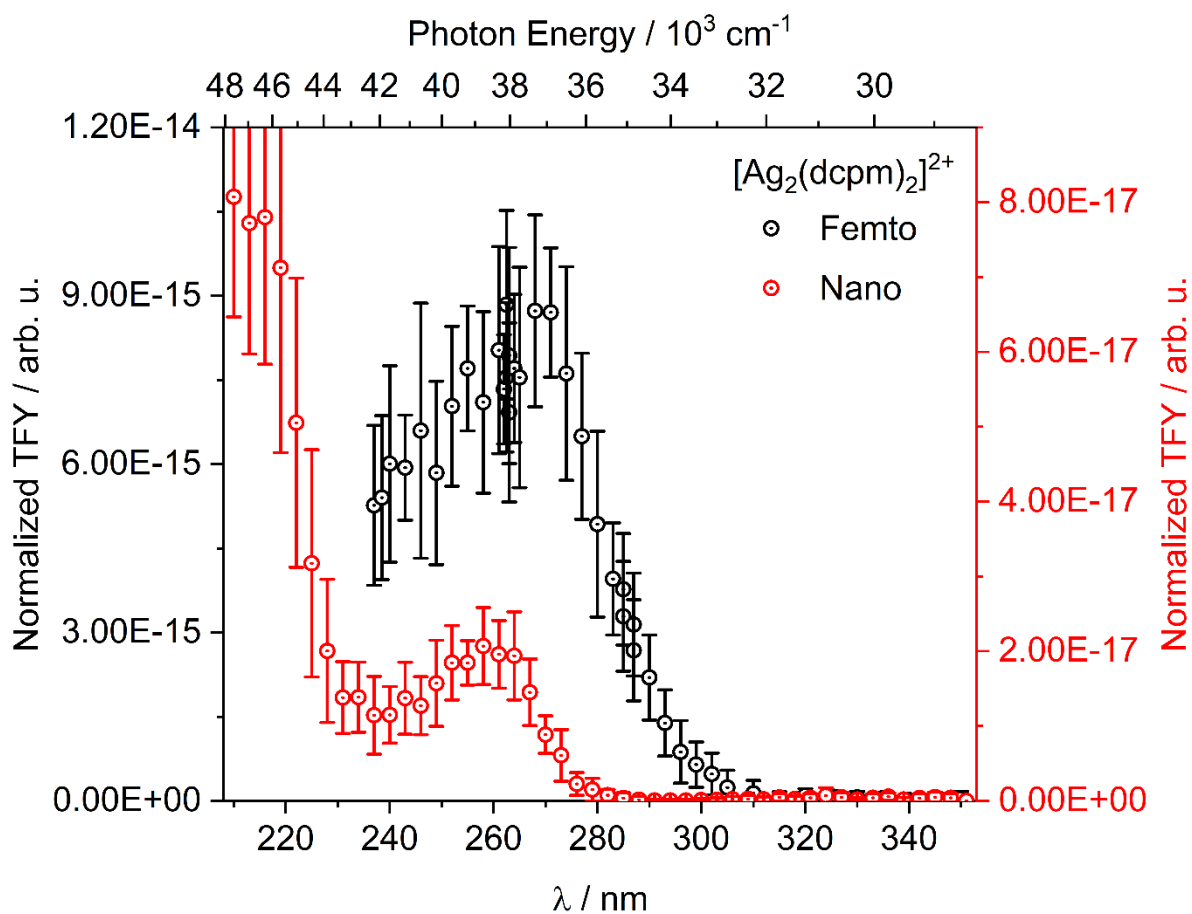

**Fig. S28** Comparison of femtosecond (black circles) and nanosecond (red circles) UV PD total yield spectra of  $[Ag_2(dcpm)_2]^{2+}$  ions ( $2 \mu\text{J}$ , 118 pulses). Spectra were normalized to number of photons. Error bars indicate one standard deviation ( $\pm 1\sigma$ ).

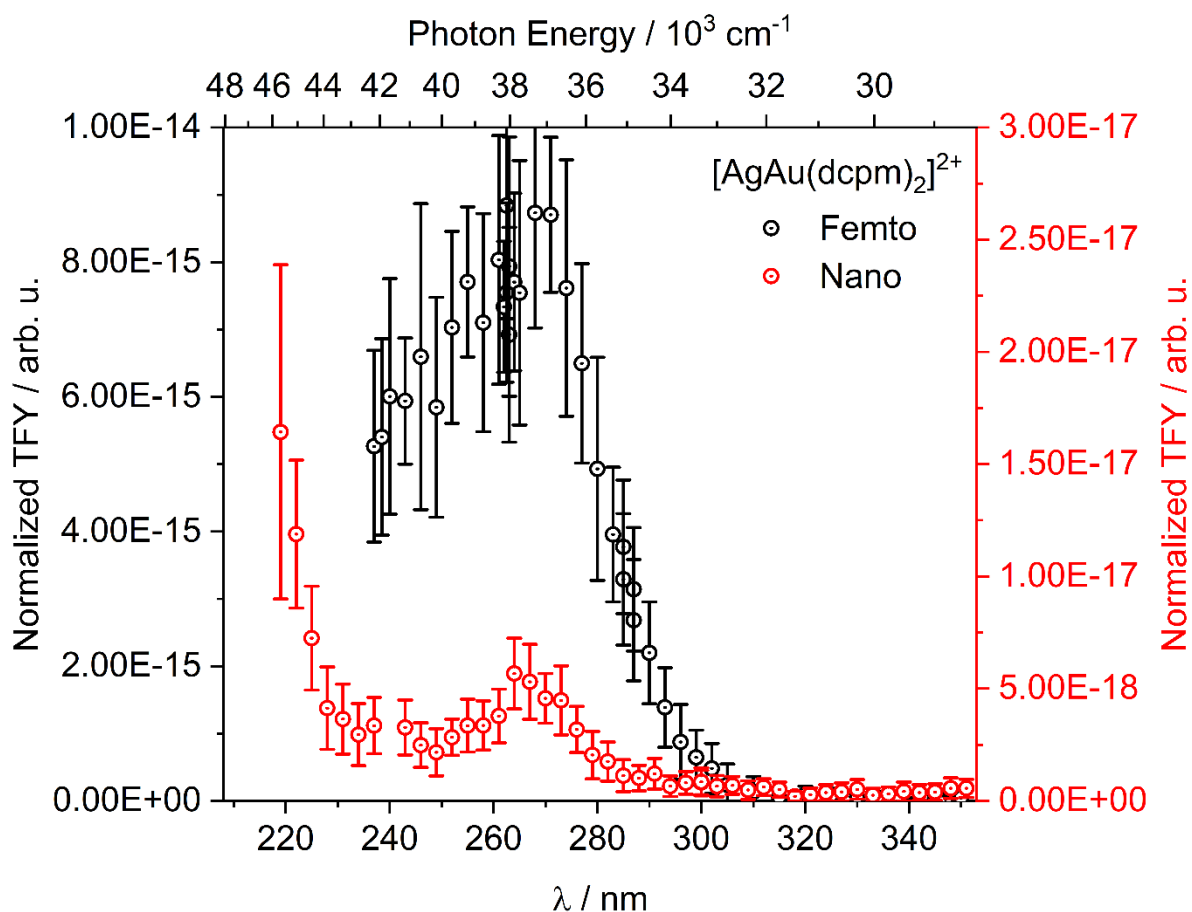

**Fig. S29** Comparison of femtosecond (black circles) and nanosecond (red circles) UV PD total yield spectra of  $[\text{AgAu}(\text{dcpm})_2]^{2+}$  ions ( $2 \mu\text{J}$ , 118 pulses). Spectra were normalized to number of photons. Error bars indicate one standard deviation ( $\pm 1\sigma$ ).

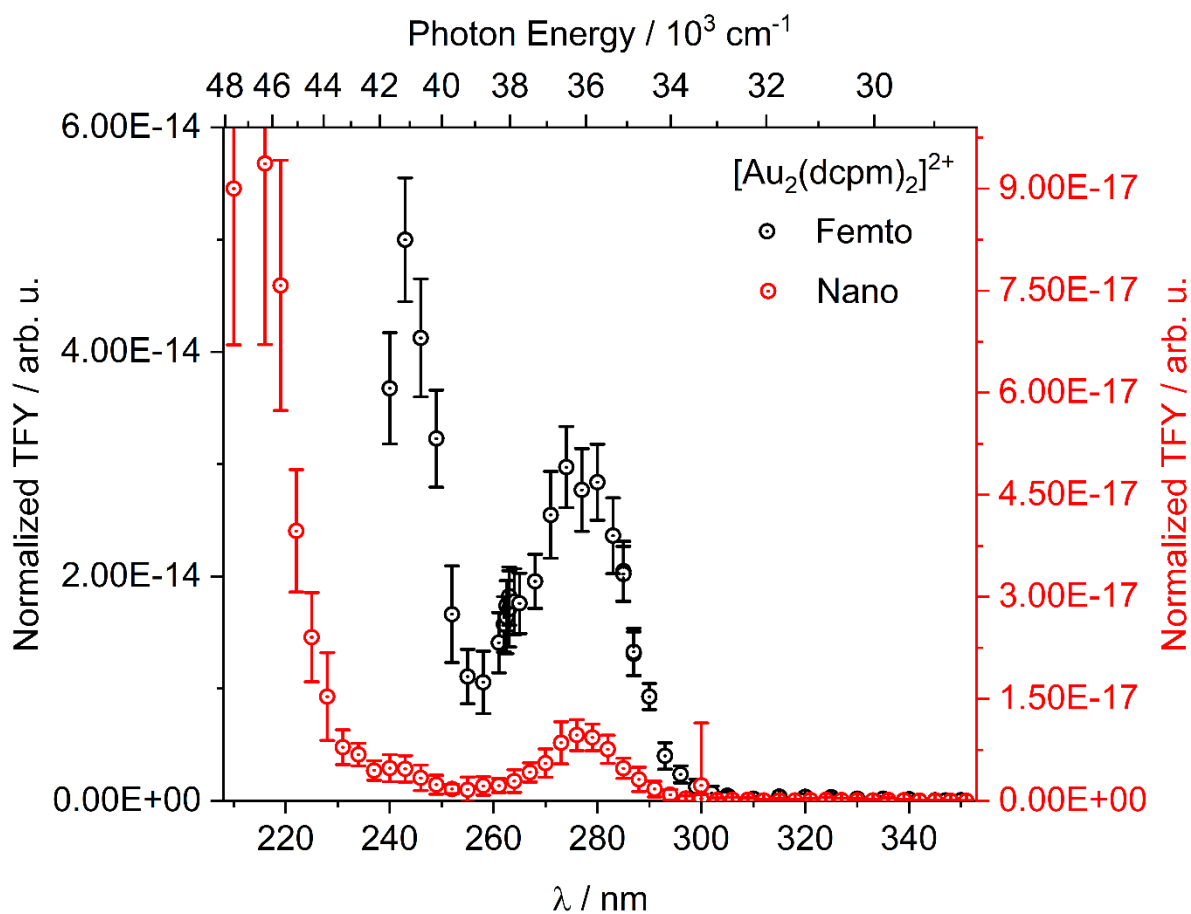

**Fig. S30** Comparison of femtosecond (black circles) and nanosecond (red circles) UV PD total yield spectra of  $[\text{Au}_2(\text{dcpm})_2]^{2+}$  ions ( $2 \mu\text{J}$ , 118 pulses). Spectra were normalized to number of photons. Error bars indicate one standard deviation ( $\pm 1\sigma$ ).

## 5. Trends of electronic transitions

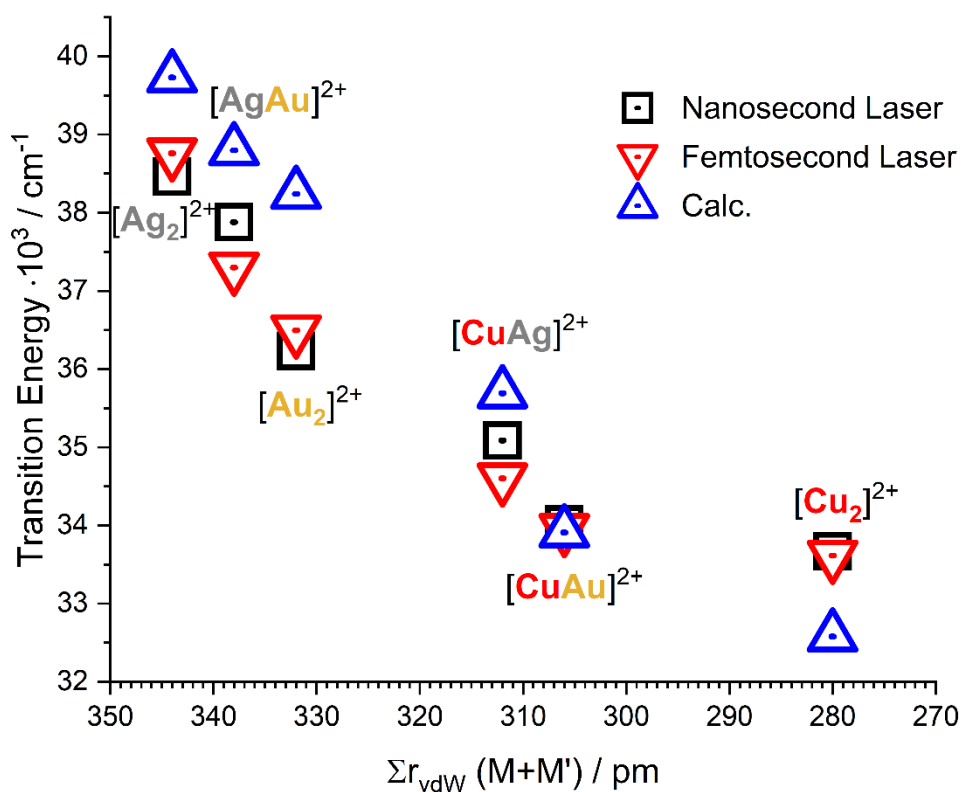

**Fig. S31** Trend of (lowest-energy) bright electronic transitions taken as maximum of UV band position of PD results: nanosecond laser maxima (black open squares), femtosecond laser maxima (red open triangles), and calculated transition energies (blue open triangles) at GW-BSE (PBE0/x2c-TZVPall-2c) level of theory vs. sum of van-der-Waals-radii. Different metal-metal compositions are indicated.



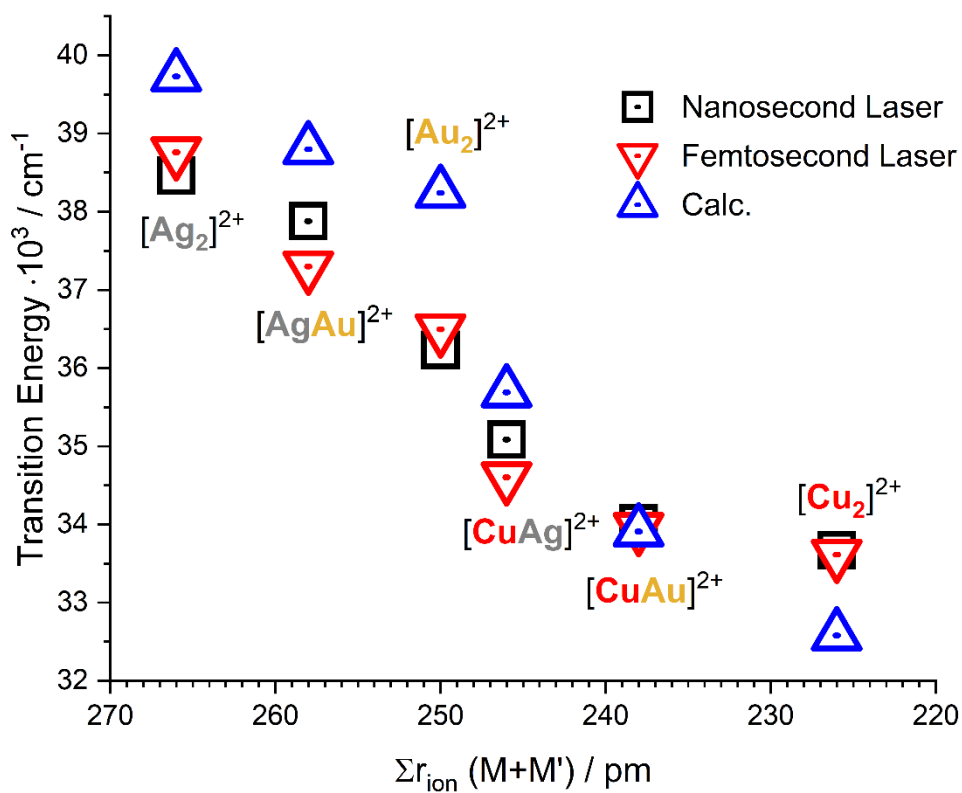

**Fig. S32** Trend of (lowest-energy) bright electronic transitions taken as maximum of UV band position of PD results: nanosecond laser maxima (black open squares), femtosecond laser maxima (red open triangles), and calculated transition energies (blue open triangles) at GW-BSE (PBE0/x2c-TZVPall-2c) level of theory vs. sum of ion-radii. Different metal-metal compositions are indicated.

## 6. Calculated natural population analysis and natural transition orbitals (NTOs)

**Tab. S22** Natural population analysis of the hole and particle unrelaxed difference densities of the bright state of the coinage metal and phosphorus atoms in the model complexes  $[M_1M_2(dcpm)_2]^{2+}$  ( $M_1, M_2 = Cu, Ag, Au$ ). Negative values refer to a loss of electrons, positive values refer to a gain. The metal atom between parentheses indicates the metal atom to which the phosphorus atom is coordinated.

| Comple            | Atom    | Hole Density |        |        | Particle Density |       |       |
|-------------------|---------|--------------|--------|--------|------------------|-------|-------|
|                   |         | s            | p      | d      | s                | p     | d     |
| Ag <sub>2</sub>   | Ag1     | -0.106       | -0.045 | -0.180 | 0.003            | 0.296 | 0.022 |
| (S <sub>1</sub> ) | Ag2     | -0.081       | -0.032 | -0.178 | 0.005            | 0.318 | 0.018 |
|                   | P (Ag1) | -0.009       | -0.050 | -0.003 | 0.003            | 0.011 | 0.012 |
|                   | P (Ag2) | -0.005       | -0.041 | -0.002 | 0.003            | 0.011 | 0.011 |
| AgAu              | Ag1     | -0.078       | -0.030 | -0.230 | 0.002            | 0.209 | 0.022 |
| (S <sub>1</sub> ) | Au2     | -0.098       | -0.065 | -0.170 | 0.002            | 0.419 | 0.026 |
|                   | P (Ag1) | -0.007       | -0.065 | -0.002 | 0.003            | 0.012 | 0.009 |
|                   | P (Au2) | -0.002       | -0.023 | -0.003 | 0.000            | 0.008 | 0.013 |
| Au <sub>2</sub>   | Au1     | -0.123       | -0.052 | -0.219 | 0.002            | 0.301 | 0.028 |
| (S <sub>2</sub> ) | Au2     | -0.120       | -0.056 | -0.220 | 0.002            | 0.327 | 0.025 |
|                   | P (Au1) | -0.002       | -0.028 | -0.002 | 0.001            | 0.009 | 0.011 |
|                   | P (Au2) | -0.001       | -0.021 | -0.003 | 0.001            | 0.008 | 0.011 |
| CuAg              | Cu1     | -0.061       | -0.010 | -0.391 | 0.002            | 0.387 | 0.011 |
| (S <sub>1</sub> ) | Ag2     | -0.053       | -0.041 | -0.137 | 0.003            | 0.245 | 0.031 |
|                   | P (Cu1) | -0.004       | -0.055 | -0.002 | 0.000            | 0.010 | 0.014 |
|                   | P (Ag2) | -0.005       | -0.033 | -0.002 | 0.004            | 0.013 | 0.007 |
| CuAu              | Cu1     | -0.061       | -0.010 | -0.436 | 0.002            | 0.273 | 0.009 |
|                   | Au2     | -0.064       | -0.055 | -0.120 | 0.005            | 0.372 | 0.035 |
|                   | P (Cu1) | -0.008       | -0.056 | -0.003 | 0.001            | 0.011 | 0.011 |
|                   | P (Au2) | -0.001       | -0.013 | -0.002 | 0.000            | 0.011 | 0.011 |
| Cu <sub>2</sub>   | Cu1     | -0.046       | -0.014 | -0.292 | 0.002            | 0.325 | 0.020 |

|                   |         |        |        |        |       |       |       |
|-------------------|---------|--------|--------|--------|-------|-------|-------|
| (S <sub>1</sub> ) | Cu2     | -0.044 | -0.016 | -0.298 | 0.002 | 0.334 | 0.018 |
|                   | P (Cu1) | -0.008 | -0.046 | -0.002 | 0.001 | 0.015 | 0.010 |
|                   | P (Cu2) | -0.007 | -0.037 | -0.002 | 0.002 | 0.015 | 0.009 |

**Tab. S23** Natural population analysis of the hole and particle unrelaxed difference densities of the dark state of the coinage metal and phosphorus atoms in the model complexes  $[M_1M_2(dcpm)_2]^{2+}$  ( $M_1, M_2 = Cu, Ag, Au$ ). Negative values refer to a loss of electrons, positive values refer to a gain. The metal atom between parentheses indicates the metal atom to which the phosphorus atom is coordinated.

| Comple            | Atom    | Hole Density |        |        | Particle Density |       |       |
|-------------------|---------|--------------|--------|--------|------------------|-------|-------|
|                   |         | S            | p      | d      | S                | p     | d     |
| Ag <sub>2</sub>   | Ag1     | -0.075       | -0.044 | -0.189 | 0.000            | 0.306 | 0.011 |
| (S <sub>2</sub> ) | Ag2     | -0.073       | -0.043 | -0.186 | 0.001            | 0.299 | 0.010 |
|                   | P (Ag1) | -0.007       | -0.065 | -0.001 | 0.001            | 0.005 | 0.016 |
|                   | P (Ag2) | -0.006       | -0.047 | -0.002 | 0.000            | 0.005 | 0.017 |
| AgAu              | Ag1     | -0.068       | -0.031 | -0.232 | 0.000            | 0.258 | 0.008 |
| (S <sub>2</sub> ) | Au2     | -0.101       | -0.068 | -0.184 | 0.000            | 0.375 | 0.013 |
|                   | P (Ag1) | -0.007       | -0.065 | -0.002 | 0.001            | 0.004 | 0.014 |
|                   | P (Au2) | -0.002       | -0.024 | -0.002 | 0.000            | 0.004 | 0.018 |
| Au <sub>2</sub>   | Au1     | -0.122       | -0.054 | -0.231 | 0.000            | 0.329 | 0.013 |
| (S <sub>1</sub> ) | Au2     | -0.117       | -0.059 | -0.227 | 0.000            | 0.322 | 0.012 |
|                   | P (Au1) | -0.002       | -0.029 | -0.002 | 0.001            | 0.004 | 0.015 |
|                   | P(Au2)  | -0.001       | -0.022 | -0.002 | 0.000            | 0.003 | 0.015 |
| CuAg              | Cu1     | -0.060       | -0.010 | -0.402 | 0.001            | 0.436 | 0.011 |
| (S <sub>2</sub> ) | Ag2     | -0.047       | -0.046 | -0.139 | 0.000            | 0.191 | 0.015 |
|                   | P (Cu1) | -0.007       | -0.055 | -0.001 | 0.001            | 0.006 | 0.019 |
|                   | P (Ag2) | -0.005       | -0.035 | -0.001 | 0.000            | 0.003 | 0.011 |
| CuAu              | Cu1     | -0.053       | -0.010 | -0.445 | 0.001            | 0.387 | 0.006 |
|                   | Au2     | -0.064       | -0.057 | -0.122 | 0.000            | 0.256 | 0.018 |
|                   | P (Cu1) | -0.009       | -0.057 | -0.002 | 0.001            | 0.005 | 0.018 |
|                   | P (Au2) | -0.000       | -0.016 | -0.001 | 0.000            | 0.002 | 0.009 |
| Cu <sub>2</sub>   | Cu1     | -0.048       | -0.017 | -0.298 | 0.002            | 0.333 | 0.011 |
| (S <sub>2</sub> ) | Cu2     | -0.045       | -0.019 | -0.294 | 0.000            | 0.303 | 0.011 |
|                   | P (Cu1) | -0.008       | -0.048 | -0.001 | 0.001            | 0.004 | 0.014 |
|                   | P (Cu2) | -0.008       | -0.038 | -0.001 | 0.000            | 0.005 | 0.015 |

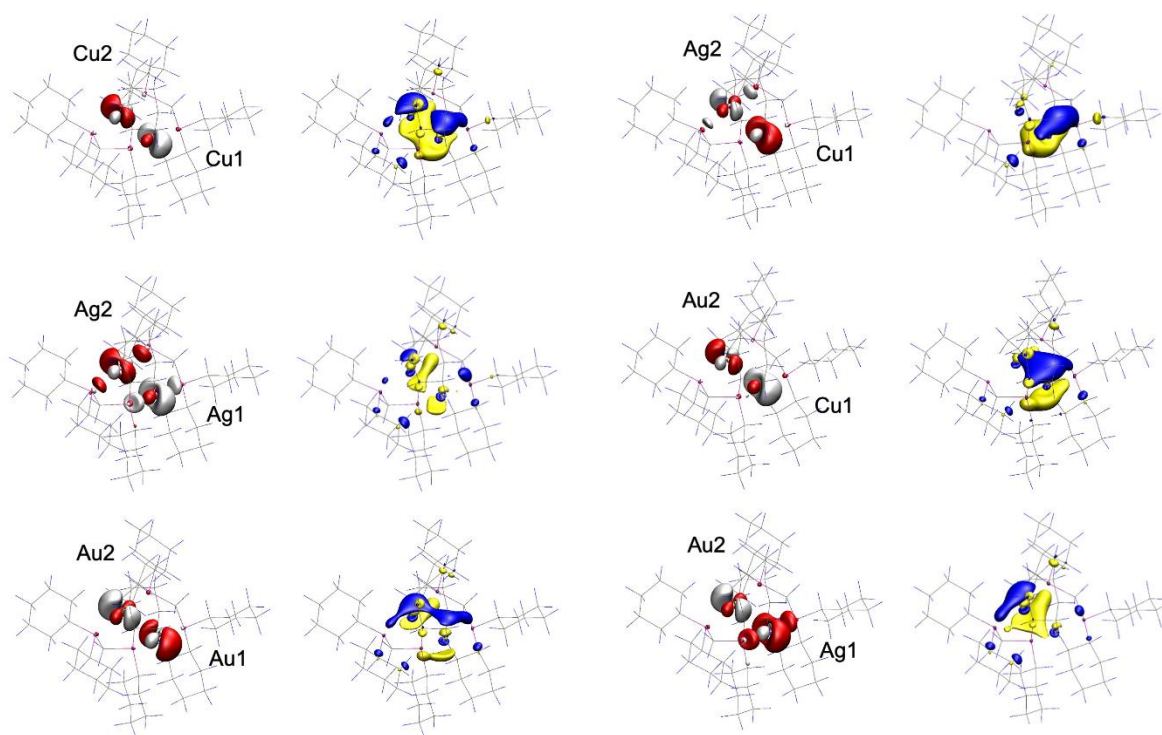

**Fig. S33** Hole (1. and 3. column, red/white) and particle (2. and 4. column, blue/yellow) natural transition orbitals (NTOs) of the dark state, plotted with an isovalue of  $\pm 0.05 a_0^{-3/2}$ . Homometallic (left) and heterometallic (right) species are displayed.

## 7. Calculated GW quasiparticle energies

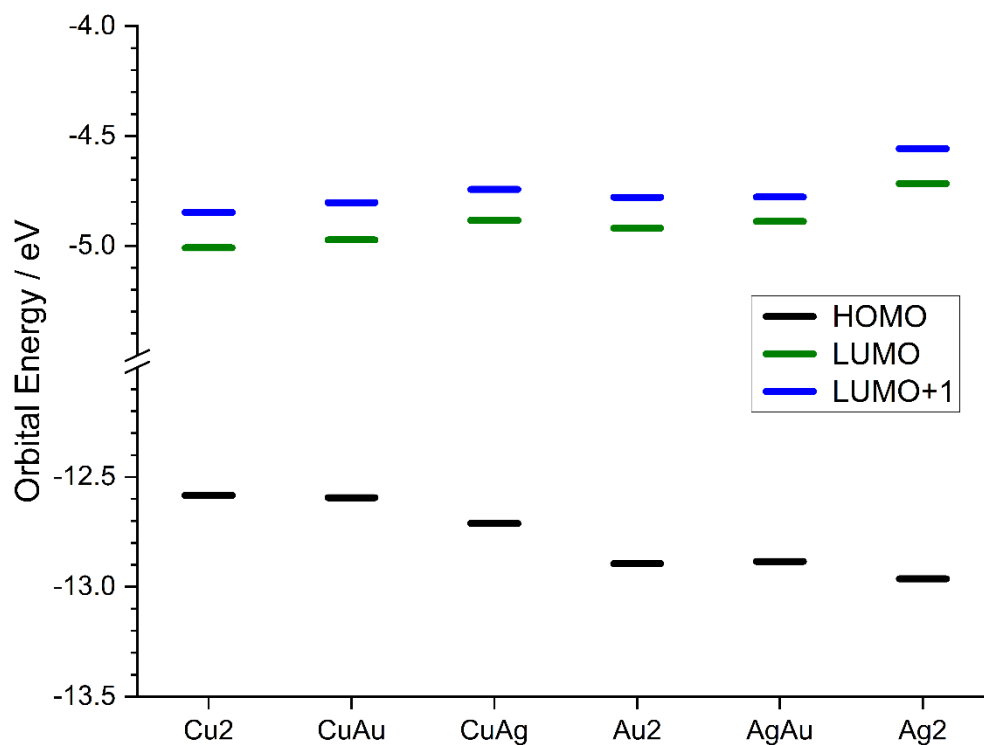

**Fig. S34** HOMO (black), LUMO (green), and LUMO+1 (blue) quasiparticle energies in eV of the metal complexes  $[MM'(dcpm)_2]^{2+}$  at the GW (PBE0/x2c-TZVPall-2c) level of theory.

## 8. Hybridization and distance variation

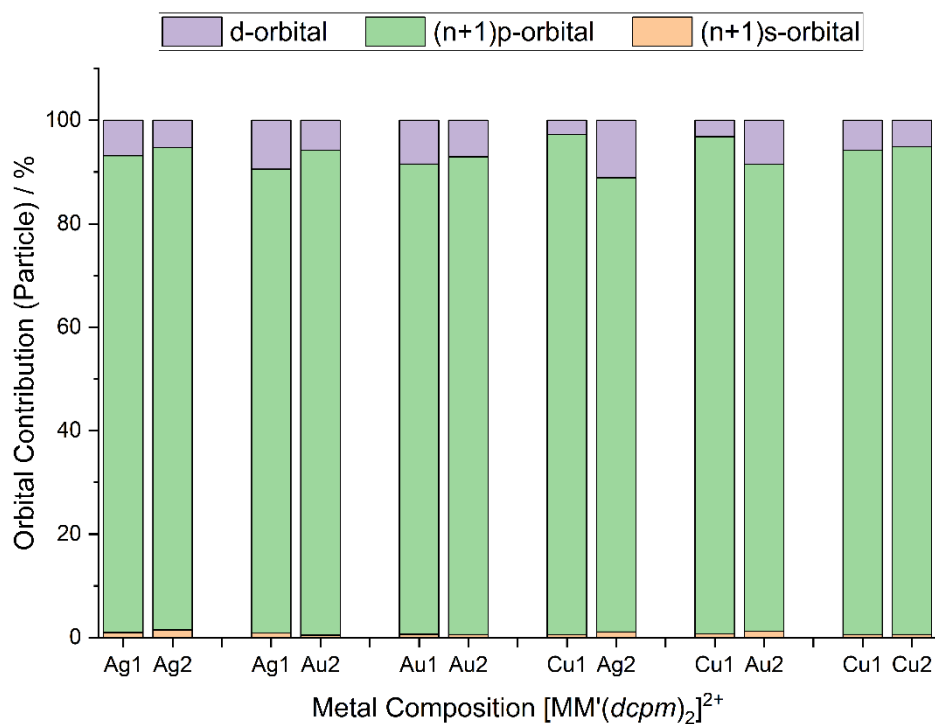

**Fig. S35** Orbital contributions of  $[MM'(dcpm)_2]^{2+}$  complexes of the particle-unrelaxed difference densities of the bright state at  $GW$ -BSE (PBE0/x2c-TZVPall-2c) level of theory.

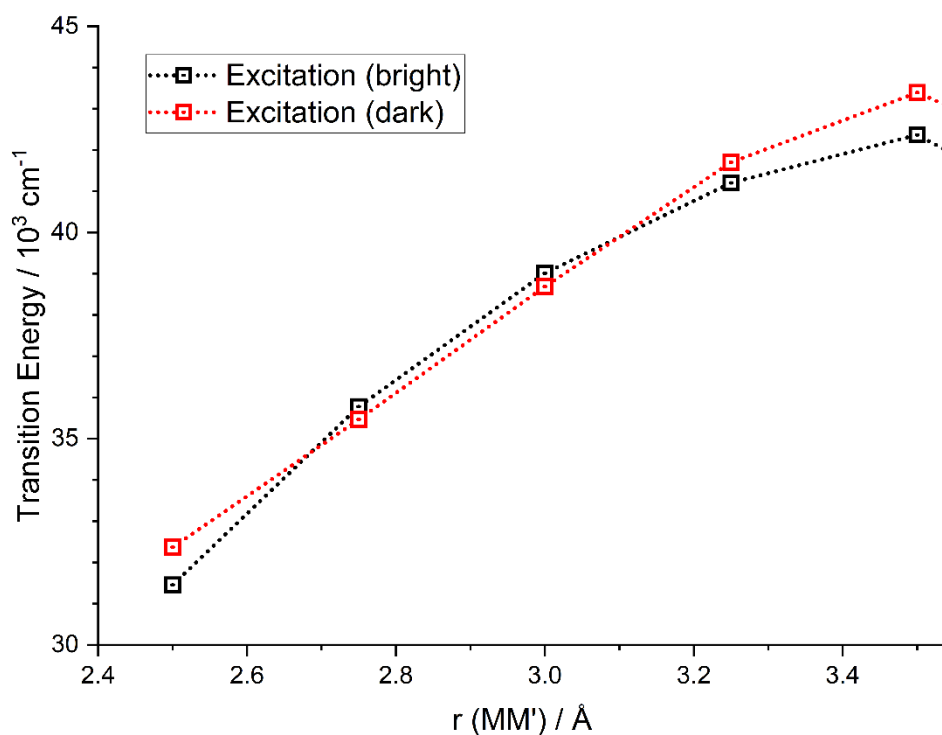

**Fig. S36** Bright and dark electronic transition energies of  $[Au_2(dcpm)_2]^{2+}$  complex as a function of Au-Au distance between two  $[Au(dcpm)]^+$  monomers.

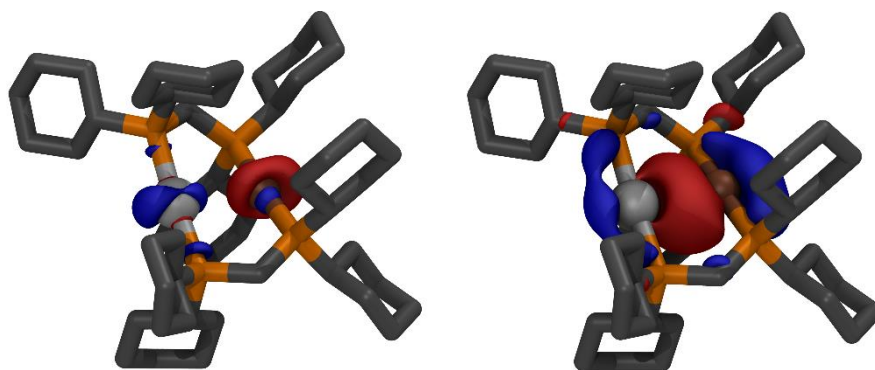

**Fig. S37** Hole (left) and particle (right) natural transition orbitals of the bright electronic transition of  $[\text{CuAg}(\text{dcpm})_2]^{2+}$  complex at M-M' distance  $d = 2.8 \text{ \AA}$  between  $[\text{Cu}(\text{dcpm})]^+$  and  $[\text{Ag}(\text{dcpm})]^+$  monomers.



## 9. Calculated transition energy properties and charge distribution

**Tab. S24** Optimized metal–metal distances ( $d$  in pm) and natural population analysis (partial charge  $q$  in units of  $e$ ) of the atoms  $M_1$  and  $M_2$  in  $[M_1M_2(dcpm)_2]^{2+}$ .

| Complex         | $R$ (pm) | $M_1$ | $M_2$ | $q(M_1)$ | $q(M_2)$ |
|-----------------|----------|-------|-------|----------|----------|
| Ag <sub>2</sub> | 293.0    | Ag    | Ag    | 0.484    | 0.488    |
| AgAu            | 292.2    | Ag    | Au    | 0.494    | 0.256    |
| Au <sub>2</sub> | 293.4    | Au    | Au    | 0.264    | 0.266    |
| CuAg            | 278.0    | Cu    | Ag    | 0.496    | 0.492    |
| CuAu            | 277.9    | Cu    | Au    | 0.512    | 0.263    |
| Cu <sub>2</sub> | 266.1    | Cu    | Cu    | 0.490    | 0.492    |

**Tab. S25** Vertical electronic excitation energies of  $[M_1M_2(dcpm)_2]^{2+}$  as obtained at the BSE level ( $M_1, M_2 = \text{Cu, Ag, Au}$ ).

| Complex         | State          | Energy ( $10^3 \text{ cm}^{-1}$ ) | Wavelength (nm) | Oscillator Strength | Weight of Main NTO Pair |
|-----------------|----------------|-----------------------------------|-----------------|---------------------|-------------------------|
| Ag <sub>2</sub> | S <sub>1</sub> | 39.73                             | 252             | 0.3489              | 97.7 %                  |
|                 | S <sub>2</sub> | 40.60                             | 246             | 0.0148              | 98.0 %                  |
| AgAu            | S <sub>1</sub> | 38.80                             | 258             | 0.3373              | 97.8 %                  |
|                 | S <sub>2</sub> | 39.26                             | 255             | 0.0123              | 98.5 %                  |
| Au <sub>2</sub> | S <sub>1</sub> | 37.97                             | 263             | 0.0088              | 98.7 %                  |
|                 | S <sub>2</sub> | 38.24                             | 261             | 0.3595              | 97.6 %                  |
| CuAg            | S <sub>1</sub> | 35.69                             | 280             | 0.2694              | 97.6 %                  |
|                 | S <sub>2</sub> | 36.16                             | 277             | 0.0259              | 98.2 %                  |
| CuAu            | S <sub>1</sub> | 33.91                             | 295             | 0.2628              | 97.9 %                  |
|                 | S <sub>2</sub> | 35.59                             | 281             | 0.0224              | 98.5 %                  |
| Cu <sub>2</sub> | S <sub>1</sub> | 32.58                             | 307             | 0.2545              | 97.3 %                  |
|                 | S <sub>2</sub> | 33.61                             | 298             | 0.0069              | 97.9 %                  |

## 10. Cooperativity

We try to consider cooperativity of metal-metal-interactions in the case of electronic excitation energies. When, in general, cooperativity means *not to be able* to predict properties of a three- or two-body system from the characteristics of its components, we may establish a possibility to determine the *non-additivity* for the electronic energies of the complexes under investigation. Therefore, the transition energies of the homometallic species were compared with those of the heterometallic ones. Assuming the different homometallic nuclei would have the same “contribution” to the excitation energy, the energy of the corresponding heterometallic complexes should lie in the center of the corresponding homometallic ones. If not, there must be a cooperative effect. To quantify that influence following equation was used:<sup>1</sup>

$$\Delta E_{coop} = \frac{E(M_2) + E(M'_2)}{2} - E(MM')$$

where  $E(M_2)$  and  $E(M'_2)$  are the electronic transition energies of two different homo- and  $E(MM')$  of the heterometallic complex.  $\Delta E_{coop}$  describes the quantified cooperative effect.

**Tab. S26** Experimental excitation energies of homo- and heterometallic complexes and calculated cooperative effect  $\Delta E_{coop}$  in wavenumbers ( $10^3 \text{ cm}^{-1}$ ).

|                                                       | MM    | M'M'  | MM'   | $\Delta E_{coop}$ |
|-------------------------------------------------------|-------|-------|-------|-------------------|
| $E(M=\text{Cu}, M'=\text{Ag}) / 10^3 \text{ cm}^{-1}$ | 33.61 | 38.76 | 34.60 | 1.59              |
| $E(M=\text{Cu}, M'=\text{Au}) / 10^3 \text{ cm}^{-1}$ | 33.61 | 36.50 | 33.96 | 1.10              |
| $E(M=\text{Au}, M'=\text{Ag}) / 10^3 \text{ cm}^{-1}$ | 36.50 | 38.76 | 37.30 | 0.33              |

The used experimental excitation energies and resulting  $\Delta E_{coop}$  are displayed in Tab. S26. The decreasing calculated deviation from the expected center value is demonstrated in the sequence:  $[\text{CuAg}]^{2+} > [\text{CuAu}]^{2+} \gg [\text{AgAu}]^{2+}$ . The cooperative effect for  $[\text{AgAu}]^{2+}$  is negligible, however copper seems to expose a strong effect in the mixed complexes  $[\text{CuAu}]^{2+}$  and even larger in  $[\text{CuAg}]^{2+}$ . A peculiarity in the bonding situation of homogeneous copper complexes with different ligands (in order to modulate their metal-metal distance) was also inferred from Resonance Raman spectroscopy experiments and obtained force constants and ascribed to

<sup>1</sup> J. Chmela, M. E. Harding, D. Matioszek, C. E. Anson, F. Breher and W. Klopper, *ChemPhysChem*, 2016, **17**, 37–45.

solvent interaction.<sup>2</sup> Here, we show with our analysis above that intrinsic effects are of likewise importance.

---

<sup>2</sup> C.-M. Che and S.-W. Lai, *Coord. Chem. Rev.*, 2005, **249**, 1296–1309.

## 11. Geometry Optimized Structures

**Tab. S27** Cartesian coordinates in Å of the optimized ground state structure of  $[\text{Ag}_2(\text{dcpm})_2]^{2+}$  ( $C_2$  symmetry) obtained at the PBE0/x2c-TZVPPall-2c level of theory.

148

|    |            |            |            |
|----|------------|------------|------------|
| C  | 0.2894371  | 3.3243005  | 0.0932339  |
| P  | -0.2969282 | 2.3817176  | -1.3760108 |
| Ag | 0.0844771  | 0.0031533  | -1.3460330 |
| P  | 0.3112789  | -2.3930810 | -1.3825840 |
| C  | -0.1075676 | -3.2590308 | 0.1928580  |
| P  | -0.7913050 | -2.2519627 | 1.5741444  |
| Ag | -0.2202113 | 0.0852367  | 1.5674124  |
| P  | 0.6299237  | 2.3409806  | 1.6126731  |
| H  | -0.4637433 | 4.0914739  | 0.3337274  |
| H  | 1.2113321  | 3.8596127  | -0.1844975 |
| H  | -0.8035389 | -4.0850004 | -0.0270090 |
| H  | 0.8166376  | -3.7210767 | 0.5717051  |
| C  | -4.7198075 | -2.1636677 | 0.1879076  |
| C  | -3.2014437 | -2.0057209 | 0.2168840  |
| C  | -2.6022775 | -2.5205012 | 1.5288449  |
| C  | -3.2692646 | -1.8490701 | 2.7356465  |
| C  | -4.7883451 | -2.0036241 | 2.6944133  |
| C  | -5.3738403 | -1.4863513 | 1.3861581  |
| H  | -4.9719435 | -3.2406590 | 0.1895883  |
| H  | -2.9420676 | -0.9361746 | 0.0981355  |
| H  | -2.7677310 | -3.6124445 | 1.5892175  |
| H  | -3.0098079 | -0.7697950 | 2.7341067  |
| H  | -5.0457745 | -3.0723258 | 2.8163692  |
| H  | -5.2173507 | -0.3919102 | 1.3198722  |
| H  | -5.1159811 | -1.7533513 | -0.7570964 |
| H  | -2.7589082 | -2.5323295 | -0.6450435 |
| H  | -2.8811710 | -2.2670669 | 3.6799551  |
| H  | -5.2341023 | -1.4783281 | 3.5558601  |
| H  | -6.4647989 | -1.6460457 | 1.3663670  |
| C  | 1.8389427  | -3.3642949 | 4.6039207  |
| C  | 1.3335827  | -2.7874469 | 3.2832205  |
| C  | -0.1645947 | -3.0598132 | 3.0972868  |
| C  | -0.4832485 | -4.5537488 | 3.2126347  |
| C  | 0.0371198  | -5.1217878 | 4.5332839  |
| C  | 1.5265984  | -4.8527938 | 4.7161352  |
| H  | 1.3609188  | -2.8215401 | 5.4412308  |
| H  | 1.9038525  | -3.2480462 | 2.4536013  |
| H  | -0.6979263 | -2.5243302 | 3.9058712  |
| H  | -0.0094267 | -5.0985664 | 2.3737714  |
| H  | -0.5262011 | -4.6661008 | 5.3693336  |
| H  | 2.0983553  | -5.4068899 | 3.9469276  |
| H  | 2.9242618  | -3.1869286 | 4.6944845  |
| H  | 1.5328346  | -1.6995276 | 3.2358141  |
| H  | -1.5699395 | -4.7295214 | 3.1340929  |
| H  | -0.1695496 | -6.2045001 | 4.5736880  |
| H  | 1.8662004  | -5.2396304 | 5.6914200  |
| C  | 4.4704992  | 1.1633295  | 0.5401207  |
| C  | -2.0477560 | -2.9728155 | -4.7899434 |

|   |            |            |            |
|---|------------|------------|------------|
| C | 0.6985803  | 5.3331238  | -4.1952690 |
| C | 2.9617008  | 1.3835624  | 0.4933729  |
| C | -1.0255386 | -2.3214622 | -3.8602819 |
| C | 0.1075041  | 4.7261448  | -2.9224506 |
| C | 2.4589457  | 2.2165078  | 1.6754949  |
| C | -0.7776621 | -3.1989283 | -2.6276916 |
| C | 0.4288707  | 3.2309314  | -2.8300543 |
| C | 2.9128103  | 1.6083715  | 3.0078037  |
| C | -0.3611914 | -4.6235064 | -3.0082597 |
| C | 1.9366701  | 2.9730084  | -2.9353846 |
| C | 4.4226915  | 1.3787963  | 3.0400770  |
| C | -1.3942780 | -5.2542910 | -3.9414965 |
| C | 2.5102146  | 3.5847822  | -4.2121965 |
| C | 4.8941718  | 0.5347679  | 1.8619060  |
| C | -1.6337208 | -4.3896890 | -5.1746376 |
| C | 2.1970778  | 5.0744531  | -4.3029697 |
| H | 4.9858057  | 2.1330025  | 0.4081200  |
| H | -3.0310645 | -3.0017445 | -4.2821740 |
| H | 0.1846271  | 4.8992081  | -5.0736889 |
| H | 2.4541177  | 0.3989951  | 0.5242662  |
| H | -0.0806650 | -2.1613880 | -4.4098633 |
| H | 0.5281089  | 5.2489198  | -2.0421951 |
| H | 2.8626122  | 3.2423788  | 1.5900759  |
| H | -1.7436004 | -3.2674413 | -2.0917418 |
| H | -0.0513335 | 2.7155779  | -3.6839840 |
| H | 2.3932503  | 0.6388830  | 3.1569815  |
| H | 0.6177445  | -4.6006577 | -3.5201606 |
| H | 2.4536413  | 3.4233263  | -2.0661754 |
| H | 4.9377200  | 2.3572777  | 3.0192699  |
| H | -2.3462968 | -5.3899584 | -3.3935475 |
| H | 2.0817256  | 3.0614185  | -5.0878088 |
| H | 4.4615105  | -0.4826096 | 1.9398541  |
| H | -0.7083588 | -4.3501200 | -5.7804448 |
| H | 2.7229518  | 5.6101382  | -3.4893508 |
| H | 4.7776378  | 0.5309335  | -0.3113664 |
| H | -2.1793247 | -2.3495867 | -5.6907897 |
| H | 0.4887785  | 6.4157936  | -4.2165659 |
| H | 2.6792479  | 1.8507499  | -0.4650404 |
| H | -1.3785036 | -1.3209846 | -3.5439830 |
| H | -0.9827794 | 4.8949901  | -2.9029541 |
| H | 2.6204701  | 2.2564193  | 3.8511356  |
| H | -0.2325494 | -5.2493591 | -2.1064964 |
| H | 2.1418758  | 1.8861251  | -2.9021222 |
| H | 4.7003960  | 0.9041698  | 3.9963093  |
| H | -1.0573813 | -6.2628958 | -4.2346236 |
| H | 3.5996218  | 3.4138178  | -4.2472909 |
| H | 5.9896877  | 0.4115981  | 1.8945328  |
| H | -2.4037225 | -4.8485875 | -5.8170899 |
| H | 2.5876363  | 5.4881851  | -5.2476537 |
| C | -1.7981617 | 4.3109729  | 4.3737045  |
| C | 3.9792127  | -2.7129317 | -3.3416030 |
| C | -4.2280066 | 2.2824503  | -2.7439649 |
| C | -1.3976646 | 3.5293447  | 3.1236954  |
| C | 2.5142868  | -2.3674791 | -3.0800174 |
| C | -2.7116068 | 2.1012318  | -2.7089733 |
| C | 0.1260425  | 3.3970896  | 3.0232727  |
| C | 2.0508918  | -2.8803590 | -1.7110940 |
| C | -2.1030467 | 2.6896396  | -1.4306389 |
| C | 0.8108293  | 4.7675530  | 3.0623850  |

|   |            |            |            |
|---|------------|------------|------------|
| C | 2.9739596  | -2.3528888 | -0.6070526 |
| C | -2.7877726 | 2.1198415  | -0.1849991 |
| C | 0.3920034  | 5.5507728  | 4.3069540  |
| C | 4.4350938  | -2.7080328 | -0.8715742 |
| C | -4.3010177 | 2.3131600  | -0.2330691 |
| C | -1.1233962 | 5.6778727  | 4.4131060  |
| C | 4.8909068  | -2.1998571 | -2.2340863 |
| C | -4.8969777 | 1.7107913  | -1.4997346 |
| H | -1.5126825 | 3.7296432  | 5.2707324  |
| H | 4.0804987  | -3.8113874 | -3.4227596 |
| H | -4.4604025 | 3.3608322  | -2.8230665 |
| H | -1.7837086 | 4.0657743  | 2.2357422  |
| H | 2.3823242  | -1.2660269 | -3.1141313 |
| H | -2.4693159 | 1.0189083  | -2.7575888 |
| H | 0.4620351  | 2.8114725  | 3.9005532  |
| H | 2.0798313  | -3.9860413 | -1.7103846 |
| H | -2.2426738 | 3.7867379  | -1.4387171 |
| H | 0.5323637  | 5.3441987  | 2.1595340  |
| H | 2.8733889  | -1.2523908 | -0.5645866 |
| H | -2.5630293 | 1.0368694  | -0.1195172 |
| H | 0.7833573  | 5.0359941  | 5.2046887  |
| H | 4.5578669  | -3.8062556 | -0.8250815 |
| H | -4.5305276 | 3.3944732  | -0.1934451 |
| H | -1.5006988 | 6.2975147  | 3.5769193  |
| H | 4.8827315  | -1.0919883 | -2.2344435 |
| H | -4.7627317 | 0.6111922  | -1.4810790 |
| H | -2.8957031 | 4.4181629  | 4.4065759  |
| H | 4.2834379  | -2.3016606 | -4.3189324 |
| H | -4.6329916 | 1.8119135  | -3.6557704 |
| H | -1.8696951 | 2.5291300  | 3.1259191  |
| H | 1.8895859  | -2.7839205 | -3.8860940 |
| H | -2.2641594 | 2.5654616  | -3.6041255 |
| H | 1.9087427  | 4.6588616  | 3.0451858  |
| H | 2.6738361  | -2.7325391 | 0.3850515  |
| H | -2.3818116 | 2.5791649  | 0.7308042  |
| H | 0.8653122  | 6.5469436  | 4.2894053  |
| H | 5.0657468  | -2.2902544 | -0.0675344 |
| H | -4.7594735 | 1.8661943  | 0.6661434  |
| H | -1.3964679 | 6.2103338  | 5.3394140  |
| H | 5.9337851  | -2.5023937 | -2.4264703 |
| H | -5.9844820 | 1.8907575  | -1.5343481 |

**Tab. S28** Cartesian coordinates in Å of the optimized ground state structure of  $[\text{AgAu}(\text{dcpm})_2]^{2+}$  ( $C_2$  symmetry) obtained at the PBE0/x2c-TZVPPall-2c level of theory.

148

|    |            |            |            |
|----|------------|------------|------------|
| C  | 0.2669968  | 3.2699763  | 0.0947402  |
| P  | -0.2651739 | 2.3826348  | -1.4325932 |
| Ag | 0.0513352  | -0.0020625 | -1.3990136 |
| P  | 0.2468478  | -2.3982394 | -1.4109105 |
| C  | -0.1143995 | -3.2267611 | 0.2012058  |
| P  | -0.7453358 | -2.2015874 | 1.5881814  |
| Au | -0.1439301 | 0.0504379  | 1.5155701  |
| P  | 0.6309971  | 2.2529645  | 1.5820291  |
| H  | -0.5148860 | 3.9993058  | 0.3594643  |
| H  | 1.1735637  | 3.8497762  | -0.1410664 |
| H  | -0.8239332 | -4.0519649 | 0.0269811  |
| H  | 0.8209217  | -3.6870362 | 0.5541446  |
| C  | -4.7052949 | -2.0193457 | 0.3208413  |
| C  | -3.1841908 | -1.8897648 | 0.3086855  |
| C  | -2.5583496 | -2.4288819 | 1.5983528  |
| C  | -3.1776194 | -1.7608386 | 2.8325350  |
| C  | -4.6995783 | -1.8897583 | 2.8304873  |
| C  | -5.3117703 | -1.3451805 | 1.5457627  |
| H  | -4.9791327 | -3.0910539 | 0.3154005  |
| H  | -2.9083976 | -0.8246992 | 0.1981773  |
| H  | -2.7373545 | -3.5191430 | 1.6522490  |
| H  | -2.8976359 | -0.6876628 | 2.8376803  |
| H  | -4.9724800 | -2.9554299 | 2.9458528  |
| H  | -5.1360069 | -0.2531781 | 1.4884308  |
| H  | -5.1188089 | -1.5875618 | -0.6071453 |
| H  | -2.7740447 | -2.4128852 | -0.5716824 |
| H  | -2.7709750 | -2.1998536 | 3.7592860  |
| H  | -5.1123308 | -1.3683450 | 3.7105126  |
| H  | -6.4056872 | -1.4842048 | 1.5552351  |
| C  | 1.9677256  | -3.3104052 | 4.5425586  |
| C  | 1.4335434  | -2.7521476 | 3.2252646  |
| C  | -0.0788589 | -2.9792022 | 3.1051152  |
| C  | -0.4420501 | -4.4587267 | 3.2694769  |
| C  | 0.1101622  | -5.0101739 | 4.5842233  |
| C  | 1.6130683  | -4.7845943 | 4.7060661  |
| H  | 1.5385219  | -2.7304714 | 5.3813448  |
| H  | 1.9562821  | -3.2559543 | 2.3896484  |
| H  | -0.5630342 | -2.4049380 | 3.9177264  |
| H  | -0.0187965 | -5.0390347 | 2.4273390  |
| H  | -0.4076022 | -4.5162248 | 5.4279479  |
| H  | 2.1385452  | -5.3765202 | 3.9320896  |
| H  | 3.0607086  | -3.1662766 | 4.5889506  |
| H  | 1.6637391  | -1.6735529 | 3.1382275  |
| H  | -1.5361159 | -4.6000545 | 3.2374816  |
| H  | -0.1286117 | -6.0843259 | 4.6598022  |
| H  | 1.9755913  | -5.1572102 | 5.6786044  |
| C  | 4.5253579  | 1.2336931  | 0.5674142  |
| C  | -2.1944526 | -3.0970135 | -4.7329549 |
| C  | 0.8904403  | 5.4049765  | -4.1128028 |
| C  | 3.0065993  | 1.3637572  | 0.5149211  |

|   |            |            |            |
|---|------------|------------|------------|
| C | -1.1505377 | -2.4150730 | -3.8506235 |
| C | 0.2362035  | 4.7681370  | -2.8862693 |
| C | 2.4582863  | 2.1967645  | 1.6771739  |
| C | -0.8767141 | -3.2479142 | -2.5927278 |
| C | 0.5409921  | 3.2679776  | -2.8213038 |
| C | 2.9282042  | 1.6296080  | 3.0217904  |
| C | -0.4731972 | -4.6872766 | -2.9292995 |
| C | 2.0496954  | 2.9998458  | -2.8641770 |
| C | 4.4487273  | 1.4857451  | 3.0655614  |
| C | -1.5281419 | -5.3481727 | -3.8161504 |
| C | 2.6863560  | 3.6408434  | -4.0959863 |
| C | 4.9785879  | 0.6549468  | 1.9024609  |
| C | -1.7924449 | -4.5283305 | -5.0745337 |
| C | 2.3900822  | 5.1353230  | -4.1594375 |
| H | 4.9850883  | 2.2284487  | 0.4169208  |
| H | -3.1664975 | -3.1041657 | -4.2032059 |
| H | 0.4138142  | 5.0005147  | -5.0256303 |
| H | 2.5561585  | 0.3552094  | 0.5789213  |
| H | -0.2175569 | -2.2781767 | -4.4260772 |
| H | 0.6194350  | 5.2629210  | -1.9732031 |
| H | 2.8162998  | 3.2386486  | 1.5793004  |
| H | -1.8294274 | -3.2919824 | -2.0304266 |
| H | 0.0971410  | 2.7813258  | -3.7110204 |
| H | 2.4595219  | 0.6364883  | 3.1762052  |
| H | 0.4946936  | -4.6869198 | -3.4621496 |
| H | 2.5288885  | 3.4231613  | -1.9604179 |
| H | 4.9071016  | 2.4919272  | 3.0359785  |
| H | -2.4683054 | -5.4604415 | -3.2429715 |
| H | 2.2942465  | 3.1456859  | -5.0043928 |
| H | 4.6099987  | -0.3860020 | 1.9942192  |
| H | -0.8805938 | -4.5141039 | -5.7015915 |
| H | 2.8826475  | 5.6435170  | -3.3081479 |
| H | 4.8700738  | 0.6022936  | -0.2705271 |
| H | -2.3443071 | -2.5067330 | -5.6529088 |
| H | 0.6904982  | 6.4897229  | -4.1130549 |
| H | 2.6952266  | 1.7867247  | -0.4549060 |
| H | -1.4932526 | -1.4026882 | -3.5629498 |
| H | -0.8522554 | 4.9468026  | -2.9126051 |
| H | 2.5955482  | 2.2712932  | 3.8548369  |
| H | -0.3268743 | -5.2803984 | -2.0082414 |
| H | 2.2451282  | 1.9109516  | -2.8510304 |
| H | 4.7458841  | 1.0399406  | 4.0297650  |
| H | -1.2003890 | -6.3679768 | -4.0793970 |
| H | 3.7747627  | 3.4604191  | -4.0859927 |
| H | 6.0793500  | 0.6007634  | 1.9437709  |
| H | -2.5775300 | -5.0079828 | -5.6826562 |
| H | 2.8267475  | 5.5711844  | -5.0734900 |
| C | -1.9516384 | 3.9622086  | 4.3709256  |
| C | 3.8710430  | -2.7715330 | -3.4456637 |
| C | -4.1276716 | 2.4025217  | -2.9823614 |
| C | -1.4908089 | 3.2654601  | 3.0920123  |
| C | 2.4037267  | -2.4440533 | -3.1730496 |
| C | -2.6157763 | 2.2056384  | -2.8877090 |
| C | 0.0392362  | 3.2088623  | 3.0234428  |
| C | 1.9809054  | -2.8848118 | -1.7664845 |
| C | -2.0603900 | 2.7305456  | -1.5582755 |



|   |            |            |            |
|---|------------|------------|------------|
| C | 0.6577555  | 4.6065291  | 3.1399722  |
| C | 2.9174485  | -2.2731799 | -0.7183441 |
| C | -2.8075162 | 2.1169117  | -0.3711342 |
| C | 0.1784613  | 5.3059412  | 4.4123259  |
| C | 4.3794170  | -2.6162609 | -0.9914613 |
| C | -4.3153183 | 2.3261033  | -0.4790894 |
| C | -1.3431682 | 5.3552372  | 4.4935778  |
| C | 4.7946413  | -2.1761379 | -2.3900642 |
| C | -4.8567623 | 1.7831255  | -1.7961038 |
| H | -1.6566874 | 3.3491411  | 5.2434097  |
| H | 3.9963079  | -3.8703225 | -3.4660101 |
| H | -4.3484789 | 3.4854625  | -3.0236465 |
| H | -1.8810406 | 3.8308133  | 2.2243710  |
| H | 2.2448677  | -1.3500946 | -3.2695626 |
| H | -2.3797211 | 1.1243462  | -2.9747010 |
| H | 0.3843374  | 2.5979715  | 3.8795418  |
| H | 2.0292178  | -3.9879871 | -1.7018897 |
| H | -2.1827001 | 3.8292230  | -1.5259832 |
| H | 0.3670438  | 5.2126303  | 2.2605984  |
| H | 2.7954106  | -1.1741143 | -0.7478912 |
| H | -2.5928121 | 1.0315882  | -0.3411027 |
| H | 0.5785496  | 4.7665523  | 5.2915579  |
| H | 4.5254760  | -3.7075458 | -0.8859190 |
| H | -4.5399221 | 3.4065841  | -0.4037927 |
| H | -1.7345753 | 5.9989200  | 3.6824507  |
| H | 4.7603834  | -1.0703230 | -2.4510297 |
| H | -4.7306909 | 0.6824365  | -1.8188673 |
| H | -3.0534195 | 4.0171644  | 4.3851125  |
| H | 4.1452060  | -2.4108454 | -4.4514321 |
| H | -4.4941453 | 1.9764867  | -3.9315653 |
| H | -1.9146565 | 2.2460261  | 3.0295306  |
| H | 1.7731022  | -2.9220610 | -3.9393498 |
| H | -2.1252875 | 2.7051104  | -3.7403523 |
| H | 1.7598490  | 4.5512511  | 3.1390517  |
| H | 2.6433524  | -2.5898539 | 0.3031693  |
| H | -2.4390568 | 2.5306326  | 0.5815487  |
| H | 0.6027640  | 6.3232446  | 4.4528917  |
| H | 5.0176629  | -2.1414880 | -0.2258796 |
| H | -4.8169395 | 1.8444098  | 0.3782702  |
| H | -1.6578895 | 5.8259462  | 5.4398673  |
| H | 5.8397502  | -2.4661810 | -2.5894993 |
| H | -5.9403158 | 1.9737135  | -1.8726539 |

**Tab. S29** Cartesian coordinates in Å of the optimized ground state structure of  $[\text{Au}_2(\text{dcpm})_2]^{2+}$  ( $C_2$  symmetry) obtained at the PBE0/x2c-TZVPPall-2c level of theory.

148

|    |            |            |            |
|----|------------|------------|------------|
| C  | 0.2824370  | 3.2098538  | 0.0916168  |
| P  | -0.2718142 | 2.3053456  | -1.4128457 |
| Au | 0.0110298  | -0.0059923 | -1.3536967 |
| P  | 0.2291095  | -2.3238516 | -1.4147244 |
| C  | -0.0984776 | -3.1821605 | 0.1848998  |
| P  | -0.7262772 | -2.2125552 | 1.6159629  |
| Au | -0.1544127 | 0.0430885  | 1.5753793  |
| P  | 0.6079691  | 2.2446751  | 1.6255851  |
| H  | -0.4788517 | 3.9720780  | 0.3217776  |
| H  | 1.2066521  | 3.7535703  | -0.1608080 |
| H  | -0.7923708 | -4.0177683 | -0.0021103 |
| H  | 0.8518244  | -3.6314429 | 0.5111862  |
| C  | -4.7044718 | -2.0086545 | 0.4201920  |
| C  | -3.1842563 | -1.8746169 | 0.3925313  |
| C  | -2.5348605 | -2.4704547 | 1.6449995  |
| C  | -3.1399394 | -1.8672320 | 2.9193040  |
| C  | -4.6617373 | -1.9981642 | 2.9314504  |
| C  | -5.2927433 | -1.3922975 | 1.6837191  |
| H  | -4.9776993 | -3.0793449 | 0.3694040  |
| H  | -2.9127221 | -0.8050609 | 0.3292883  |
| H  | -2.7005966 | -3.5641129 | 1.6499094  |
| H  | -2.8611003 | -0.7953770 | 2.9753818  |
| H  | -4.9326472 | -3.0685073 | 2.9979094  |
| H  | -5.1169502 | -0.2985598 | 1.6750959  |
| H  | -5.1313591 | -1.5348488 | -0.4810201 |
| H  | -2.7853483 | -2.3526894 | -0.5181022 |
| H  | -2.7205514 | -2.3520947 | 3.8170711  |
| H  | -5.0621267 | -1.5212207 | 3.8418663  |
| H  | -6.3865011 | -1.5316408 | 1.7030824  |
| C  | 2.0573038  | -3.3742737 | 4.4820206  |
| C  | 1.4896991  | -2.7755977 | 3.1967736  |
| C  | -0.0183548 | -3.0353532 | 3.0887757  |
| C  | -0.3446862 | -4.5282645 | 3.1992343  |
| C  | 0.2402745  | -5.1178510 | 4.4829323  |
| C  | 1.7393945  | -4.8618417 | 4.5909197  |
| H  | 1.6279730  | -2.8390041 | 5.3498803  |
| H  | 2.0123177  | -3.2306672 | 2.3333931  |
| H  | -0.5038188 | -2.5049703 | 3.9298974  |
| H  | 0.0795671  | -5.0654048 | 2.3293582  |
| H  | -0.2751156 | -4.6694588 | 5.3530939  |
| H  | 2.2657363  | -5.4097255 | 3.7856682  |
| H  | 3.1472423  | -3.2060131 | 4.5182169  |
| H  | 1.6911504  | -1.6887876 | 3.1519370  |
| H  | -1.4356374 | -4.6939457 | 3.1766550  |
| H  | 0.0273555  | -6.1994472 | 4.5196102  |
| H  | 2.1260613  | -5.2645260 | 5.5419325  |
| C  | 4.5338504  | 1.2135233  | 0.7577542  |
| C  | -2.2788496 | -2.9524529 | -4.7014887 |
| C  | 1.0207096  | 5.1686207  | -4.1875924 |
| C  | 3.0142835  | 1.3082480  | 0.6692087  |

|   |            |            |            |
|---|------------|------------|------------|
| C | -1.2115959 | -2.2860871 | -3.8355242 |
| C | 0.3288956  | 4.6031218  | -2.9468413 |
| C | 2.4326280  | 2.2033677  | 1.7673076  |
| C | -0.9217333 | -3.1345577 | -2.5918023 |
| C | 0.5844912  | 3.0973417  | -2.8209292 |
| C | 2.8757849  | 1.7146382  | 3.1513613  |
| C | -0.5301529 | -4.5720863 | -2.9520921 |
| C | 2.0836835  | 2.7772403  | -2.8282212 |
| C | 4.3970938  | 1.5974805  | 3.2373178  |
| C | -1.6067917 | -5.2177284 | -3.8240074 |
| C | 2.7569344  | 3.3479897  | -4.0748359 |
| C | 4.9686010  | 0.7170241  | 2.1317134  |
| C | -1.8940493 | -4.3825049 | -5.0671859 |
| C | 2.5110158  | 4.8477328  | -4.2013667 |
| H | 4.9771410  | 2.2080628  | 0.5625060  |
| H | -3.2395852 | -2.9584583 | -4.1514344 |
| H | 0.5427696  | 4.7444214  | -5.0906917 |
| H | 2.5810818  | 0.2977611  | 0.7914299  |
| H | -0.2890727 | -2.1530319 | -4.4277027 |
| H | 0.7163067  | 5.1208507  | -2.0483890 |
| H | 2.7881009  | 3.2404217  | 1.6198566  |
| H | -1.8643599 | -3.1798863 | -2.0129410 |
| H | 0.1358876  | 2.5893900  | -3.6959937 |
| H | 2.4167313  | 0.7243631  | 3.3463376  |
| H | 0.4263081  | -4.5682652 | -3.5052606 |
| H | 2.5638849  | 3.2200672  | -1.9345753 |
| H | 4.8402764  | 2.6084292  | 3.1664689  |
| H | -2.5348503 | -5.3324938 | -3.2319584 |
| H | 2.3608949  | 2.8299070  | -4.9686047 |
| H | 4.6182124  | -0.3248452 | 2.2711511  |
| H | -0.9964375 | -4.3672023 | -5.7143971 |
| H | 3.0088135  | 5.3730465  | -3.3636569 |
| H | 4.9090259  | 0.5448087  | -0.0368950 |
| H | -2.4440473 | -2.3513884 | -5.6117518 |
| H | 0.8575157  | 6.2585005  | -4.2330548 |
| H | 2.7104735  | 1.6590804  | -0.3315001 |
| H | -1.5366407 | -1.2739100 | -3.5307536 |
| H | -0.7528408 | 4.8154570  | -2.9958066 |
| H | 2.5153458  | 2.3938206  | 3.9419705  |
| H | -0.3671470 | -5.1780213 | -2.0422228 |
| H | 2.2394222  | 1.6837993  | -2.7685894 |
| H | 4.6778039  | 1.2068148  | 4.2299386  |
| H | -1.2891202 | -6.2358247 | -4.1054466 |
| H | 3.8386168  | 3.1331086  | -4.0417613 |
| H | 6.0689676  | 0.6875690  | 2.1998124  |
| H | -2.6954887 | -4.8511604 | -5.6623778 |
| H | 2.9739643  | 5.2324686  | -5.1253460 |
| C | -2.0438759 | 4.0620182  | 4.2790052  |
| C | 3.8104886  | -2.6322310 | -3.5314840 |
| C | -4.1113074 | 2.4203816  | -3.0112253 |
| C | -1.5522040 | 3.3181859  | 3.0386101  |
| C | 2.3470022  | -2.3165952 | -3.2263221 |
| C | -2.6046132 | 2.1911040  | -2.9067782 |
| C | -0.0213002 | 3.2576911  | 3.0108228  |
| C | 1.9575331  | -2.7785528 | -1.8166189 |
| C | -2.0535422 | 2.6893140  | -1.5650203 |

|   |            |            |            |
|---|------------|------------|------------|
| C | 0.5963995  | 4.6582822  | 3.0907462  |
| C | 2.9097744  | -2.1709744 | -0.7796941 |
| C | -2.8249043 | 2.0773930  | -0.3917753 |
| C | 0.0867150  | 5.4046536  | 4.3240796  |
| C | 4.3667492  | -2.5062122 | -1.0861399 |
| C | -4.3271402 | 2.3161595  | -0.5109915 |
| C | -1.4363560 | 5.4581213  | 4.3655392  |
| C | 4.7517789  | -2.0453383 | -2.4867338 |
| C | -4.8643160 | 1.7998588  | -1.8404832 |
| H | -1.7720724 | 3.4812123  | 5.1805500  |
| H | 3.9418261  | -3.7299031 | -3.5692094 |
| H | -4.3100934 | 3.5080790  | -3.0398474 |
| H | -1.9192739 | 3.8522780  | 2.1414724  |
| H | 2.1781681  | -1.2234881 | -3.3034220 |
| H | -2.3880290 | 1.1077189  | -3.0042111 |
| H | 0.3006506  | 2.6790517  | 3.8977815  |
| H | 2.0147475  | -3.8822304 | -1.7666379 |
| H | -2.1478203 | 3.7906098  | -1.5227874 |
| H | 0.3285458  | 5.2323201  | 2.1829721  |
| H | 2.7793378  | -1.0730850 | -0.7983424 |
| H | -2.6299038 | 0.9890849  | -0.3777337 |
| H | 0.4638943  | 4.8975949  | 5.2321785  |
| H | 4.5186932  | -3.5983247 | -0.9982653 |
| H | -4.5345388 | 3.3991435  | -0.4225599 |
| H | -1.8063340 | 6.0718929  | 3.5217716  |
| H | 4.7100602  | -0.9391201 | -2.5319451 |
| H | -4.7581611 | 0.6974744  | -1.8757158 |
| H | -3.1455749 | 4.1181766  | 4.2634085  |
| H | 4.0623007  | -2.2564839 | -4.5375706 |
| H | -4.4771908 | 2.0146114  | -3.9694696 |
| H | -1.9759633 | 2.2975998  | 3.0030284  |
| H | 1.7040960  | -2.7898910 | -3.9852026 |
| H | -2.0966996 | 2.6928355  | -3.7477260 |
| H | 1.6980402  | 4.6026861  | 3.1191920  |
| H | 2.6566370  | -2.4989030 | 0.2437610  |
| H | -2.4558730 | 2.4710727  | 0.5692042  |
| H | 0.5117162  | 6.4223851  | 4.3377611  |
| H | 5.0187603  | -2.0398149 | -0.3272444 |
| H | -4.8445227 | 1.8303749  | 0.3348501  |
| H | -1.7736920 | 5.9636198  | 5.2857316  |
| H | 5.7941687  | -2.3269511 | -2.7109097 |
| H | -5.9432043 | 2.0117105  | -1.9261388 |

**Tab. S30** Cartesian coordinates in Å of the optimized ground state structure of  $[\text{CuAg}(\text{dcpm})_2]^{2+}$  ( $C_2$  symmetry) obtained at the PBE0/x2c-TZVPPall-2c level of theory.

148

|    |            |            |            |
|----|------------|------------|------------|
| C  | 0.2947626  | 3.2384817  | 0.0714068  |
| P  | -0.2918336 | 2.1872505  | -1.3210698 |
| Cu | 0.1207142  | 0.0032913  | -1.1390665 |
| P  | 0.3451723  | -2.2071825 | -1.3258657 |
| C  | -0.1095146 | -3.1853087 | 0.1719184  |
| P  | -0.8097914 | -2.2492547 | 1.5944459  |
| Ag | -0.2610537 | 0.0893086  | 1.6133982  |
| P  | 0.6094235  | 2.3350200  | 1.6440842  |
| H  | -0.4547137 | 4.0244672  | 0.2555101  |
| H  | 1.2230511  | 3.7461287  | -0.2347062 |
| H  | -0.7990677 | -3.9957194 | -0.1145371 |
| H  | 0.8070471  | -3.6699813 | 0.5401702  |
| C  | -4.7729336 | -2.3350159 | 0.2853179  |
| C  | -3.2562330 | -2.1567048 | 0.2606801  |
| C  | -2.6150277 | -2.5611178 | 1.5906379  |
| C  | -3.2682589 | -1.8197694 | 2.7647238  |
| C  | -4.7834223 | -2.0100311 | 2.7761516  |
| C  | -5.4103547 | -1.5907822 | 1.4522824  |
| H  | -5.0071578 | -3.4130388 | 0.3649624  |
| H  | -3.0131721 | -1.0978695 | 0.0464138  |
| H  | -2.7545359 | -3.6490080 | 1.7315411  |
| H  | -3.0368343 | -0.7376944 | 2.6768381  |
| H  | -5.0138944 | -3.0734050 | 2.9744681  |
| H  | -5.2769851 | -0.5004627 | 1.3111599  |
| H  | -5.1991406 | -1.9951603 | -0.6744733 |
| H  | -2.8341390 | -2.7520884 | -0.5655660 |
| H  | -2.8441943 | -2.1566812 | 3.7260268  |
| H  | -5.2187762 | -1.4380269 | 3.6128210  |
| H  | -6.4981203 | -1.7709797 | 1.4699155  |
| C  | 1.8895937  | -3.3293750 | 4.5777918  |
| C  | 1.3466519  | -2.7296073 | 3.2825452  |
| C  | -0.1349795 | -3.0755878 | 3.0879594  |
| C  | -0.3712350 | -4.5883148 | 3.1476986  |
| C  | 0.1845681  | -5.1765327 | 4.4449378  |
| C  | 1.6583997  | -4.8356580 | 4.6335691  |
| H  | 1.3878364  | -2.8458381 | 5.4372052  |
| H  | 1.9371012  | -3.1227014 | 2.4327784  |
| H  | -0.6955508 | -2.6013894 | 3.9159957  |
| H  | 0.1284960  | -5.0755507 | 2.2886853  |
| H  | -0.3984083 | -4.7834838 | 5.2990634  |
| H  | 2.2549946  | -5.3285180 | 3.8418683  |
| H  | 2.9642789  | -3.0969834 | 4.6713256  |
| H  | 1.4853536  | -1.6313585 | 3.2791043  |
| H  | -1.4466539 | -4.8211743 | 3.0646792  |
| H  | 0.0359090  | -6.2694663 | 4.4446778  |
| H  | 2.0230817  | -5.2406821 | 5.5922612  |
| C  | 4.4551507  | 1.0967076  | 0.6753814  |
| C  | -2.0160721 | -2.4234750 | -4.7738533 |
| C  | 0.6929919  | 4.9072774  | -4.3668130 |
| C  | 2.9480221  | 1.3200452  | 0.5992622  |

|   |            |            |            |
|---|------------|------------|------------|
| C | -0.9619163 | -1.8944247 | -3.8033750 |
| C | 0.1071123  | 4.4019383  | -3.0481502 |
| C | 2.4353510  | 2.2038950  | 1.7391289  |
| C | -0.7628920 | -2.8699875 | -2.6374950 |
| C | 0.4274428  | 2.9183028  | -2.8408870 |
| C | 2.8678085  | 1.6492373  | 3.1014674  |
| C | -0.4081236 | -4.2778563 | -3.1251502 |
| C | 1.9343543  | 2.6498344  | -2.9326224 |
| C | 4.3757644  | 1.4132605  | 3.1636491  |
| C | -1.4683716 | -4.7906603 | -4.0996100 |
| C | 2.5023416  | 3.1593107  | -4.2559543 |
| C | 4.8587657  | 0.5202879  | 2.0268633  |
| C | -1.6710283 | -3.8264603 | -5.2637837 |
| C | 2.1905837  | 4.6379722  | -4.4611034 |
| H | 4.9747709  | 2.0592310  | 0.5118754  |
| H | -2.9992441 | -2.4417947 | -4.2651154 |
| H | 0.1739839  | 4.4077264  | -5.2065902 |
| H | 2.4339757  | 0.3398149  | 0.6651553  |
| H | -0.0103844 | -1.7453260 | -4.3438531 |
| H | 0.5323380  | 4.9904381  | -2.2127139 |
| H | 2.8455596  | 3.2233516  | 1.6157972  |
| H | -1.7354520 | -2.9320841 | -2.1137566 |
| H | -0.0569614 | 2.3379970  | -3.6496266 |
| H | 2.3405106  | 0.6898831  | 3.2834934  |
| H | 0.5706795  | -4.2570233 | -3.6378413 |
| H | 2.4566265  | 3.1645814  | -2.1032864 |
| H | 4.8967158  | 2.3873967  | 3.1108639  |
| H | -2.4249481 | -4.9258481 | -3.5595532 |
| H | 2.0685698  | 2.5700628  | -5.0859553 |
| H | 4.4213893  | -0.4918501 | 2.1398846  |
| H | -0.7466997 | -3.7852529 | -5.8709643 |
| H | 2.7212451  | 5.2344586  | -3.6942664 |
| H | 4.7725875  | 0.4307214  | -0.1459951 |
| H | -2.1175601 | -1.7303470 | -5.6263362 |
| H | 0.4851966  | 5.9854856  | -4.4711853 |
| H | 2.6801802  | 1.7480692  | -0.3813958 |
| H | -1.2607482 | -0.9024961 | -3.4152687 |
| H | -0.9828965 | 4.5733100  | -3.0362217 |
| H | 2.5680657  | 2.3335437  | 3.9129664  |
| H | -0.3055781 | -4.9765016 | -2.2750137 |
| H | 2.1380665  | 1.5681640  | -2.8166145 |
| H | 4.6376387  | 0.9759197  | 4.1418504  |
| H | -1.1765470 | -5.7879449 | -4.4696439 |
| H | 3.5914171  | 2.9846108  | -4.2831669 |
| H | 5.9532523  | 0.3948976  | 2.0788428  |
| H | -2.4634983 | -4.2003090 | -5.9334690 |
| H | 2.5772824  | 4.9760963  | -5.4369414 |
| C | -1.8501361 | 4.4335981  | 4.2808275  |
| C | 3.9943289  | -2.4820712 | -3.3247937 |
| C | -4.2337194 | 2.0763239  | -2.6785098 |
| C | -1.4364542 | 3.5908017  | 3.0756007  |
| C | 2.5503571  | -2.0932478 | -3.0133604 |
| C | -2.7190343 | 1.8812004  | -2.6460596 |
| C | 0.0880922  | 3.4524727  | 2.9990593  |
| C | 2.0664367  | -2.7284438 | -1.7036615 |
| C | -2.0983280 | 2.4998953  | -1.3887195 |

|   |            |            |            |
|---|------------|------------|------------|
| C | 0.7754083  | 4.8223627  | 2.9810217  |
| C | 3.0176199  | -2.3717722 | -0.5565079 |
| C | -2.7828968 | 1.9727223  | -0.1241802 |
| C | 0.3427272  | 5.6655410  | 4.1808787  |
| C | 4.4593005  | -2.7634754 | -0.8727920 |
| C | -4.2946997 | 2.1762772  | -0.1697910 |
| C | -1.1735541 | 5.7999495  | 4.2615129  |
| C | 4.9351243  | -2.1365376 | -2.1777791 |
| C | -4.9016662 | 1.5439561  | -1.4164219 |
| H | -1.5763995 | 3.8965881  | 5.2085745  |
| H | 4.0386084  | -3.5693654 | -3.5233133 |
| H | -4.4564837 | 3.1544440  | -2.7849357 |
| H | -1.8121554 | 4.0822601  | 2.1576250  |
| H | 2.4749793  | -0.9894815 | -2.9263715 |
| H | -2.4891276 | 0.7969599  | -2.6645867 |
| H | 0.4134871  | 2.9076681  | 3.9061188  |
| H | 2.0444814  | -3.8277060 | -1.8237761 |
| H | -2.2287602 | 3.5976156  | -1.4289561 |
| H | 0.5095824  | 5.3553137  | 2.0479763  |
| H | 2.9692671  | -1.2812264 | -0.3847284 |
| H | -2.5653363 | 0.8900983  | -0.0297562 |
| H | 0.7218052  | 5.1944625  | 5.1073851  |
| H | 4.5301624  | -3.8649590 | -0.9440614 |
| H | -4.5156378 | 3.2600738  | -0.1589452 |
| H | -1.5391582 | 6.3784783  | 3.3913649  |
| H | 4.9844249  | -1.0360018 | -2.0616128 |
| H | -4.7760628 | 0.4441198  | -1.3684010 |
| H | -2.9478100 | 4.5433161  | 4.2952147  |
| H | 4.3150219  | -1.9847805 | -4.2558380 |
| H | -4.6476192 | 1.5856857  | -3.5756202 |
| H | -1.9093063 | 2.5922383  | 3.1236981  |
| H | 1.9025664  | -2.3884270 | -3.8538306 |
| H | -2.2719561 | 2.3147040  | -3.5564885 |
| H | 1.8731880  | 4.7111334  | 2.9831264  |
| H | 2.7063087  | -2.8512642 | 0.3872364  |
| H | -2.3688023 | 2.4547500  | 0.7760441  |
| H | 0.8184806  | 6.6588749  | 4.1206872  |
| H | 5.1122343  | -2.4635067 | -0.0347339 |
| H | -4.7516274 | 1.7581746  | 0.7439657  |
| H | -1.4570982 | 6.3774097  | 5.1571895  |
| H | 5.9604347  | -2.4693937 | -2.4102826 |
| H | -5.9878697 | 1.7315594  | -1.4509379 |

**Tab. S31** Cartesian coordinates in Å of the optimized ground state structure of  $[\text{CuAu}(\text{dcpm})_2]^{2+}$  ( $C_2$  symmetry) obtained at the PBE0/x2c-TZVPPall-2c level of theory.

148

|    |            |            |            |
|----|------------|------------|------------|
| C  | 0.3822661  | 3.2149880  | 0.1050736  |
| P  | -0.0867140 | 2.2299834  | -1.3798318 |
| Cu | 0.0738520  | 0.0335669  | -1.1195248 |
| P  | 0.2655813  | -2.1696181 | -1.2922651 |
| C  | 0.3137163  | -3.0144633 | 0.3356583  |
| P  | -0.6269815 | -2.2010760 | 1.6793126  |
| Au | -0.1653972 | 0.0843415  | 1.6487811  |
| P  | 0.6141607  | 2.2832734  | 1.6709367  |
| H  | -0.3917192 | 3.9805554  | 0.2716701  |
| H  | 1.3198313  | 3.7516806  | -0.1096880 |
| H  | 0.0028316  | -4.0667982 | 0.2294354  |
| H  | 1.3609126  | -3.0098799 | 0.6769817  |
| C  | -4.5004804 | -1.9166524 | 0.2004481  |
| C  | -3.0432691 | -1.5760301 | 0.4923057  |
| C  | -2.3991056 | -2.6050364 | 1.4303105  |
| C  | -3.1914340 | -2.6685516 | 2.7428997  |
| C  | -4.6609539 | -2.9920615 | 2.4711537  |
| C  | -5.3015571 | -2.0122000 | 1.4943213  |
| H  | -4.5515684 | -2.8776191 | -0.3466971 |
| H  | -2.9932129 | -0.5895015 | 0.9901209  |
| H  | -2.4263921 | -3.6048137 | 0.9566943  |
| H  | -3.1136506 | -1.6934563 | 3.2629352  |
| H  | -4.7298504 | -4.0177376 | 2.0621104  |
| H  | -5.3566388 | -1.0098991 | 1.9609288  |
| H  | -4.9323967 | -1.1527625 | -0.4695161 |
| H  | -2.4745748 | -1.4710971 | -0.4478569 |
| H  | -2.7727147 | -3.4283982 | 3.4221075  |
| H  | -5.2141118 | -3.0030123 | 3.4252733  |
| H  | -6.3410121 | -2.3129068 | 1.2816941  |
| C  | 1.8207585  | -3.1344453 | 4.9102178  |
| C  | 1.3732913  | -2.5265263 | 3.5818917  |
| C  | -0.0329027 | -3.0118165 | 3.2059437  |
| C  | -0.1001220 | -4.5428983 | 3.1659182  |
| C  | 0.3424930  | -5.1353019 | 4.5034865  |
| C  | 1.7383453  | -4.6574110 | 4.8892642  |
| H  | 1.1776353  | -2.7403062 | 5.7194758  |
| H  | 2.0943166  | -2.8145644 | 2.7921557  |
| H  | -0.7297285 | -2.6444718 | 3.9827902  |
| H  | 0.5718629  | -4.9176696 | 2.3712754  |
| H  | -0.3816424 | -4.8436558 | 5.2874190  |
| H  | 2.4749976  | -5.0553145 | 4.1651278  |
| H  | 2.8486285  | -2.8049631 | 5.1393867  |
| H  | 1.3913558  | -1.4223012 | 3.6388377  |
| H  | -1.1175805 | -4.8894174 | 2.9134728  |
| H  | 0.3121533  | -6.2363526 | 4.4458582  |
| H  | 2.0218224  | -5.0654444 | 5.8737418  |
| C  | 4.5361670  | 1.0652451  | 1.0579840  |
| C  | -2.9612230 | -2.9422253 | -3.8410261 |
| C  | 1.4775255  | 4.8891812  | -4.2269607 |
| C  | 3.0286953  | 1.2166263  | 0.8814354  |
| C  | -1.7619843 | -2.2071244 | -3.2466062 |
| C  | 0.6972552  | 4.4255740  | -2.9964532 |



|   |            |            |            |
|---|------------|------------|------------|
| C | 2.4271453  | 2.1836839  | 1.9082016  |
| C | -1.0750413 | -3.0653734 | -2.1791168 |
| C | 0.8844273  | 2.9223469  | -2.7695964 |
| C | 2.7818754  | 1.7503139  | 3.3354413  |
| C | -0.6698646 | -4.4406274 | -2.7203552 |
| C | 2.3680939  | 2.5523386  | -2.6673113 |
| C | 4.2907867  | 1.5797160  | 3.5052205  |
| C | -1.8828336 | -5.1589273 | -3.3112219 |
| C | 3.1335984  | 3.0174671  | -3.9044217 |
| C | 4.8778950  | 0.6212930  | 2.4755465  |
| C | -2.5675589 | -4.3137707 | -4.3804341 |
| C | 2.9528749  | 4.5139672  | -4.1373686 |
| H | 5.0306618  | 2.0304790  | 0.8399727  |
| H | -3.7343835 | -3.0617619 | -3.0571265 |
| H | 1.0329851  | 4.4284772  | -5.1293434 |
| H | 2.5483128  | 0.2270051  | 1.0150806  |
| H | -1.0448906 | -1.9589980 | -4.0500121 |
| H | 1.0567635  | 4.9806535  | -2.1087787 |
| H | 2.8298532  | 3.1984299  | 1.7301032  |
| H | -1.8183555 | -3.2403708 | -1.3788983 |
| H | 0.4729798  | 2.3823157  | -3.6440571 |
| H | 2.2751581  | 0.7894999  | 3.5568046  |
| H | 0.0969590  | -4.3227493 | -3.5067237 |
| H | 2.8119925  | 3.0355267  | -1.7757824 |
| H | 4.7782538  | 2.5677441  | 3.4070008  |
| H | -2.6023420 | -5.3856643 | -2.5011136 |
| H | 2.7689342  | 2.4572475  | -4.7862781 |
| H | 4.4747219  | -0.3962845 | 2.6472463  |
| H | -1.8832055 | -4.1865728 | -5.2407606 |
| H | 3.4249766  | 5.0730265  | -3.3066924 |
| H | 4.9234277  | 0.3429726  | 0.3178960  |
| H | -3.4163804 | -2.3289373 | -4.6373002 |
| H | 1.3617685  | 5.9795418  | -4.3465037 |
| H | 2.7951706  | 1.5410986  | -0.1463418 |
| H | -2.0832333 | -1.2442172 | -2.8070508 |
| H | -0.3711456 | 4.6748684  | -3.1152683 |
| H | 2.4104115  | 2.4832865  | 4.0708443  |
| H | -0.2145579 | -5.0586866 | -1.9252948 |
| H | 2.4829925  | 1.4606827  | -2.5307972 |
| H | 4.5059646  | 1.2303738  | 4.5291225  |
| H | -1.5680997 | -6.1303122 | -3.7283698 |
| H | 4.2027859  | 2.7671712  | -3.7946710 |
| H | 5.9709915  | 0.5489931  | 2.6024324  |
| H | -3.4562655 | -4.8389320 | -4.7685569 |
| H | 3.4800630  | 4.8225036  | -5.0555166 |
| C | -2.1574090 | 4.2072448  | 4.1091561  |
| C | 3.2407699  | -2.1517114 | -4.1909963 |
| C | -3.7847695 | 2.4122019  | -3.2866907 |
| C | -1.5999960 | 3.4128469  | 2.9292842  |
| C | 1.8805825  | -1.9820788 | -3.5179314 |
| C | -2.2883263 | 2.1923680  | -3.0721009 |
| C | -0.0707054 | 3.3322015  | 2.9997807  |
| C | 1.8796611  | -2.5357744 | -2.0852960 |
| C | -1.8447168 | 2.6562411  | -1.6794958 |
| C | 0.5643893  | 4.7253286  | 3.0774392  |
| C | 3.0171612  | -1.9056653 | -1.2705915 |
| C | -2.7040699 | 2.0079762  | -0.5885410 |
| C | -0.0103800 | 5.5166766  | 4.2525310  |
| C | 4.3719116  | -2.0814385 | -1.9524421 |

|   |            |            |            |
|---|------------|------------|------------|
| C | -4.1955160 | 2.2351020  | -0.8151105 |
| C | -1.5316872 | 5.5956248  | 4.1905904  |
| C | 4.3586385  | -1.5219702 | -3.3697359 |
| C | -4.6200056 | 1.7512835  | -2.1967146 |
| H | -1.9555052 | 3.6531508  | 5.0451923  |
| H | 3.4454027  | -3.2301113 | -4.3267298 |
| H | -3.9914949 | 3.4987083  | -3.2987117 |
| H | -1.9038495 | 3.9148139  | 1.9906996  |
| H | 1.6200062  | -0.9037880 | -3.4834695 |
| H | -2.0552113 | 1.1140205  | -3.1853927 |
| H | 0.1889453  | 2.7732435  | 3.9190023  |
| H | 2.0124839  | -3.6325881 | -2.1163253 |
| H | -1.9410808 | 3.7562862  | -1.6179128 |
| H | 0.3642722  | 5.2753202  | 2.1380338  |
| H | 2.8087105  | -0.8230624 | -1.1536445 |
| H | -2.5018985 | 0.9199659  | -0.5947946 |
| H | 0.2970891  | 5.0316104  | 5.1981430  |
| H | 4.6285337  | -3.1567959 | -1.9812450 |
| H | -4.4235198 | 3.3126486  | -0.7129258 |
| H | -1.8338358 | 6.1869864  | 3.3048850  |
| H | 4.2144539  | -0.4238528 | -3.3312739 |
| H | -4.4965154 | 0.6513161  | -2.2543410 |
| H | -3.2545436 | 4.2802178  | 4.0194807  |
| H | 3.2050192  | -1.7139113 | -5.2029793 |
| H | -4.0715747 | 2.0325102  | -4.2818708 |
| H | -2.0350601 | 2.3965150  | 2.9059322  |
| H | 1.1032671  | -2.4720448 | -4.1260257 |
| H | -1.7231629 | 2.7220690  | -3.8569772 |
| H | 1.6611513  | 4.6529437  | 3.1766348  |
| H | 3.0613208  | -2.3279384 | -0.2510539 |
| H | -2.4113024 | 2.3712281  | 0.4114159  |
| H | 0.4310458  | 6.5274023  | 4.2641182  |
| H | 5.1541316  | -1.5921341 | -1.3463290 |
| H | -4.7708596 | 1.7196699  | -0.0260220 |
| H | -1.9201026 | 6.1364153  | 5.0696348  |
| H | 5.3335099  | -1.6905919 | -3.8568175 |
| H | -5.6915623 | 1.9532470  | -2.3617238 |

**Tab. S32** Cartesian coordinates in Å of the optimized ground state structure of  $[\text{Cu}_2(\text{dcpm})_2]^{2+}$  ( $C_2$  symmetry) obtained at the PBE0/x2c-TZVPall-2c level of theory.

148

|    |            |            |            |
|----|------------|------------|------------|
| C  | 0.2968895  | 3.1623748  | 0.1028965  |
| P  | -0.2012464 | 2.1966558  | -1.3804321 |
| Cu | 0.0808428  | -0.0041606 | -1.2294508 |
| P  | 0.2307080  | -2.2145914 | -1.4220958 |
| C  | -0.0986017 | -3.1299841 | 0.1445535  |
| P  | -0.6914549 | -2.1042237 | 1.5524439  |
| Cu | -0.2199899 | 0.0655052  | 1.4139073  |
| P  | 0.5165705  | 2.1574332  | 1.6282801  |
| H  | -0.4621532 | 3.9384765  | 0.2881222  |
| H  | 1.2428618  | 3.6829162  | -0.1132079 |
| H  | -0.8085341 | -3.9502647 | -0.0474736 |
| H  | 0.8448662  | -3.5967422 | 0.4650649  |
| C  | -4.7527904 | -2.2085310 | 0.5992570  |
| C  | -3.2418825 | -2.0567700 | 0.4372955  |
| C  | -2.4887080 | -2.4176060 | 1.7205840  |
| C  | -3.0313408 | -1.6299534 | 2.9213193  |
| C  | -4.5422799 | -1.7957195 | 3.0675649  |
| C  | -5.2754755 | -1.4119176 | 1.7884691  |
| H  | -4.9954216 | -3.2785972 | 0.7388633  |
| H  | -3.0060732 | -1.0112503 | 0.1609819  |
| H  | -2.6164215 | -3.4988575 | 1.9125770  |
| H  | -2.7939284 | -0.5542929 | 2.7817018  |
| H  | -4.7681550 | -2.8483451 | 3.3210604  |
| H  | -5.1388621 | -0.3295602 | 1.5963236  |
| H  | -5.2549401 | -1.8948543 | -0.3324508 |
| H  | -2.9000510 | -2.6900038 | -0.3981636 |
| H  | -2.5318300 | -1.9455398 | 3.8531440  |
| H  | -4.8972346 | -1.1899600 | 3.9183764  |
| H  | -6.3601151 | -1.5718078 | 1.9066921  |
| C  | 2.2757660  | -3.0211872 | 4.3244636  |
| C  | 1.6174582  | -2.5350364 | 3.0356287  |
| C  | 0.1116673  | -2.8228558 | 3.0387523  |
| C  | -0.1715095 | -4.3097947 | 3.2729571  |
| C  | 0.5035793  | -4.7958259 | 4.5562862  |
| C  | 1.9999578  | -4.5027275 | 4.5590047  |
| H  | 1.8859891  | -2.4310045 | 5.1754366  |
| H  | 2.0951590  | -3.0513274 | 2.1812227  |
| H  | -0.3322372 | -2.2461410 | 3.8725005  |
| H  | 0.2097586  | -4.8978414 | 2.4160846  |
| H  | 0.0283624  | -4.2991316 | 5.4231363  |
| H  | 2.4934204  | -5.0968014 | 3.7658743  |
| H  | 3.3619648  | -2.8294800 | 4.2807265  |
| H  | 1.8000969  | -1.4540221 | 2.8908855  |
| H  | -1.2569052 | -4.4987101 | 3.3313219  |
| H  | 0.3205238  | -5.8764507 | 4.6799426  |
| H  | 2.4491134  | -4.8274115 | 5.5123949  |
| C  | 4.4352968  | 0.9702916  | 0.9650837  |
| C  | -2.3706632 | -2.5813205 | -4.6770755 |
| C  | 1.1571192  | 4.9831909  | -4.2081454 |
| C  | 2.9276639  | 1.1374271  | 0.8056628  |
| C  | -1.2487054 | -2.0116041 | -3.8112910 |
| C  | 0.4323434  | 4.4521031  | -2.9712137 |

|   |            |            |            |
|---|------------|------------|------------|
| C | 2.3352160  | 2.0777396  | 1.8603569  |
| C | -0.9758474 | -2.9259891 | -2.6115356 |
| C | 0.6780494  | 2.9498557  | -2.7985723 |
| C | 2.7044791  | 1.6133870  | 3.2737869  |
| C | -0.6679420 | -4.3637246 | -3.0424646 |
| C | 2.1757921  | 2.6223709  | -2.7625381 |
| C | 4.2134747  | 1.4258607  | 3.4254524  |
| C | -1.7956204 | -4.9149594 | -3.9149180 |
| C | 2.8844551  | 3.1610949  | -4.0038733 |
| C | 4.7852928  | 0.4884235  | 2.3680602  |
| C | -2.0689767 | -4.0117896 | -5.1130828 |
| C | 2.6463301  | 4.6579265  | -4.1737946 |
| H | 4.9333108  | 1.9382061  | 0.7684915  |
| H | -3.3167385 | -2.5626519 | -4.1022996 |
| H | 0.7018018  | 4.5369198  | -5.1123606 |
| H | 2.4418177  | 0.1472414  | 0.9180705  |
| H | -0.3362799 | -1.9008142 | -4.4230243 |
| H | 0.7993006  | 4.9911881  | -2.0768975 |
| H | 2.7327933  | 3.0977407  | 1.7033319  |
| H | -1.9084301 | -2.9475997 | -2.0165047 |
| H | 0.2469351  | 2.4206022  | -3.6700457 |
| H | 2.1912628  | 0.6545786  | 3.4881736  |
| H | 0.2756296  | -4.3854626 | -3.6170477 |
| H | 2.6364424  | 3.0795189  | -1.8655890 |
| H | 4.7079099  | 2.4120306  | 3.3457772  |
| H | -2.7146865 | -5.0101041 | -3.3055976 |
| H | 2.5104218  | 2.6226453  | -4.8951562 |
| H | 4.3778620  | -0.5311216 | 2.5181048  |
| H | -1.1873839 | -4.0127606 | -5.7820707 |
| H | 3.1231654  | 5.2026025  | -3.3362675 |
| H | 4.8134426  | 0.2661835  | 0.2032994  |
| H | -2.5258907 | -1.9336064 | -5.5567166 |
| H | 0.9995452  | 6.0720305  | -4.2865815 |
| H | 2.6885351  | 1.4889839  | -0.2133167 |
| H | -1.5142343 | -0.9978829 | -3.4574197 |
| H | -0.6475887 | 4.6653377  | -3.0502798 |
| H | 2.3484812  | 2.3361858  | 4.0263098  |
| H | -0.5170601 | -5.0157327 | -2.1630610 |
| H | 2.3263941  | 1.5292295  | -2.6766697 |
| H | 4.4352379  | 1.0509462  | 4.4388665  |
| H | -1.5373949 | -5.9339158 | -4.2491479 |
| H | 3.9643173  | 2.9446144  | -3.9371374 |
| H | 5.8789478  | 0.4065216  | 2.4839811  |
| H | -2.9073140 | -4.4123081 | -5.7072261 |
| H | 3.1356048  | 5.0180979  | -5.0941064 |
| C | -2.2117904 | 3.9678052  | 4.2154099  |
| C | 3.7214952  | -2.5676824 | -3.6857262 |
| C | -4.0097830 | 2.2456401  | -3.0732947 |
| C | -1.6823051 | 3.2315115  | 2.9858796  |
| C | 2.2823140  | -2.2159743 | -3.3117153 |
| C | -2.4990055 | 2.0627051  | -2.9411775 |
| C | -0.1517464 | 3.1567371  | 3.0097374  |
| C | 1.9286054  | -2.7179235 | -1.9060889 |
| C | -1.9865676 | 2.5572496  | -1.5841296 |
| C | 0.4740429  | 4.5506640  | 3.1300607  |
| C | 2.9406396  | -2.1813888 | -0.8872594 |
| C | -2.7662872 | 1.9122971  | -0.4339138 |
| C | -0.0709394 | 5.2874778  | 4.3537622  |
| C | 4.3721742  | -2.5563000 | -1.2610374 |

|   |            |            |            |
|---|------------|------------|------------|
| C | -4.2723649 | 2.1057564  | -0.5801363 |
| C | -1.5938797 | 5.3564526  | 4.3401787  |
| C | 4.7218445  | -2.0552957 | -2.6570580 |
| C | -4.7662454 | 1.5874084  | -1.9254354 |
| H | -1.9787521 | 3.3747911  | 5.1199121  |
| H | 3.8114330  | -3.6668834 | -3.7701470 |
| H | -4.2418053 | 3.3269170  | -3.0923927 |
| H | -2.0138210 | 3.7753534  | 2.0806499  |
| H | 2.1501574  | -1.1147605 | -3.3447090 |
| H | -2.2499030 | 0.9878542  | -3.0503719 |
| H | 0.1335453  | 2.5651319  | 3.9007588  |
| H | 1.9531217  | -3.8237847 | -1.8997962 |
| H | -2.1085317 | 3.6553221  | -1.5315266 |
| H | 0.2423148  | 5.1375897  | 2.2207106  |
| H | 2.8539437  | -1.0782491 | -0.8626779 |
| H | -2.5403440 | 0.8270251  | -0.4262181 |
| H | 0.2677986  | 4.7658059  | 5.2687798  |
| H | 4.4854728  | -3.6557735 | -1.2200093 |
| H | -4.5124836 | 3.1813519  | -0.4858110 |
| H | -1.9263455 | 5.9834733  | 3.4905761  |
| H | 4.7195509  | -0.9473207 | -2.6592065 |
| H | -4.6252001 | 0.4890117  | -1.9702423 |
| H | -3.3116004 | 4.0357584  | 4.1605320  |
| H | 3.9484576  | -2.1617246 | -4.6860192 |
| H | -4.3440891 | 1.8412626  | -4.0436026 |
| H | -2.1158650 | 2.2155440  | 2.9282025  |
| H | 1.5966500  | -2.6386935 | -4.0624652 |
| H | -1.9900968 | 2.5905905  | -3.7650838 |
| H | 1.5737057  | 4.4846860  | 3.1932801  |
| H | 2.7138813  | -2.5365118 | 0.1329316  |
| H | -2.4279253 | 2.3069814  | 0.5380706  |
| H | 0.3632090  | 6.3005930  | 4.3953877  |
| H | 5.0698528  | -2.1442562 | -0.5115029 |
| H | -4.7924382 | 1.5973365  | 0.2505051  |
| H | -1.9602490 | 5.8548627  | 5.2531118  |
| H | 5.7441988  | -2.3643386 | -2.9316048 |
| H | -5.8493737 | 1.7661061  | -2.0306806 |
